1 **Comprehensive longitudinal microbiome analysis of the chicken cecum reveals a shift from**  
2 **competitive to environmental drivers and a window of opportunity for *Campylobacter***

3  
4 Umer Zeeshan Ijaz<sup>&1</sup>, Lojika Sivaloganathan<sup>&2</sup>, Aaron Mckenna<sup>&3</sup>, Anne Richmond<sup>3</sup>, Carmel Kelly<sup>4</sup>, Mark  
5 Linton<sup>4</sup>, Alexandros Stratakos<sup>4</sup>, Ursula Lavery<sup>3</sup>, Abdi Elmi<sup>2</sup>, Brendan Wren<sup>2</sup>, Nick Dorrell<sup>\*2</sup>, Nicolae  
6 Corcionivoschi<sup>\*4</sup> and Ozan Gundogdu<sup>\*2</sup>

7  
8 <sup>1</sup>School of Engineering, University of Glasgow, Glasgow, G12 8LT, UK  
9 <sup>2</sup>Faculty of Infectious & Tropical Diseases, London School of Hygiene and Tropical Medicine, Keppel  
10 Street, London, WC1E 7HT, UK  
11 <sup>3</sup>Moy Park, 39 Seagoe Industrial Estate, Portadown, Craigavon, Co. Armagh, BT63 5QE, UK  
12 <sup>4</sup>Agri-Food and Biosciences Institute, Food Microbiology, Newforge Lane, Belfast, BT9 5PX, UK

13  
14 <sup>&</sup>These authors are joint first authors.  
15 <sup>\*</sup>These authors jointly directed this work.

16 For correspondence, contact:  
17 Ozan Gundogdu ([ozan.gundogdu@lshtm.ac.uk](mailto:ozan.gundogdu@lshtm.ac.uk))  
18 Nicolae Corcionivoschi ([Nicolae.Corcionivoschi@afbini.gov.uk](mailto:Nicolae.Corcionivoschi@afbini.gov.uk))  
19 Nick Dorrell ([nick.dorrell@lshtm.ac.uk](mailto:nick.dorrell@lshtm.ac.uk))

20  
21 **Abstract**  
22 Chickens are a key food source for humans yet their microbiome contains bacteria that can be pathogenic to  
23 humans, and indeed potentially to chickens themselves. *Campylobacter* is present within the chicken gut and  
24 is the leading cause of bacterial foodborne gastroenteritis within humans worldwide. Infection can lead to  
25 secondary sequelae such as Guillain-Barré syndrome and stunted growth in children from low-resource  
26 areas. Despite the global health impact and economic burden of *Campylobacter*, how and when  
27 *Campylobacter* appears within chickens remains unclear. As such, there has been a motivation to decrease  
28 the number of *Campylobacter* within chickens and thus reduce the risk of infection to humans. The lack of

29 day-to-day microbiome data with replicates, relevant metadata, and a lack of natural infection studies have  
30 delayed our understanding of the chicken gut microbiome and *Campylobacter*. Here, we performed a  
31 comprehensive day-to-day microbiome analysis of the chicken cecum from day 3 to 35 (12 replicates each  
32 day; n=396) combining metadata such as chicken weight and feed conversion rates to investigate what the  
33 driving forces are for the microbial changes within the chicken gut over time, and how this relates to  
34 *Campylobacter* appearance within a natural habitat setting. We found a rapidly increasing microbial diversity  
35 up to day 12 with variation observed both in terms of genera and abundance, before a stabilisation of the  
36 microbial diversity after day 20. In particular, we identified a shift from competitive to environmental drivers  
37 of microbial community from days 12 to 20 creating a window of opportunity whereby *Campylobacter*  
38 appears. *Campylobacter* was identified at day 16 which was one day after the most substantial changes in  
39 metabolic profiles observed. In addition, microbial variation over time is most likely influenced by the diet  
40 of the chickens whereby significant shifts in OTU abundances and beta dispersion of samples often  
41 corresponded with changes in feed. This study is unique in comparison to the most recent studies as neither  
42 sampling was sporadic nor *Campylobacter* was artificially introduced, thus the experiments were performed  
43 in a natural setting. We believe that our findings can be useful for future intervention strategies and can help  
44 elucidate the mechanism through which *Campylobacter* within chickens can be reduced.

45

## 46 **Introduction**

47 Chickens (*Gallus gallus domesticus*) are an important food source for humans with over 50 billion reared  
48 annually for meat and eggs (Part et al., 2016). Feed conversion and the health of chickens is heavily  
49 dependent on the largely unexplored complex gut microbial community which plays a role in nutrient  
50 assimilation, vitamin and amino acid production and prevention of pathogen colonization (Sergeant et al.,  
51 2014, Apajalahti, 2005, McNab, 2007, Józefiak et al., 2004). In chickens, the organ with the highest number  
52 and variety of bacteria is the cecum ( $10^{10}$ - $10^{11}$  cells/g) which plays an essential role in the digestion of non-  
53 starch polysaccharides (NSPs) found in chicken feed (Jozefiak et al., 2004, Barnes et al., 1972, Bjerrum et  
54 al., 2006). The importance of this organ is demonstrated when up to 10% of energy needs can be recovered  
55 from a well-functioning cecum (Jozefiak et al., 2004, Hegde et al., 1982), and also that the cecum remains a  
56 source of bacterial human infection and a reservoir of antibiotic resistance determinants.

57 The chicken cecum contracts several times a day releasing contents towards the ileum and the cloaca  
58 (Pauwels et al., 2015). Notably the cecal drop contains *Campylobacter*, a Gram-negative spiral shaped  
59 bacterium which causes an estimated 400 million human infections each year (Friedman et al., 2000, Walker,  
60 2005). *Campylobacter* causes bloody diarrhoea, fever and abdominal pains in humans and can also cause  
61 post infectious sequelae such as Guillain-Barré syndrome which is a potentially fatal paralytic autoimmune  
62 illness. In low-resource areas, asymptomatic and occasionally persistent *Campylobacter* infections are  
63 common in children younger than one year and correlate with stunted growth and therefore life-long physical  
64 and cognitive deficits (Amour et al., 2016). Approximately 80-90% of these infections are attributed to  
65 *Campylobacter jejuni*, with poultry as the most important source of human campylobacteriosis within  
66 industrialized countries (Humphrey et al., 2007, Mullner et al., 2009, Sheppard et al., 2009).  
67 *C. jejuni* colonizes the chicken cecum with relatively high numbers ( $10^9$  CFU per gram) and whereas  
68 traditionally was considered a commensal of the chicken gut, more recently has been demonstrated to be  
69 pathogenic to the chicken, with this dependent on the genetics of the host and the strain of infection (Van  
70 Deun et al., 2008, Hermans et al., 2012, Wigley, 2015, Humphrey et al., 2014, Humphrey et al., 2015).  
71 Natural colonisation of chickens is reported to be typically at approximately day 14 of the chicken life cycle,  
72 although we do not know how and why this occurs, and what the impact of *Campylobacter* is on the  
73 microbiome (Kalupahana et al., 2013, Neill et al., 1984, Thibodeau et al., 2015).  
74 The microbiome of chickens develop rapidly from days 1-3 where *Enterobacteriaceae* dominate, with  
75 *Firmicutes* increasing in abundance and taxonomic diversity from approximately day 7 onwards (Ballou et  
76 al., 2016, Mancabelli et al., 2016, Danzeisen et al., 2011). Bacterial populations within the chicken gut are  
77 subsequently driven by the rearing environment and from the bacteria present in food and water (Connerton  
78 et al., 2018). How and when *Campylobacter* appears and the impact on the chicken gut microbiome remains  
79 unanswered. The presence of *Campylobacter* has been noted to prompt an increase in *Bifidobacterium* and  
80 modify abundances of *Clostridia* and *Mollicutes* (Thibodeau et al., 2015). The identification of a number of  
81 hydrogenases within the ceca may lead to a potential hydrogen sink and provide an explanation as to the  
82 high abundance of genera such as *Campylobacter* (Sergeant et al., 2014). Comparison of broilers not exposed  
83 and exposed to *C. jejuni* at day 6 or day 20 revealed reductions in the relative abundance of operational  
84 taxonomic units (OTUs) within the taxonomic family *Lactobacillaceae* and the *Clostridium* cluster XIVa,

85 with specific members of the *Lachnospiraceae* and *Ruminococcaceae* families exhibiting transient shifts in  
86 microbial community populations dependent upon the age at which the birds become colonized by *C. jejuni*  
87 (Connerton et al., 2018). These studies have enhanced our understanding of the chicken cecal microbiome,  
88 however the lack of day-to-day microbiome data, suitable replicate numbers, relevant metadata, and lack of  
89 natural infectivity studies have not allowed us to fully appreciate what is occurring in a natural habitat in  
90 relation to how and when *Campylobacter* appears within the chicken gut. To answer these questions, in this  
91 study we have performed a comprehensive analysis of the chicken cecal microbiome from days 3 to 35, with  
92 12 replicates per day (n=396), correlating additional metadata such as chicken weight and feed conversion  
93 rates with *Campylobacter* detection in a natural environmental setting.

94

## 95 **Experimental procedures**

96

### 97 **Experimental design, broilers and sample collection**

98 This study was performed using a total of 396 Ross-308 male broiler chickens provided by Moy Park (39  
99 Seagoe Industrial Estate, Portadown, Craigavon, Co. Armagh, BT63 5QE, UK). The birds were divided into  
100 12 pens; each pen contained 33 chickens (Supplementary Figure 1). Birds were raised on three phase diets  
101 from day 0 to day 35. Starter diets were offered to the birds from days 0-10, grower diets from days 11-25  
102 and finisher diets from days 26-35. Every 24 hours, a single chicken from each of the 12 pens was removed  
103 at random, euthanized by cervical dislocation or anaesthesia combined with cervical dislocation, followed  
104 by genomic DNA (gDNA) extracted from the chicken cecum. A total of 16 samples were removed from the  
105 final analysis due to poor gDNA quality.

106

### 107 **Poultry growth and performance measurements**

108 The performance parameters investigated were mean body weight (BW\_mean), body weight gain (Gain),  
109 feed intake (FI) and feed conversion ratio (FCR). Measurements were taken at time points 3-7 days, 8-14  
110 days, 15-24 days and 25-35 days. These variables were then correlated with the microbial community's  
111 composition in various statistical analyses.

112

### 113 **DNA extraction, 16S rRNA amplification and sequencing**

114 Cecal gDNA was extracted using the QIAamp DNA Stool Mini Kit according to the manufacturer's  
115 instructions and stored at -20°C. 16S metagenomic sequencing library construction was performed using  
116 Illumina guidelines (Illumina, U.S.A). The 16S ribosomal primers used were V3  
117 (tcgtcggcagcgtcagatgtgtataagagacagcctacggngggcwgag) and V4  
118 (gtctcgtgggctcggagatgtgtataagagacaggactachvgggtatctaatcc) (Klindworth et al., 2013, D'Amore et al., 2016).  
119 A second PCR step was performed to attach dual indices and Illumina sequencing adapters using the Nextera  
120 XT Index kit. Sequencing was performed on the Illumina MiSeq at LSHTM using a v3 300 bp paired-end  
121 kit.

122

### 123 **Bioinformatics**

124 Abundance tables were obtained by constructing OTUs (a proxy for species) as follows. Paired-end reads  
125 were trimmed and filtered using Sickle v1.200 (Joshi and Fass, 2011) by applying a sliding window approach  
126 and trimming regions where the average base quality drops below 20. Following this we applied a 10 bp  
127 length threshold to discard reads that fall below this length. We then used BayesHammer (Nikolenko et al.,  
128 2013) from the Spades v2.5.0 assembler to error correct the paired-end reads followed by pandaseq  
129 (v2.4) with a minimum overlap of 20 bp to assemble the forward and reverse reads into a single sequence  
130 spanning the entire V3-V4 region. The above choice of software was as a result of author's recent work  
131 (Schirmer et al., 2015, D'Amore et al., 2016) where it was shown that the above strategy reduces the  
132 substitution rates (main form of error) significantly. After having obtained the consensus sequences from  
133 each sample, we used the VSEARCH (v2.3.4) pipeline (all these steps are documented in  
134 <https://github.com/torognes/vsearch/wiki/VSEARCH-pipeline>) for OTU construction. The approach is as  
135 follows: we pool the reads from different samples together and add barcodes to keep an account of the  
136 samples these reads originate from. We then dereplicate the reads and sort them by decreasing abundance  
137 and discard singletons. In the next step, the reads are clustered based on 97% similarity, followed by  
138 removing clusters that have chimeric models built from more abundant reads (--uchime\_denovo option in  
139 vsearch). A few chimeras may be missed, especially if they have parents that are absent from the reads or  
140 are present with very low abundance. Therefore, in the next step, we use a reference-based chimera filtering

141 step (--uchime\_ref option in vsearch) using a gold  
142 database (<https://www.mothur.org/w/images/f/fl/Silva.gold.bacteria.zip>). The original barcoded reads were  
143 matched against clean OTUs with 97% similarity (a proxy for species level separation) to generate OTU  
144 table (a total of 18,588 unique sequences) for n=382 samples.

145 The representative OTUs were then taxonomically classified against the SILVA SSU Ref NR database  
146 release v123 database with assign\_taxonomy.py script from the Qiime (Caporaso et al., 2010) workflow. To  
147 find the phylogenetic distances between OTUs, we first multisequence aligned the OTUs against each other  
148 using Kalign v2.0.4 (Lassmann and Sonnhammer, 2005) (using the options -gpo 11 -gpe 0.85) and then used  
149 FastTree v2.1.7 (Price et al., 2010) to generate the phylogenetic tree in NEWICK format. Finally  
150 make\_otu\_table.py from Qiime workflow was employed to combine abundance table with taxonomy  
151 information to generate biome file for OTUs. Tax4Fun (Asshauer et al., 2015) was used to predict the  
152 functional capabilities of microbial communities based on 16S rRNA datasets (all prokaryotic KEGG  
153 organisms are available in Tax4Fun for SILVA v123 and KEGG database release 64.0) and then utilising  
154 ultrafast protein classification (UProC) tool (Meinicke, 2015) to generate metabolic functional profiles after  
155 normalising the data for 16S rRNA gene copy numbers. In Tax4Fun, we used MoP-Pro approach (Asshauer  
156 and Meinicke, 2013) to give pre-computed 274 KEGG Pathway reference profiles. Although Tax4Fun based  
157 metabolic prediction is constrained by the taxa available in the reference database, it gives a statistic called  
158 fraction-of-taxonomic-units-unexplained (FTU) which reflects the amount of sequences assigned to a  
159 taxonomic unit and not transferable to KEGG reference organisms. This can be used as a measure of  
160 confidence in trusting the predictions. Summary statistics of FTUs returned in this study are as follows: 1<sup>st</sup>  
161 Quantile:0.09129; Median:0.13995; Mean:0.14902; and 3<sup>rd</sup> Quantile:0.19800 (Figure 1h). Thus, on average  
162 metabolic profiles of ~86% of the taxa were present and therefore with this high representation, we used the  
163 pathways in the statistical analysis.

164

## 165 **Statistical analysis**

166 Statistical analyses were performed in R using the tables and data generated as above as well as the meta  
167 data associated with the study. For community analysis (including alpha and beta diversity analyses) we  
168 used the vegan package (Oksanen et al., 2015). For alpha diversity measures, we calculated: *Richness*,

169 estimated number of species/features per sample; and *Shannon* entropy: a commonly used index to  
170 characterise species diversity. To calculate Unifrac distances (that account for phylogenetic closeness), we  
171 used the phyloseq (McMurdie and Holmes, 2013) package. Nonmetric Distance Scaling (NMDS) plot of  
172 community data (OTUs) used different distance measures (Vegan's `metamds()` function): *Bray-*  
173 *Curtis*, considers the species abundance count; *Unweighted Unifrac*, considers the phylogenetic distance  
174 between the branch lengths of OTUs observed in different samples without taking into account the  
175 abundances; and *Weighted Unifrac*, unweighted unifrac distance weighted by the abundances of OTUs. The  
176 samples are grouped for different treatments as well as the mean ordination value and spread of points  
177 (ellipses were drawn using Vegan's `ordiellipse()` function that represent the 95% confidence interval of the  
178 standard errors of the groups).

179 To understand multivariate homogeneity of groups dispersion (variances) between multiple conditions, we  
180 used Vegan's `betadisper()` function in which the distances between objects and group centroids are handled  
181 by reducing the original distances (BrayCurtis, Unweighted Unifrac, or Weighted Unifrac) to principal  
182 coordinates and then performing ANOVA on them. We used Vegan's `adonis()` for analysis of variance using  
183 distance matrices (BrayCurtis/Unweighted Unifrac/Weighted Unifrac) i.e., partitioning distance matrices  
184 among sources of variation (Grouping type i.e., weeks, body weight, feed intake, feed conversion ratio etc.).  
185 This function, henceforth referred to as PERMANOVA, fits linear models to distance matrices and uses a  
186 permutation test with pseudo-F ratios.

187 To find OTUs that are significantly different between multiple conditions (days/weeks), we used  
188 `DESeqDataSetFromMatrix()` function from DESeq2 (Love et al., 2014) package with the adjusted p-value  
189 significance cut-off of 0.05 and log2 fold change cut-off of 2. This function uses negative binomial GLM to  
190 obtain maximum likelihood estimates for OTUs log fold change between two conditions. Then Bayesian  
191 shrinkage is applied to obtain shrunken log fold changes subsequently employing the Wald test for obtaining  
192 significances. To find KEGG pathways significantly up/down-regulated between multiple conditions  
193 (days/weeks), the Kruskal-Wallis test was used with p-values adjusted for multiple comparisons using the  
194 `fdrtool` package (Klaus and Strimmer, 2013, Klaus and Strimmer, 2015).

195 We performed Local Contribution to Beta Diversity (LCBD) analysis (Legendre and De Caceres, 2013) by  
196 using `LCBD.comp()` from `adespatial` package (Dray et al., 2018). We used the Hellinger distance



197 (abundances), unweighted (phylogenetic distance) and weighted Unifrac (phylogenetic distance weighted  
198 by abundance) dissimilarities. LCBD gives the sample-wise local contributions to beta diversity that could  
199 be derived as a proportion of the total beta diversity. In the context of this longitudinal study, it provides a  
200 mean to show how markedly different the microbial community structure of a single sample is from the  
201 average (with higher LCBD values representing outliers), and also provides a mean to show when the  
202 community structure has stabilised in a temporal setting.

203 To characterise the phylogenetic community composition within each sample whether the microbial  
204 community structure is stochastic (driven by competition among taxa) or deterministic (driven by strong  
205 environmental pressure i.e. host environment), we quantified: mean-nearest-taxon-distance (MNTD) and the  
206 nearest-taxon-index (NTI) using `mntd()`, and `ses.mntd()`; and mean-phylogenetic-diversity (MPD) and  
207 nearest-relative-index (NRI) using `mpd()` and `ses.mpd()` function from the `picante` (Kembel et al., 2010)  
208 package. NTI and NRI represent the negative of the output from `ses.mntd()` and `ses.mpd()`, respectively.  
209 They also quantify the number of standard deviations that the observed MNTD/MPD is from the mean of  
210 the null distribution (999 randomization by using `null.model='richness'` in the `ses.mntd()` and `ses.mpd()`  
211 functions and only considering the taxa as present/absent without taking their abundances). We used the top  
212 1000 most abundant OTUs for calculation of these measures based on the recommendations given in (Stegen  
213 et al., 2012).

214 We used the “BVSTEP” routine (Clarke and Ainsworth, 1993), an algorithm that searches for highest  
215 correlation (Mantel test) between dissimilarities of a fixed and variable multivariate datasets using `bvStep()`  
216 from `sinkr` package (Taylor, 2014) by permuting through  $2^n - 1$  possible combinations of features in the  
217 variable dataset. Testing all feature combinations is unrealistic and computationally intractable when the  
218 feature space is high (18,588 OTUs in our case). Thus, we used the abundance table with 1000 most abundant  
219 OTUs (with the premise that the most abundant species that may have a significant role to play) to best  
220 correlate with the overall similarities given all the OTUs (18,588 in our case). This analysis is complimentary  
221 to the differential analysis and identified the OTUs that were causing the major shifts in beta diversity.

222 The phylogenetic tree and annotations summarizing the findings of this study were drawn using Evolview  
223 (<http://www.evolgenius.info/evolview/>).



224 We considered analyses on two different groupings of the sample data, comparison of microbial profiles on  
225 a daily basis to reveal temporal patterns, and on a weekly basis (4 weeks), primarily because the poultry  
226 growth and performance parameters were recorded on a weekly basis. The statistical scripts and workflows  
227 for all above can be found at <http://userweb.eng.gla.ac.uk/umer.ijaz#bioinformatics>

228

## 229 **Results**

### 230 Daily diversity patterns converge to a stable community as we go forward in time

231 Although alpha diversity (Shannon) on microbial counts (Figure 1a) shows a rapid increase over the first ten  
232 days, it follows a plateauing effect where the microbiome normalises at approximately day 12. This is in line  
233 with previous reports whereby the gastrointestinal (GI) tract of poultry comes into contact with exogenous  
234 microorganisms immediately after hatch and as the host grows, this microbiome becomes highly diverse  
235 until it reaches a relatively stable yet dynamic state (Pan and Yu, 2014). The same temporal phenomenon  
236 can be observed when considering local contributions to beta diversity based on abundance count (Hellinger  
237 distance; Figure 1b). When considering phylogenetic distances only (Unweighted Unifrac; Figure 1c),  
238 although the decrease in beta diversity contributions is marginally slower than the abundance counts  
239 counterpart, there is a sudden increase around day 20. Using both abundances and phylogenetic distances  
240 this seems to disappear (Weighted Unifrac; Figure 1d). It should be noted that a higher LCBD value suggests  
241 the diversity patterns of a sample is markedly different from the rest of the samples in an average sense. In  
242 contrast, the level of microbial diversity between the different pens was relatively stable (results not  
243 significant and thus not shown) suggesting less or no variability amongst pens. *Campylobacter* was detected  
244 in three chickens from the 12 pens at day 16 (Figure 1a). This is in line with previous reports where natural  
245 colonisation of chickens has been reported at approximately day 14 of the chicken life cycle (Kalupahana et  
246 al., 2013, Neill et al., 1984, Thibodeau et al., 2015, Hermans et al., 2011). *Campylobacter* was also identified  
247 in one of the chickens at day 3 and previously it has also been reported that chickens between 0 and 3 days  
248 of age can become infected with *Campylobacter* (Cawthraw et al., 1996).

### 249 Window of opportunity for *Campylobacter* between day 12 and day 20

250 Next, we explored ecological drivers of microbial community to determine whether there is any  
251 environmental pressure (host environment) responsible for assemblage of microbial community or if it is

252 driven purely by competition. Using NTI and NRI (Figure 1e, f), one can observe a step function response  
253 around day 12. For a single community, NTI/NRI greater than +2 indicates strong phylogenetic clustering  
254 (driven by environmental filtering) and less than -2 indicates phylogenetic overdispersion (environment has  
255 little or no role to play). Since chicken ceca are already a constrained environment to begin with (as opposed  
256 to real environmental datasets), the lower bound of -2 may not be feasible and hence the values should be  
257 taken relatively with an increasing value implying increasing host environmental pressure. It should be noted  
258 that whilst NRI reflects the phylogenetic clustering in a broad sense (whole phylogenetic tree) with the  
259 negative values representing evenly spread community, NTI focuses more on the tips of the tree with positive  
260 values of NTI indicating that species co-occur with more closely related species than expected, and negative  
261 values indicate that closely related species do not co-occur. We have chosen presence/absence of species  
262 while calculating these measures without taking into account the abundances as they mask the phenomenon  
263 similar to LCBD profiles (Figure 1c, d). When we consider differential analysis of OTUs (Supplementary  
264 Table 1), we can notice that between days 9 and 11 there is a high proportion of OTUs that were log<sub>2</sub> fold  
265 different. After day 20, we also observe the same between days 26 and 28 with the changes in phylogenetic  
266 structure responsible for peaks in NTI/NRI. Interestingly, chickens were raised on three phase diets; starter  
267 diets (days 0-10), grower diets (days 11-25) and finisher diets (days 26-35). The high proportion of OTUs  
268 that were log<sub>2</sub> fold different between days 26 and 28 may be attributed to the change in feed from grower to  
269 finisher feed. Since the NTI/NRI are already significantly higher than 2, we do not consider this as an upper  
270 bound and revert back to day 20 as an upper bound for the window. Based on beta dispersion analysis (Table  
271 1), we observe days 11 to 13 and days 19 to 21 when the dispersions of the microbial communities are  
272 changing significantly. The alteration in the chicken feed from starter diet (days 0-10) to grower diets (days  
273 11-25) may also play a role in the significant beta dispersion between days 11 to 13, although the feed change  
274 does not seem a likely explanation for days 19 to 21. For completeness we also generated differential analysis  
275 of genus level where *Campylobacter* was identified as being significantly down-regulated between day 16  
276 to day 17 (Supplementary Table 2).

277 If we consider the richness of metabolic pathways (Figure 1g), we notice that they achieve stability before  
278 the microbial community at around day 6 with no obvious patterns to suggest anything apparent between  
279 day 12 and day 20 other than a marginal decrease to day 16 and increasing again onwards. However, if we

280 consider the differential expression analysis of pathways (Supplementary Table 3), we can notice a large  
281 proportion of these pathways changing between day 14 and 15, a day before *Campylobacter* was first  
282 observed. We identified a reduction in lysine degradation (ko00310) from day 14 to day 15, and an increase  
283 in D-Alanine metabolism (ko00473) from day 14 to day 15. *C. jejuni* typically cannot utilize sugars as a  
284 carbon source as it lacks the glycolytic enzyme phosphofructokinase and so depends on the availability of  
285 free amino and keto acids scavenged from the host or from the intestinal microbiome (Parkhill et al., 2000,  
286 Velayudhan and Kelly, 2002, Lee and Newell, 2006). *C. jejuni* utilizes serine, aspartate, glutamate and  
287 proline preferentially as nutritional substrates *in vitro* with serine catabolism required for colonization of the  
288 intestinal tract (Leach et al., 1997, Elharrif and Mégraud, 1986, Velayudhan et al., 2004, Hendrixson and  
289 DiRita, 2004). Amino acids can also potentially be deaminated to a small number of intermediates that can  
290 directly feed into the central metabolism, including pyruvate (from serine and alanine), oxaloacetate (from  
291 aspartate), and 2-oxoglutarate (from glutamate) (Velayudhan et al., 2004). The variation of such metabolic  
292 pathways may give an indication as to the appearance of *Campylobacter* at this time point. We also identified  
293 a reduction from days 14 to day 15 of a number of pathways relating to specific bacteria; *Vibrio cholerae*  
294 pathogenic cycle (ko05111; Biofilm formation - *Vibrio cholerae*), *Escherichia coli* (ko05130; Pathogenic  
295 *Escherichia coli* infection), *Salmonella* species (ko05132; *Salmonella* infection). In addition, we identified  
296 a reduction from day 14 to 15 of Bacterial secretion systems (ko03070). Future studies are needed to  
297 elucidate and confirm the predicted pathways. In view of these findings, *Campylobacter* appears in day 16  
298 within this window of opportunity (Figure 1) where there exists a shift from competitive to environmental  
299 drivers of microbial community, with day 16 lying immediately after the most substantial changes in  
300 metabolic profiles observed over the whole period.

### 301 Analysis of dominant bacterial group over time

302 Analysis of the 50 most abundant genera (Supplementary Figure 2) identified trends that have been reported  
303 previously in that the chicken microbiome contains *Enterobacteriaceae* at early days of development, and  
304 that *Firmicutes* increase in abundance and taxonomic diversity over time (Ballou et al., 2016, Mancabelli et  
305 al., 2016, Danzeisen et al., 2011). *Escherichia.Shigella* (Phylum *Proteobacteria*; Family  
306 *Enterobacteriaceae*) was identified as being highly abundant at day 3 and showed a general reduction up to  
307 approximately day 7. *Escherichia.Shigella* was also noted to be present after day 28. This pattern was

308 observed for *Eisenbergiella* (Phylum *Firmicutes*; Family *Lachnospiraceae*) which displayed a decrease from  
309 early time points, but remained present throughout. This pattern was also observed for *Ruminiclostridium*  
310 (Phylum *Firmicutes*; Family *Ruminococcaceae*) which however was not in the abundant genera after day  
311 23. *Flavonifractor* (Phylum *Firmicutes*; Family -) was identified consistently at early time points but was  
312 rarely abundant after day 19. *Enterobacter* (Phylum *Proteobacteria*; Family *Enterobacteriaceae*) was only  
313 observed at days 3 and 4 and was not abundant at any other time points. Here we identified that  
314 *Ruminiclostridium.5* and *Ruminiclostridium.9* (Phylum *Firmicutes*; Family *Ruminococcaceae*) were  
315 consistently present throughout at a relatively significant level of abundance. This was also the case for  
316 *Anaerotruncus* (Phylum *Firmicutes*; Family *Clostridiaceae*), but at a lower level of abundance, especially  
317 before day 7. *Faecalibacterium* (Phylum *Firmicutes*; Family *Clostridiaceae*) was rarely abundant at early  
318 time points, however was observed consistently at a relative high abundance after day 14. *Lachnoclostridium*  
319 (Phylum *Firmicutes*; Family *Lachnospiraceae*) was found to be present throughout with a relatively high  
320 level of fluctuation. Certain genera such as *Ruminococcaceae.UCG.005* and *Ruminococcaceae.UCG.014*  
321 (Phylum *Firmicutes*; Family *Ruminococcaceae*) were not abundant at high levels at early time points  
322 however increased significantly at approximately days 16-19. Finally, *Megamonas* (Phylum *Firmicutes*;  
323 Family *Veillonellaceae*) and *Intestinimonas* (Phylum *Firmicutes*; Family -) were not abundant throughout  
324 most time points, before appearing post day 22-25 onwards.

### 325 Weekly microbial profiles and analysis of poultry performance metadata

326 The metadata collected here included Bird Weight (BW\_Mean; grams), Body Weight Gain (Gain; g/bird),  
327 Feed Intake (FI), Feed Conversion Ratio (FCR), and was recorded on a weekly basis where we have  
328 considered grouping the microbiome samples accordingly; days 03-07 (week 1), days 08-14 (week 2), days  
329 15-24 (week 3), and days 25-35 (week 4). As is the case with the daily microbiome profile, alpha diversity  
330 (rarefied richness and Shannon; Figure 2a) increases over time, however, due to the nature of this grouping,  
331 we lose the plateauing effect over time. In accordance with daily analysis, we can see a major shift in the  
332 parameters as we transition from days 08-14 to days 15-24 (Figure 2b). FCR in particular increases  
333 substantially in this period remaining stable for week 4 (days 25-35). Gain is also significantly elevated in  
334 this transition period (days 08-14 to days 15-24) when compared to other periods. In terms of beta diversity  
335 (Figure 2c), we observe the samples more sparsely spread in the first week (days 03-07) as compared to

336 other weeks on abundance (Bray-Curtis) alone. The phylogenetic dispersion (Unweighted Unifrac) on the  
337 other hand is more preserved. We can also notice a gradient forming with later weeks more or less close to  
338 suggest convergence as we established in the case of daily profiles. Based on beta dispersion analysis (Table  
339 2), we can notice that the dispersion in week 1 is significantly different to other weeks with 16%, 6%, and  
340 17% variability in microbial community explained by PERMANOVA using counts alone (Bray-Curtis),  
341 phylogenetic distance alone (Unweighted Unifrac), and combination of two (Weighted Unifrac),  
342 respectively. With this grouping, main sources of variation are then the distribution of species rather than  
343 their phylogenetic relatedness. The metadata explains 10-12% variability (all significant) in terms of counts  
344 alone (Bray-Curtis) with 3-6% in terms of phylogeny (Unweighted Unifrac). For the sake of completeness,  
345 we also performed differential analysis of OTUs and pathways on a consecutive weekly basis (lower halves  
346 of Supplementary Tables 1, 2 and 3); however, these should be interpreted with great care as main source of  
347 variability are the daily changes and grouping samples on weekly basis will always return more significant  
348 OTUs and pathways.

#### 349 Key species representing majority of the shift in community dynamics

350 In addition to differential analysis on OTUs (Supplementary Table 1) which returned OTUs that were log<sub>2</sub>  
351 fold different between consecutive days, we also considered the subset analysis where we imploded the  
352 abundance table to the minimum set of OTUs, the resulting reduced-order abundance table correlated highly  
353 with the full table by preserving the beta diversity between the samples (Table 3). To see how much  
354 variability is lost, the PERMANOVA with full OTU table (18,588 OTUs) is provided as a reference. The 17  
355 OTUs listed represent only ~2% (subset S1) loss in variability and thus represent the main OTUs that are  
356 driving the community dynamics. In terms of metadata, the loss in variability is ~ 1% (subset S1). The subset  
357 of the phylogenetic tree of these OTUs in addition to those selected in the differential analysis (daily  
358 comparisons), a total of 110 OTUs, was then extracted and annotated with these analysis in Figure 3 along  
359 with taxonomy information. It can be seen that majority of these (>50%) belong to *Firmicutes* (*Bacillaceae*,  
360 *Ruminococcaceae*, *Lachnospiraceae*, *Lactobacillaceae*, *Peptostreptococcaceae*, and *Clostridiales vadin*  
361 *BB60 group*), with a small proportion belonging to *Actinobacteria* (*Coriobacteriaceae*), *Tenericutes*  
362 (*Mollicutes RF9*), and *Proteobacteria* (*Enterobacteriaceae* including *Escherichia*.*Shigella* as mentioned  
363 before).

364

365 **Discussion**

366 Comprehensive investigation of the chicken cecal microbiome at a day-to-day level revealed a rapid increase  
367 in diversity up to day 12, with microbial variation observed both in terms of genera and abundance. We  
368 suspect this early variation is due to competitive factors determined by space and available food resources.  
369 Post day 20 there exists a considerable stabilisation of the chicken cecal microbiome where the relative  
370 microbial diversity and abundances are standardised, with environmental factors (in this case the host  
371 chicken) exerting a greater influence on any change in the microbial diversity. Between days 12 and 20 we  
372 observe a shift from competitive to environmental drivers of microbial community creating a window of  
373 opportunity whereby *Campylobacter* appears. We identified *Campylobacter* at day 16 with this day lying  
374 immediately after the most substantial changes in metabolic profiles observed over the whole period. Whilst  
375 we identified *Campylobacter* within 25% of the pens on day 16, we would naturally expect *Campylobacter*  
376 to spread to other chickens and pens and also be identified on subsequent days. We suspect that the  
377 experimental set-up here was such that following random selection of birds from each pen on each day,  
378 sacrificing the bird (to perform gDNA extraction from the ceca) did not allow for an opportunity for  
379 *Campylobacter* to spread to other chickens or pens. Clearly in a typical farm set-up this would not be the  
380 case and *Campylobacter* would spread naturally.

381 Microbial variation over time is most likely influenced by diet of the chickens whereby significant shifts in  
382 OTU abundances and beta dispersion of the samples often corresponded with changes in feed. Notably, the  
383 relatively high proportion of OTUs that were log<sub>2</sub> fold different between days 9 and 11, and days 26 and 28,  
384 and beta dispersion for days 11-13 corresponded with changes in feed from grower to finisher. Further  
385 studies investigating different feed content is required to ascertain the complete impact on chicken cecal  
386 microbiome.

387 Previous microbiome studies of chicken ceca have often lacked the day-to-day sampling points, replicate  
388 numbers, relevant metadata and have often provided external *Campylobacter* infection that may potentially  
389 perturb the natural habitat. These have not allowed us to fully appreciate what is occurring in a natural  
390 environment in relation to how and when *Campylobacter* appears within the chicken gut. Thus, we believe  
391 the major strength of this study is that we achieve these missing points as we have performed the most



392 comprehensive analysis of the chicken cecal microbiome to date, sampling from days 3 to 35, with 12  
393 replicates per day (n=396), correlating additional metadata such as chicken weight and feed conversion rates  
394 and with *Campylobacter* detection in a natural environmental setting giving the most comparable  
395 experimental design to a farm set-up. As we were not able to sample the same chicken for all time points,  
396 future studies should investigate this further with added dietary information than what we have considered  
397 here, with experimental designs also to investigate and confirm the predicted pathways.

### 398 **Conclusions**

399 Industry has endeavoured to reduce the burden of *Campylobacter* within chicken production lines with  
400 supplements often administered with the aim of performance enhancing and/or reducing bacteria such as  
401 *Campylobacter*, typically post day 25. The relative stability of the chicken cecal microbiota at this time point  
402 may explain the efficacy of such products, however the identification of a window of opportunity for bacteria  
403 such as *Campylobacter* may call for intervention strategies between days 12 to 20, or even earlier. This study  
404 can act as a baseline for future intervention strategies and help reduce the burden of *Campylobacter* within  
405 chickens.

406

### 407 **Availability of supporting data**

408 The raw sequence files supporting the results of this article are available in the European Nucleotide Archive  
409 under the project accession number PRJEB25776.

### 410 **Author contributions**

411 AM, AR, UL, BW, ND, NC and OG contributed to the study design. ND, NC and OG managed the study.  
412 CK, AM. AS and ML performed the sample collection and DNA extraction. LS, AM, AE and OG performed  
413 the library preparation and Illumina MiSeq sequencing at the LSHTM. UZI wrote the analysis scripts to  
414 generate the figures and tables in this paper. UZI and OG performed the bioinformatics and statistical  
415 analysis. UZI, ND, NC and OG drafted the initial version of the manuscript with all authors contributed to  
416 redrafting.

### 417 **Acknowledgements**

418 The authors acknowledge research funding from Moy Park. UZI is funded by NERC Independent Research  
419 Fellowship (NE/L011956/1).



## 420 References

- 421 AMOUR, C., GRATZ, J., MDUMA, E., SVENSEN, E., ROGAWSKI, E. T., MCGRATH, M., SEIDMAN, J. C.,  
422 MCCORMICK, B. J., SHRESTHA, S., SAMIE, A., MAHFUZ, M., QURESHI, S., HOTWANI, A., BABJI, S.,  
423 TRIGOSO, D. R., LIMA, A. A., BODHIDATTA, L., BESSONG, P., AHMED, T., SHAKOOR, S., KANG, G.,  
424 KOSEK, M., GUERRANT, R. L., LANG, D., GOTTLIEB, M., HOUP, E. R., PLATTS-MILLS, J. A.,  
425 ETIOLOGY, R. F., INTERACTIONS OF ENTERIC, I., MALNUTRITION, THE CONSEQUENCES FOR CHILD,  
426 H. & DEVELOPMENT PROJECT NETWORK, I. 2016. Epidemiology and Impact of Campylobacter  
427 Infection in Children in 8 Low-Resource Settings: Results From the MAL-ED Study. *Clin Infect Dis*,  
428 63, 1171-1179.
- 429 APAJALAHTI, J. 2005. Comparative Gut Microflora, Metabolic Challenges, and Potential Opportunities.  
430 *The Journal of Applied Poultry Research*, 14, 444-453.
- 431 ASSHAUER, K. P. & MEINICKE, P. On the estimation of metabolic profiles in metagenomics. *In*:  
432 BEISSBARTH, T., KOLLMAR, M., LEHA, A., MORGENSTERN, B., SCHULTZ, A., WAACK, S. &  
433 WINGENDER, E., eds. German Conference on Bioinformatics 2013, 2013. Schloss Dagstuhl--  
434 Leibniz-Zentrum fuer Informatik, 1-13.
- 435 ASSHAUER, K. P., WEMHEUER, B., DANIEL, R. & MEINICKE, P. 2015. Tax4Fun: predicting functional profiles  
436 from metagenomic 16S rRNA data. *Bioinformatics*, 31, 2882-4.
- 437 BALLOU, A. L., ALI, R. A., MENDOZA, M. A., ELLIS, J. C., HASSAN, H. M., CROOM, W. J. & KOCI, M. D. 2016.  
438 Development of the Chick Microbiome: How Early Exposure Influences Future Microbial  
439 Diversity. *Front Vet Sci*, 3, 2.
- 440 BARNES, E. M., MEAD, G. C., BARNUM, D. A. & HARRY, E. G. 1972. The intestinal flora of the chicken in  
441 the period 2 to 6 weeks of age, with particular reference to the anaerobic bacteria. *Br Poult Sci*,  
442 13, 311-26.
- 443 BJERRUM, L., ENGBERG, R. M., LESER, T. D., JENSEN, B. B., FINSTER, K. & PEDERSEN, K. 2006. Microbial  
444 community composition of the ileum and cecum of broiler chickens as revealed by molecular and  
445 culture-based techniques. *Poult Sci*, 85, 1151-64.
- 446 CAPORASO, J. G., KUCZYNSKI, J., STOMBAUGH, J., BITTINGER, K., BUSHMAN, F. D., COSTELLO, E. K.,  
447 FIERER, N., PENA, A. G., GOODRICH, J. K., GORDON, J. I., HUTTLEY, G. A., KELLEY, S. T., KNIGHTS,  
448 D., KOENIG, J. E., LEY, R. E., LOZUPONE, C. A., MCDONALD, D., MUEGGE, B. D., PIRRUNG, M.,  
449 REEDER, J., SEVINSKY, J. R., TURNBAUGH, P. J., WALTERS, W. A., WIDMANN, J., YATSUNENKO, T.,  
450 ZANEVELD, J. & KNIGHT, R. 2010. QIIME allows analysis of high-throughput community  
451 sequencing data. *Nat Methods*, 7, 335-6.
- 452 CAWTHRAW, S. A., WASSENAAR, T. M., AYLING, R. & NEWELL, D. G. 1996. Increased colonization  
453 potential of Campylobacter jejuni strain 81116 after passage through chickens and its implication  
454 on the rate of transmission within flocks. *Epidemiol Infect*, 117, 213-5.
- 455 CLARKE, K. R. & AINSWORTH, M. 1993. A Method of Linking Multivariate Community Structure to  
456 Environmental Variables. *Marine Ecology Progress Series*, 92, 205-219.
- 457 CONNERTON, P. L., RICHARDS, P. J., LAFONTAINE, G. M., O'KANE, P. M., GHAFAR, N., CUMMINGS, N. J.,  
458 SMITH, D. L., FISH, N. M. & CONNERTON, I. F. 2018. The effect of the timing of exposure to  
459 Campylobacter jejuni on the gut microbiome and inflammatory responses of broiler chickens.  
460 *Microbiome*, 6, 88.
- 461 D'AMORE, R., IJAZ, U. Z., SCHIRMER, M., KENNY, J. G., GREGORY, R., DARBY, A. C., SHAKYA, M., PODAR,  
462 M., QUINCE, C. & HALL, N. 2016. A comprehensive benchmarking study of protocols and  
463 sequencing platforms for 16S rRNA community profiling. *BMC Genomics*, 17, 55.
- 464 DANZEISEN, J. L., KIM, H. B., ISAACSON, R. E., TU, Z. J. & JOHNSON, T. J. 2011. Modulations of the chicken  
465 cecal microbiome and metagenome in response to anticoccidial and growth promoter treatment.  
466 *PLoS One*, 6, e27949.
- 467 DRAY, S., BLANCHET, G., BORCARD, D., CLAPPE, S., GUENARD, G., JOMBART, T., LAROCQUE, G.,  
468 LEGENDRE, P., MADI, N. & WAGNER, H. H. 2018. adespatial: Multivariate Multiscale Spatial  
469 Analysis. 0.0–9 ed. <https://CRAN.R-project.org/package=adespatial>.
- 470 ELHARRIF, Z. & MÉGRAUD, F. 1986. Characterization of thermophilic Campylobacter: I. Carbon-substrate  
471 utilization tests. *Current Microbiology*, 13, 117-122.

- 472 FRIEDMAN, C. R., NEIMANN, J., WEGENER, H. C. & TAUXE, R. V. 2000. Epidemiology of *Campylobacter jejuni*  
473 infections in the United States and other industrialized nations. In: I. Nachamkin and M.J. Blaser,  
474 Editors, *Campylobacter* (edn 2). pp. 121–138.
- 475 HEGDE, S., ROLLS, B. & COATES, M. E. 1982. The effects of the gut microflora and dietary fibre on energy  
476 utilization by the chick. *British Journal of Nutrition*, 48, 73-80.
- 477 HENDRIXSON, D. R. & DIRITA, V. J. 2004. Identification of *Campylobacter jejuni* genes involved in  
478 commensal colonization of the chick gastrointestinal tract. *Mol Microbiol*, 52, 471-84.
- 479 HERMANS, D., PASMANS, F., HEYNDRIKX, M., VAN IMMERSEEL, F., MARTEL, A., VAN DEUN, K. &  
480 HAESEBROUCK, F. 2012. A tolerogenic mucosal immune response leads to persistent  
481 *Campylobacter jejuni* colonization in the chicken gut. *Crit Rev Microbiol*, 38, 17-29.
- 482 HERMANS, D., VAN DEUN, K., MARTEL, A., VAN IMMERSEEL, F., MESSENS, W., HEYNDRIKX, M.,  
483 HAESEBROUCK, F. & PASMANS, F. 2011. Colonization factors of *Campylobacter jejuni* in the  
484 chicken gut. *Vet Res*, 42, 82.
- 485 HUMPHREY, S., CHALONER, G., KEMMETT, K., DAVIDSON, N., WILLIAMS, N., KIPAR, A., HUMPHREY, T. &  
486 WIGLEY, P. 2014. *Campylobacter jejuni* is not merely a commensal in commercial broiler chickens  
487 and affects bird welfare. *MBio*, 5, e01364-14.
- 488 HUMPHREY, S., LACHARME-LORA, L., CHALONER, G., GIBBS, K., HUMPHREY, T., WILLIAMS, N. & WIGLEY,  
489 P. 2015. Heterogeneity in the Infection Biology of *Campylobacter jejuni* Isolates in Three Infection  
490 Models Reveals an Invasive and Virulent Phenotype in a ST21 Isolate from Poultry. *PLoS One*, 10,  
491 e0141182.
- 492 HUMPHREY, T., O'BRIEN, S. & MADSEN, M. 2007. *Campylobacters* as zoonotic pathogens: a food  
493 production perspective. *Int J Food Microbiol*, 117, 237-57.
- 494 JOSHI, N. & FASS, J. 2011. Sickle: A sliding-window, adaptive, quality-based trimming tool for FastQ files  
495 (Version 1.33). 1.33 ed.
- 496 JOZEFIAK, D., RUTKOWSKI, A. & MARTIN, S. 2004. Carbohydrate fermentation in the avian ceca: a review.  
497 *Animal Feed Science and Technology*, 113, 1-15.
- 498 JÓZEFIAK, D., RUTKOWSKI, A. & MARTIN, S. A. 2004. Carbohydrate fermentation in the avian ceca: a  
499 review. *Animal Feed Science and Technology*, 113, 1-15.
- 500 KALUPAHANA, R. S., KOTTAWATTA, K. S., KANANKEGE, K. S., VAN BERGEN, M. A., ABEYNAYAKE, P. &  
501 WAGENAAR, J. A. 2013. Colonization of *Campylobacter* spp. in broiler chickens and laying hens  
502 reared in tropical climates with low-biosecurity housing. *Appl Environ Microbiol*, 79, 393-5.
- 503 KEMBEL, S. W., COWAN, P. D., HELMUS, M. R., CORNWELL, W. K., MORLON, H., ACKERLY, D. D.,  
504 BLOMBERG, S. P. & WEBB, C. O. 2010. Picante: R tools for integrating phylogenies and ecology.  
505 *Bioinformatics*, 26, 1463-4.
- 506 KLAUS, B. & STRIMMER, K. 2013. Signal identification for rare and weak features: higher criticism or false  
507 discovery rates? *Biostatistics*, 14, 129-43.
- 508 KLAUS, B. & STRIMMER, K. 2015. fdrtool: Estimation of (Local) False Discovery Rates and Higher Criticism.  
509 3.0 ed. <https://CRAN.R-project.org/package=fdrtool>.
- 510 KLINDWORTH, A., PRUESSE, E., SCHWEER, T., PEPLIES, J., QUAST, C., HORN, M. & GLOCKNER, F. O. 2013.  
511 Evaluation of general 16S ribosomal RNA gene PCR primers for classical and next-generation  
512 sequencing-based diversity studies. *Nucleic Acids Res*, 41, e1.
- 513 LASSMANN, T. & SONNHAMMER, E. L. 2005. Kalign--an accurate and fast multiple sequence alignment  
514 algorithm. *BMC Bioinformatics*, 6, 298.
- 515 LEACH, S., HARVEY, P. & WALI, R. 1997. Changes with growth rate in the membrane lipid composition of  
516 and amino acid utilization by continuous cultures of *Campylobacter jejuni*. *J Appl Microbiol*, 82,  
517 631-40.
- 518 LEE, M. D. & NEWELL, D. G. 2006. *Campylobacter* in poultry: filling an ecological niche. *Avian Dis*, 50, 1-9.
- 519 LEGENDRE, P. & DE CACERES, M. 2013. Beta diversity as the variance of community data: dissimilarity  
520 coefficients and partitioning. *Ecol Lett*, 16, 951-63.
- 521 LOVE, M. I., HUBER, W. & ANDERS, S. 2014. Moderated estimation of fold change and dispersion for RNA-  
522 seq data with DESeq2. *Genome Biol*, 15, 550.

- 523 MANCABELLI, L., FERRARIO, C., MILANI, C., MANGIFESTA, M., TURRONI, F., DURANTI, S., LUGLI, G. A.,  
524 VIAPPIANI, A., OSSIPRANDI, M. C., VAN SINDEREN, D. & VENTURA, M. 2016. Insights into the  
525 biodiversity of the gut microbiota of broiler chickens. *Environ Microbiol*, 18, 4727-4738.
- 526 MCMURDIE, P. J. & HOLMES, S. 2013. phyloseq: an R package for reproducible interactive analysis and  
527 graphics of microbiome census data. *PLoS One*, 8, e61217.
- 528 MCNAB, J. M. 2007. The Avian Caeca: A Review. *World's Poultry Science Journal*, 29, 251-263.
- 529 MEINICKE, P. 2015. UProC: tools for ultra-fast protein domain classification. *Bioinformatics*, 31, 1382-8.
- 530 MULLNER, P., SPENCER, S. E., WILSON, D. J., JONES, G., NOBLE, A. D., MIDWINTER, A. C., COLLINS-  
531 EMERSON, J. M., CARTER, P., HATHAWAY, S. & FRENCH, N. P. 2009. Assigning the source of  
532 human campylobacteriosis in New Zealand: a comparative genetic and epidemiological approach.  
533 *Infect Genet Evol*, 9, 1311-9.
- 534 NEILL, S. D., CAMPBELL, J. N. & GREENE, J. A. 1984. Campylobacter species in broiler chickens. *Avian*  
535 *Pathology*, 13, 777-785.
- 536 NIKOLENKO, S. I., KOROBEYNIKOV, A. I. & ALEKSEYEV, M. A. 2013. BayesHammer: Bayesian clustering for  
537 error correction in single-cell sequencing. *BMC Genomics*, 14 Suppl 1, S7.
- 538 OKSANEN, J., BLANCHET, F., KINDT, R., LEGENDRE, P., MINCHIN, P., O'HARA, R., SIMPSON, G., SOLYMOS,  
539 P., STEVENS, M. & WAGNER, H. 2015. Vegan: Community Ecology Package, R Package version 2.2-  
540 1. version 2.2-1 ed.
- 541 PAN, D. & YU, Z. 2014. Intestinal microbiome of poultry and its interaction with host and diet. *Gut*  
542 *Microbes*, 5, 108-19.
- 543 PARKHILL, J., WREN, B. W., MUNGALL, K., KETLEY, J. M., CHURCHER, C., BASHAM, D., CHILLINGWORTH, T.,  
544 DAVIES, R. M., FELTWELL, T., HOLROYD, S., JAGELS, K., KARLYSHEV, A. V., MOULE, S., PALLEM, M.  
545 J., PENN, C. W., QUAIL, M. A., RAJANDREAM, M. A., RUTHERFORD, K. M., VAN VLIET, A. H.,  
546 WHITEHEAD, S. & BARRELL, B. G. 2000. The genome sequence of the food-borne pathogen  
547 *Campylobacter jejuni* reveals hypervariable sequences. *Nature*, 403, 665-8.
- 548 PART, C. E., EDWARDS, P., HAJAT, S. & COLLINS, L. M. 2016. Prevalence rates of health and welfare  
549 conditions in broiler chickens change with weather in a temperate climate. *R Soc Open Sci*, 3,  
550 160197.
- 551 PAUWELS, J., TAMINIAU, B., JANSSENS, G. P., DE BEENHOUWER, M., DELHALLE, L., DAUBE, G. &  
552 COOPMAN, F. 2015. Cecal drop reflects the chickens' cecal microbiome, fecal drop does not. *J*  
553 *Microbiol Methods*, 117, 164-70.
- 554 PRICE, M. N., DEHAL, P. S. & ARKIN, A. P. 2010. FastTree 2--approximately maximum-likelihood trees for  
555 large alignments. *PLoS One*, 5, e9490.
- 556 SCHIRMER, M., IJAZ, U. Z., D'AMORE, R., HALL, N., SLOAN, W. T. & QUINCE, C. 2015. Insight into biases  
557 and sequencing errors for amplicon sequencing with the Illumina MiSeq platform. *Nucleic Acids*  
558 *Res*, 43, e37.
- 559 SERGEANT, M. J., CONSTANTINIDOU, C., COGAN, T. A., BEDFORD, M. R., PENN, C. W. & PALLEM, M. J.  
560 2014. Extensive microbial and functional diversity within the chicken cecal microbiome. *PLoS*  
561 *One*, 9, e91941.
- 562 SHEPPARD, S. K., DALLAS, J. F., STRACHAN, N. J., MACRAE, M., MCCARTHY, N. D., WILSON, D. J.,  
563 GORMLEY, F. J., FALUSH, D., OGDEN, I. D., MAIDEN, M. C. & FORBES, K. J. 2009. Campylobacter  
564 genotyping to determine the source of human infection. *Clin Infect Dis*, 48, 1072-8.
- 565 STEGEN, J. C., LIN, X., KONOPKA, A. E. & FREDRICKSON, J. K. 2012. Stochastic and deterministic assembly  
566 processes in subsurface microbial communities. *ISME J*, 6, 1653-64.
- 567 TAYLOR, M. 2014. *sinkr: A collection of functions featured on the blog 'me nugget'* [Online]. Available:  
568 <https://github.com/menugget/sinkr>.
- 569 THIBODEAU, A., FRAVALO, P., YERGEAU, E., ARSENAULT, J., LAHAYE, L. & LETELLIER, A. 2015. Chicken  
570 Caecal Microbiome Modifications Induced by *Campylobacter jejuni* Colonization and by a Non-  
571 Antibiotic Feed Additive. *PLoS One*, 10, e0131978.

- 572 VAN DEUN, K., PASMANS, F., DUCATELLE, R., FLAHOUE, B., VISSENBERG, K., MARTEL, A., VAN DEN BROECK,  
573 W., VAN IMMERSEEL, F. & HAESBROUCK, F. 2008. Colonization strategy of *Campylobacter jejuni*  
574 results in persistent infection of the chicken gut. *Vet Microbiol*, 130, 285-97.
- 575 VELAYUDHAN, J., JONES, M. A., BARROW, P. A. & KELLY, D. J. 2004. L-serine catabolism via an oxygen-  
576 labile L-serine dehydratase is essential for colonization of the avian gut by *Campylobacter jejuni*.  
577 *Infect Immun*, 72, 260-8.
- 578 VELAYUDHAN, J. & KELLY, D. J. 2002. Analysis of gluconeogenic and anaplerotic enzymes in  
579 *Campylobacter jejuni*: an essential role for phosphoenolpyruvate carboxykinase. *Microbiology*,  
580 148, 685-94.
- 581 WALKER, R. I. 2005. Considerations for development of whole cell bacterial vaccines to prevent diarrheal  
582 diseases in children in developing countries. *Vaccine*, 23, 3369-85.
- 583 WIGLEY, P. 2015. Blurred Lines: Pathogens, Commensals, and the Healthy Gut. *Front Vet Sci*, 2, 40.
- 584

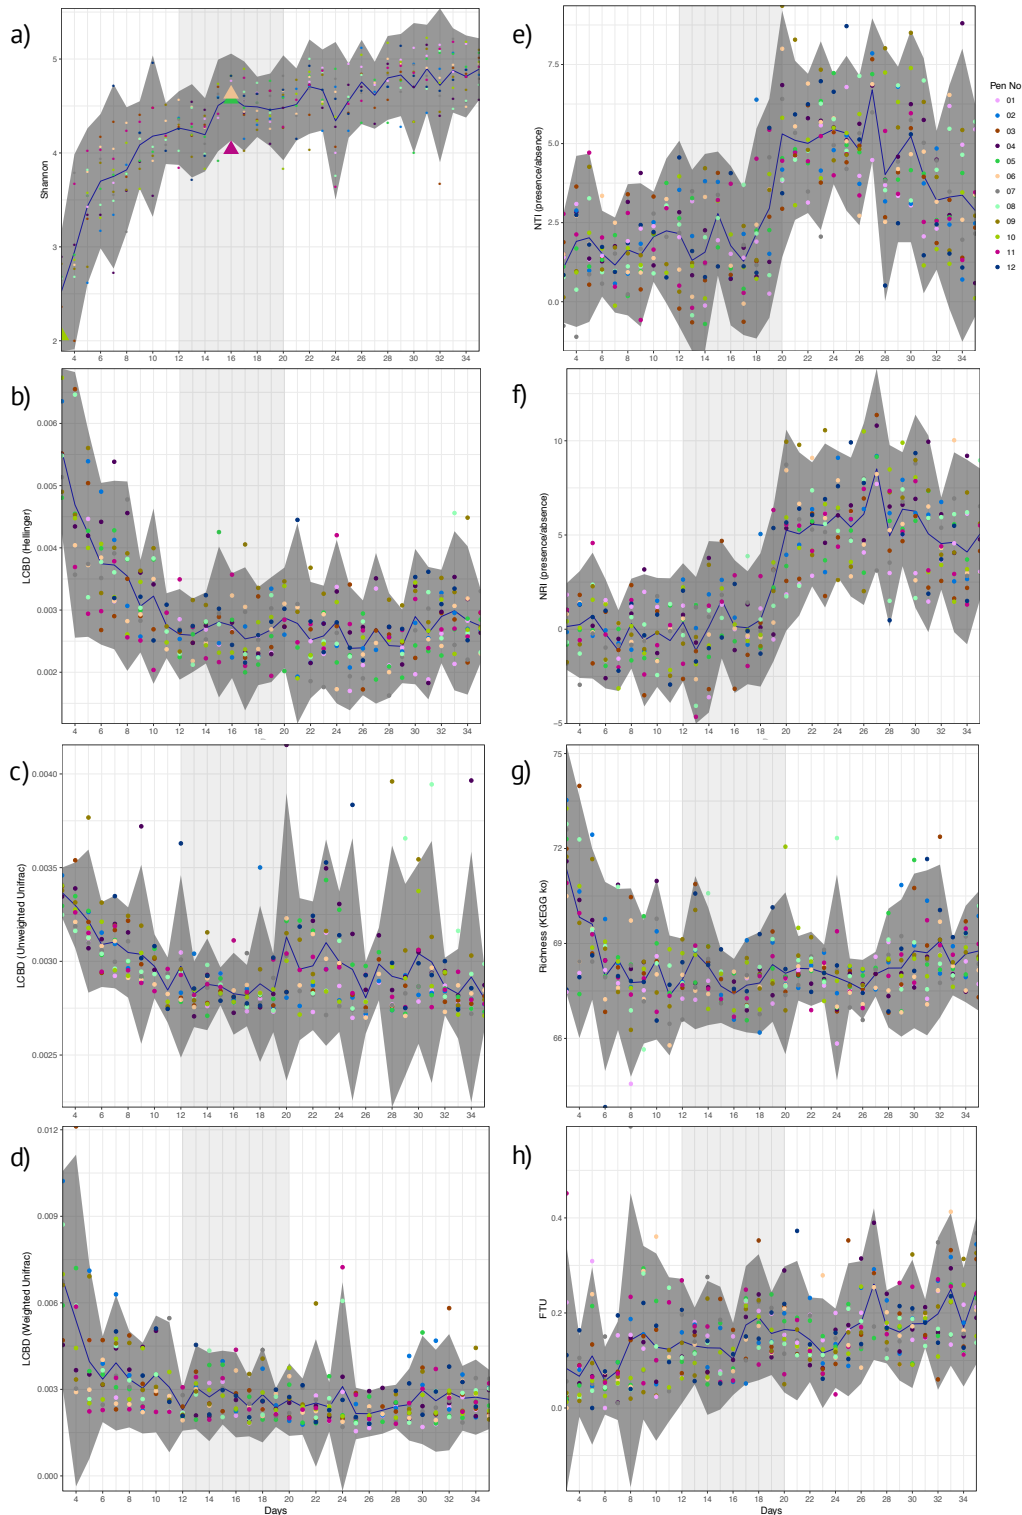

585

586

587

588

589

590

Figure 1: Day-wise statistical measures calculated on the microbiome data. a) Shannon entropy with first appearance of *Campylobacter* ( $\geq 5$  sequences) highlighted as triangles. b), c), and d) Local contribution to beta diversity (LCBD) calculated by using Hellinger transform on the microbial counts, Unweighted Unifrac dissimilarity (phylogenetic distances only), and Weighted Unifrac dissimilarity (phylogenetic distances weighted with abundance counts) respectively e) and f) Nearest-Taxon-Index (NTI) and nearest-relative-

591 index (NRI) considering presence/absence of OTUs in samples g) Richness calculated as exponentiation of  
592 Shannon entropy on the proportional representation of KEGG pathways on samples, and h) fraction-of-  
593 taxonomic-units-unexplained (FTU) calculated on each sample. In all subfigures, the mean value is  
594 represented by solid blue line with 95% confidence interval of standard deviation given as dark shaded  
595 region around the mean. The samples are coloured with respect to the pens they originate from. Based on  
596 the analysis given in this study, we have identified days 12 to 20 of importance and are thus highlighted as  
597 lighter shaded regions.  
598



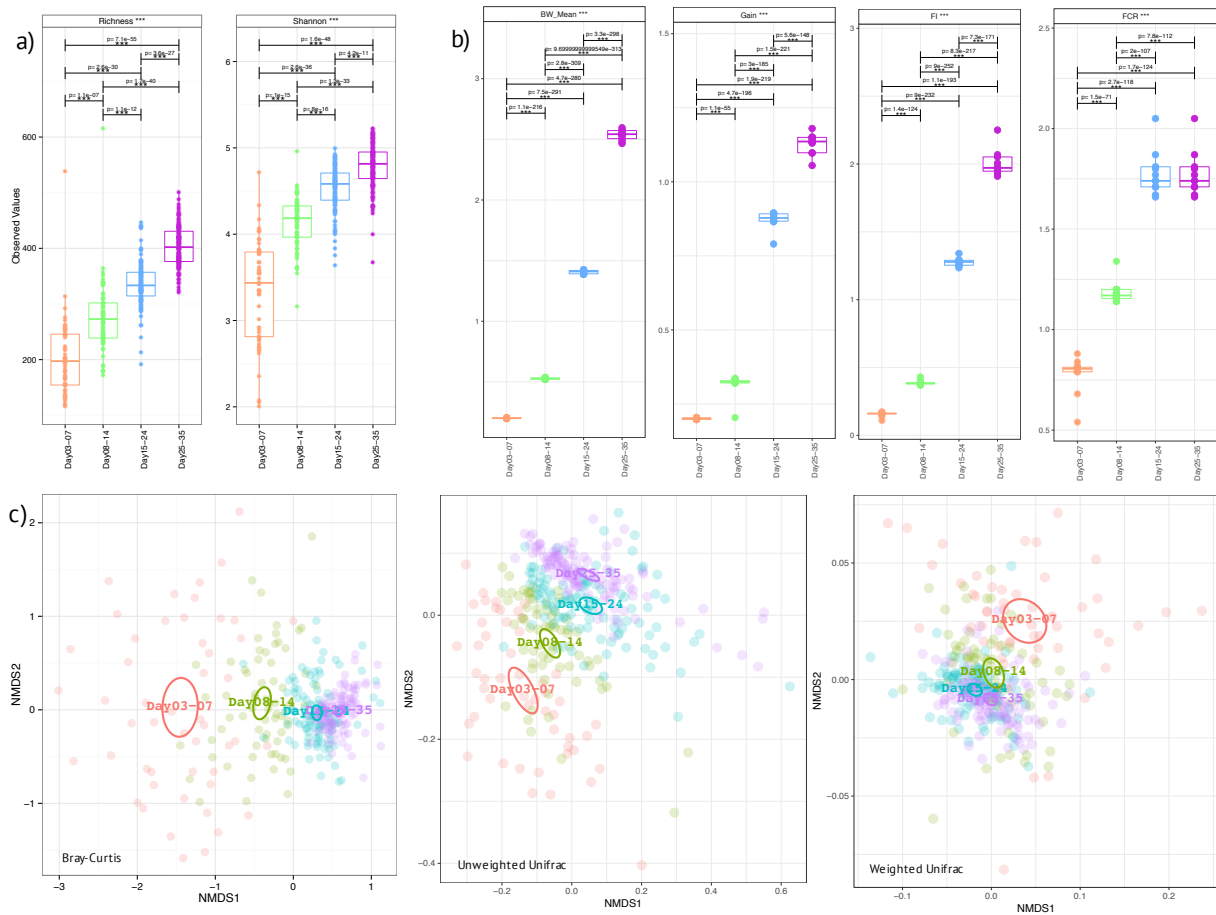

599  
 600 Figure 2: Week-wise measures calculated on the microbiome data a) Alpha diversity measures: Richness  
 601 (after rarefying the samples to minimum library size) and Shannon entropy b) Extrinsic parameters  
 602 calculated on weekly basis were mean body weight (BW\_mean), body weight gain (Gain), feed intake (FI),  
 603 feed conversion ratio (FCR), and c) Beta diversity measures using Bray-Curtis (counts), Unweighted Unifrac  
 604 (phylogenetic distance), and Weighted Unifrac (phylogenetic distance weighted by abundance counts). In a)  
 605 and b) we have performed pair-wise ANOVA and where significant the pairs were connected with p-values  
 606 drawn on top. In c) the ellipses represent the 95% confidence interval of the standard error of the ordination  
 607 points of a given grouping with labels drawn at the centre (mean) of the ordination points.

608



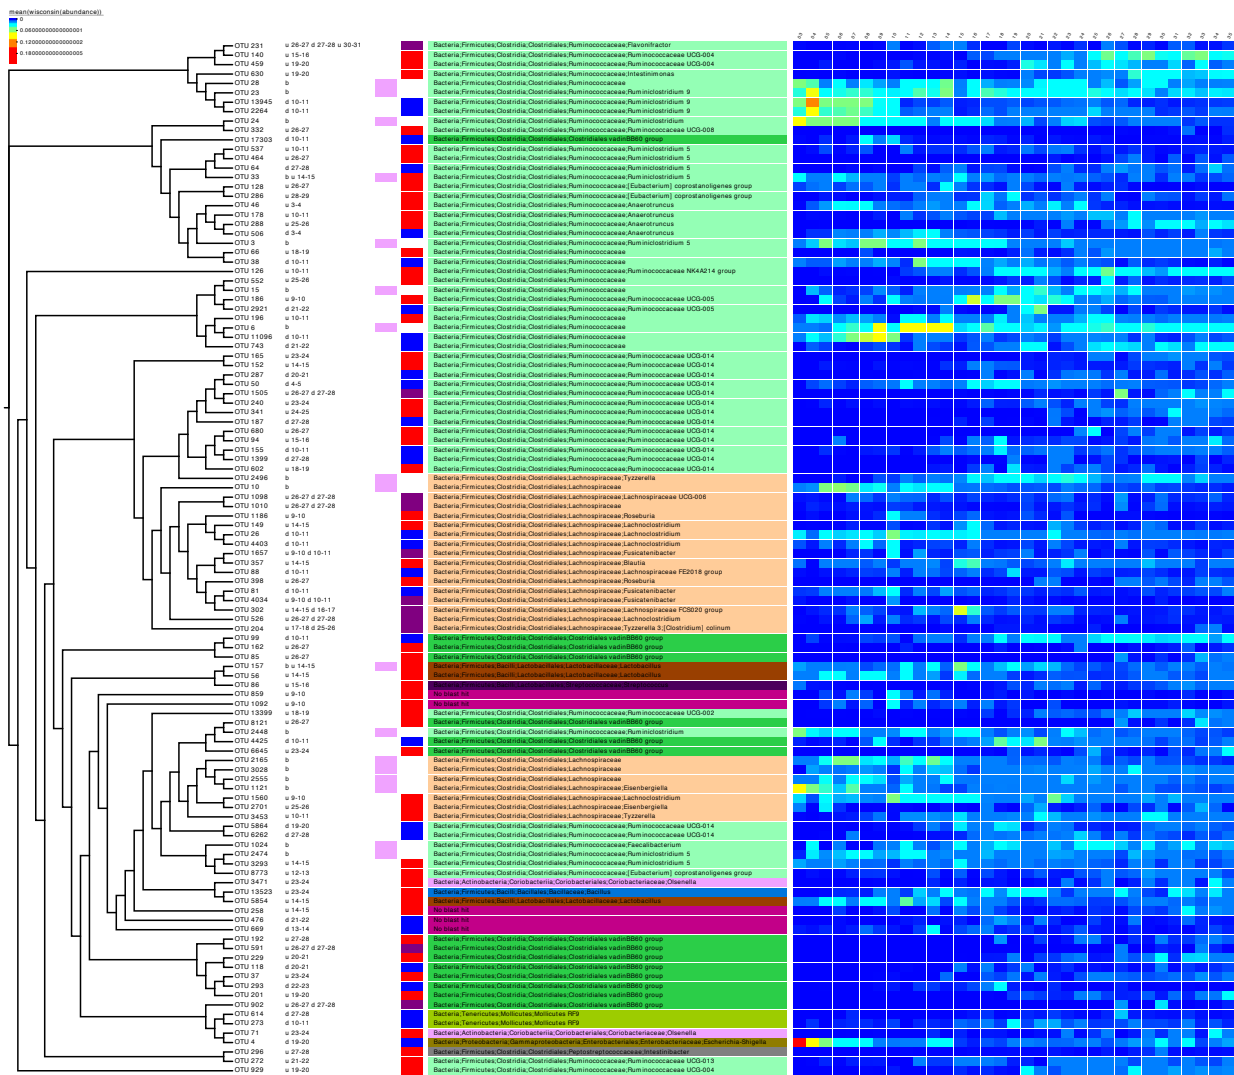

609  
 610 Figure 3: Phylogenetic tree of the subset of OTUs selected as significant on differential analysis (based on  
 611 Table 3 and Supplementary Table 1). Next to the OTU labels are descriptive text representing where the  
 612 OTUs were found to be significant, for example, the first entry for OTU 231, “u 26-27 d 27-28 u 30-31”,  
 613 can be read as upregulated going from day 26 to 27 and then from day 30 to 31 and downregulated going  
 614 from day 27 to 28. “b” represents the OTUs selected in the subset analysis. The next two columns are a  
 615 pictorial representation of the above-mentioned descriptive text with pink colour representing OTUs selected  
 616 in subset analysis, red colour for upregulated OTUs, blue for downregulated OTUs, and purple for OTUs  
 617 which show the both trends (up/down regulation). The next column shows the taxonomy of the OTUs  
 618 according to SILVA v123 with colouring at unique family level. The heatmap was drawn by collating the

619 mean values of OTUs for samples from the same day after performing proportional standardization on the  
620 full OTU table using wisconsin() function.  
621

622 Table 1: Statistics for beta dispersion comparison on daily microbiome data.

| Day Comparisons | Bray-Curtis      | Unweighted Unifrac | Weighted Unifrac |
|-----------------|------------------|--------------------|------------------|
| 3 - 4           | p = 0.018071 (*) | p = 0.18436        | p = 0.085112     |
| 4 - 5           | p = 0.85255      | p = 0.18547        | p = 0.25546      |
| 5 - 6           | p = 0.60961      | p = 0.1225         | p = 0.73468      |
| 6 - 7           | p = 0.82972      | p = 0.94104        | p = 0.21369      |
| 7 - 8           | p = 0.71257      | p = 0.88392        | p = 0.47401      |
| 8 - 9           | p = 0.060007     | p = 0.94453        | p = 0.36231      |
| 9 - 10          | p = 0.9966       | p = 0.11357        | p = 0.53314      |
| 10 - 11         | p = 0.20247      | p = 0.20845        | p = 0.13289      |
| 11 - 12         | p = 0.38794      | p = 0.014818 (*)   | p = 0.62198      |
| 12 - 13         | p = 0.88847      | p = 0.064143       | p = 0.013623 (*) |
| 13 - 14         | p = 0.63766      | p = 0.16696        | p = 0.41304      |
| 14 - 15         | p = 0.9467       | p = 0.64383        | p = 0.46855      |
| 15 - 16         | p = 0.89972      | p = 0.055618       | p = 0.79989      |
| 16 - 17         | p = 0.59807      | p = 0.37379        | p = 0.41167      |
| 17 - 18         | p = 0.70773      | p = 0.66013        | p = 0.30413      |
| 18 - 19         | p = 0.40112      | p = 0.92525        | p = 0.5994       |
| 19 - 20         | p = 0.020548 (*) | p = 0.087076       | p = 0.56858      |
| 20 - 21         | p = 0.033097 (*) | p = 0.12251        | p = 0.52086      |
| 21 - 22         | p = 0.29506      | p = 0.055585       | p = 0.90226      |
| 22 - 23         | p = 0.24688      | p = 0.90221        | p = 0.99695      |
| 23 - 24         | p = 0.79886      | p = 0.71275        | p = 0.34913      |
| 24 - 25         | p = 0.21019      | p = 0.67687        | p = 0.11096      |
| 25 - 26         | p = 0.14334      | p = 0.20716        | p = 0.97116      |
| 26 - 27         | p = 0.96286      | p = 0.044866 (*)   | p = 0.80425      |
| 27 - 28         | p = 0.50377      | p = 0.096107       | p = 0.1382       |
| 28 - 29         | p = 0.91052      | p = 0.87339        | p = 0.69398      |
| 29 - 30         | p = 0.34265      | p = 0.60245        | p = 0.11773      |
| 30 - 31         | p = 0.61843      | p = 0.55324        | p = 0.20403      |
| 31 - 32         | p = 0.24674      | p = 0.082761       | p = 0.50328      |
| 32 - 33         | p = 0.73392      | p = 0.53114        | p = 0.62586      |
| 33 - 34         | p = 0.7431       | p = 0.36694        | p = 0.57642      |
| 34 - 35         | p = 0.16111      | p = 0.20181        | p = 0.77382      |

623

624 Table 2: Statistics for pairwise beta dispersion and PERMANOVA when using different dissimilarity measures on weekly microbiome data. In beta  
625 dispersion analysis, the pair-wise differences in distances from group centre/mean were subjected to ANOVA after performing Principle Coordinate Analysis,  
626 and if significant ( $p \leq 0.05$ ) the values are shown. In PERMANOVA analysis,  $R^2$  represents the proportion of variability explained, for example, using  
627 “Groups” and “Bray-Curtis” dissimilarity, the weeks explain 16.8% variability in microbial community structure.

| Beta dispersion |          | Bray-Curtis                           | Unweighted Unifrac                    | Weighted Unifrac                      |
|-----------------|----------|---------------------------------------|---------------------------------------|---------------------------------------|
| Day03-07        | Day08-14 | $p = 0.0061142$ (**)                  | $p = 0.00014712$ (***)                | $p = 9.6914e-05$ (***)                |
|                 | Day15-24 | n.s.                                  | $p = 0.010418$ (*)                    | $p = 2.5203e-09$ (***)                |
|                 | Day25-35 | $p = 0.042066$ (*)                    | $p = 0.00015112$ (***)                | $p = 3.5789e-12$ (***)                |
| Day08-14        | Day15-24 | $p = 0.00077017$ (***)                | n.s.                                  | $p = 0.019953$ (*)                    |
|                 | Day25-35 | n.s.                                  | n.s.                                  | $p = 0.0011717$ (**)                  |
| Day15-24        | Day25-35 | $p = 0.0075651$ (**)                  | $p = 0.020128$ *                      | n.s.                                  |
| PERMANOVA       |          |                                       |                                       |                                       |
| Groups          |          | $R^2 = 0.16763$ ( $p = 0.001$ ) (***) | $R^2 = 0.06048$ ( $p = 0.001$ ) (***) | $R^2 = 0.17577$ ( $p = 0.001$ ) (***) |
| BW Mean         |          | $R^2 = 0.11721$ ( $p = 0.001$ ) (***) | $R^2 = 0.03964$ ( $p = 0.001$ ) (***) | $R^2 = 0.08723$ ( $p = 0.001$ ) (***) |
| FI              |          | $R^2 = 0.11856$ ( $p = 0.001$ ) (***) | $R^2 = 0.04069$ ( $p = 0.001$ ) (***) | $R^2 = 0.09301$ ( $p = 0.001$ ) (***) |
| FCR             |          | $R^2 = 0.1086$ ( $p = 0.001$ ) (***)  | $R^2 = 0.03842$ ( $p = 0.001$ ) (***) | $R^2 = 0.11787$ ( $p = 0.001$ ) (***) |
| Gain            |          | $R^2 = 0.11886$ ( $p = 0.001$ ) (***) | $R^2 = 0.04146$ ( $p = 0.001$ ) (***) | $R^2 = 0.0998$ ( $p = 0.001$ ) (***)  |

628 Table 3: Subset analysis from BVSTEP routine listing top 18 subsets with highest correlation with the full OTU table considering Bray-Curtis distance done on  
 629 weekly basis. For each subset, PERMANOVA was performed against different sources of variations.

| Subsets of top 1000 most abundant OTUs |                                                                                                                                                                       | Correlation with full OTU table (R) | PERMANOVA (full OTU table)        |                                   |                                   |                                   |                                   |
|----------------------------------------|-----------------------------------------------------------------------------------------------------------------------------------------------------------------------|-------------------------------------|-----------------------------------|-----------------------------------|-----------------------------------|-----------------------------------|-----------------------------------|
|                                        |                                                                                                                                                                       |                                     | Groups                            | BW_Mean                           | FI                                | FCR                               | Gain                              |
|                                        |                                                                                                                                                                       |                                     | $R^2 = 0.16763$ (p = 0.001) (***) | $R^2 = 0.11721$ (p = 0.001) (***) | $R^2 = 0.11856$ (p = 0.001) (***) | $R^2 = 0.1086$ (p = 0.001) (***)  | $R^2 = 0.11886$ (p = 0.001) (***) |
|                                        |                                                                                                                                                                       |                                     | PERMANOVA (subsets)               |                                   |                                   |                                   |                                   |
|                                        |                                                                                                                                                                       |                                     | Groups                            | BW_Mean                           | FI                                | FCR                               | Gain                              |
| S1                                     | OTU_2165 + OTU_2448 + OTU_33 + OTU_1121 + OTU_23 + OTU_2474 + OTU_6 + OTU_28 + OTU_157 + OTU_15 + OTU_24 + OTU_3028 + OTU_2496 + OTU_1024 + OTU_10 + OTU_3 + OTU_2555 | 0.833                               | $R^2 = 0.14768$ (p = 0.001) (***) | $R^2 = 0.10732$ (p = 0.001) (***) | $R^2 = 0.10784$ (p = 0.001) (***) | $R^2 = 0.10117$ (p = 0.001) (***) | $R^2 = 0.11143$ (p = 0.001) (***) |
| S2                                     | OTU_2165 + OTU_2448 + OTU_33 + OTU_1121 + OTU_23 + OTU_2474 + OTU_6 + OTU_28 + OTU_157 + OTU_15 + OTU_24 + OTU_3028 + OTU_2496 + OTU_1024 + OTU_3 + OTU_2555          | 0.83                                | $R^2 = 0.13977$ (p = 0.001) (***) | $R^2 = 0.10028$ (p = 0.001) (***) | $R^2 = 0.09987$ (p = 0.001) (***) | $R^2 = 0.09203$ (p = 0.001) (***) | $R^2 = 0.1025$ (p = 0.001) (***)  |
| S3                                     | OTU_2165 + OTU_2448 + OTU_33 + OTU_1121 + OTU_23 + OTU_2474 + OTU_6 + OTU_28 + OTU_157 + OTU_15 + OTU_24 + OTU_3028 + OTU_2496 + OTU_1024 + OTU_3                     | 0.827                               | $R^2 = 0.14186$ (p = 0.001) (***) | $R^2 = 0.10205$ (p = 0.001) (***) | $R^2 = 0.10165$ (p = 0.001) (***) | $R^2 = 0.09344$ (p = 0.001) (***) | $R^2 = 0.10435$ (p = 0.001) (***) |

|    |                                                                                                                                        |       |                                   |                                   |                                   |                                   |                                   |
|----|----------------------------------------------------------------------------------------------------------------------------------------|-------|-----------------------------------|-----------------------------------|-----------------------------------|-----------------------------------|-----------------------------------|
| S4 | OTU_2165 + OTU_2448 + OTU_33 + OTU_1121 + OTU_23 + OTU_2474 + OTU_6 + OTU_28 + OTU_157 + OTU_15 + OTU_24 + OTU_2496 + OTU_1024 + OTU_3 | 0.823 | $R^2 = 0.14241$ (p = 0.001) (***) | $R^2 = 0.10262$ (p = 0.001) (***) | $R^2 = 0.10228$ (p = 0.001) (***) | $R^2 = 0.0939$ (p = 0.001) (***)  | $R^2 = 0.10509$ (p = 0.001) (***) |
| S5 | OTU_2165 + OTU_2448 + OTU_33 + OTU_1121 + OTU_23 + OTU_2474 + OTU_6 + OTU_28 + OTU_15 + OTU_24 + OTU_2496 + OTU_1024 + OTU_3           | 0.816 | $R^2 = 0.14289$ (p = 0.001) (***) | $R^2 = 0.10313$ (p = 0.001) (***) | $R^2 = 0.10279$ (p = 0.001) (***) | $R^2 = 0.09436$ (p = 0.001) (***) | $R^2 = 0.1056$ (p = 0.001) (***)  |
| S6 | OTU_2165 + OTU_2448 + OTU_33 + OTU_1121 + OTU_23 + OTU_2474 + OTU_6 + OTU_28 + OTU_15 + OTU_24 + OTU_2496 + OTU_1024                   | 0.809 | $R^2 = 0.14742$ (p = 0.001) (***) | $R^2 = 0.10587$ (p = 0.001) (***) | $R^2 = 0.10556$ (p = 0.001) (***) | $R^2 = 0.098$ (p = 0.001) (***)   | $R^2 = 0.1084$ (p = 0.001) (***)  |
| S7 | OTU_2165 + OTU_2448 + OTU_33 + OTU_1121 + OTU_2474 + OTU_6 + OTU_28 + OTU_15 + OTU_24 + OTU_2496 + OTU_1024                            | 0.799 | $R^2 = 0.17779$ (p = 0.001) (***) | $R^2 = 0.12583$ (p = 0.001) (***) | $R^2 = 0.12598$ (p = 0.001) (***) | $R^2 = 0.11968$ (p = 0.001) (***) | $R^2 = 0.12936$ (p = 0.001) (***) |
| S8 | OTU_2165 + OTU_2448 + OTU_33 + OTU_1121 + OTU_2474 + OTU_6 + OTU_28 + OTU_15 + OTU_24 + OTU_2496                                       | 0.789 | $R^2 = 0.14605$ (p = 0.001) (***) | $R^2 = 0.0875$ (p = 0.001) (***)  | $R^2 = 0.08646$ (p = 0.001) (***) | $R^2 = 0.08927$ (p = 0.001) (***) | $R^2 = 0.08866$ (p = 0.001) (***) |
| S9 | OTU_2165 + OTU_2448 + OTU_33 + OTU_1121 + OTU_2474 + OTU_28 + OTU_15 + OTU_24 + OTU_2496                                               | 0.777 | $R^2 = 0.14132$ (p = 0.001) (***) | $R^2 = 0.10216$ (p = 0.001) (***) | $R^2 = 0.10313$ (p = 0.001) (***) | $R^2 = 0.0989$ (p = 0.001) (***)  | $R^2 = 0.10736$ (p = 0.001) (***) |

|     |                                                                               |       |                                            |                                            |                                            |                                            |                                            |
|-----|-------------------------------------------------------------------------------|-------|--------------------------------------------|--------------------------------------------|--------------------------------------------|--------------------------------------------|--------------------------------------------|
| S10 | OTU_2165 + OTU_2448 + OTU_33 + OTU_1121 + OTU_2474 + OTU_28 + OTU_15 + OTU_24 | 0.763 | R <sup>2</sup> = 0.13922 (p = 0.001) (***) | R <sup>2</sup> = 0.10051 (p = 0.001) (***) | R <sup>2</sup> = 0.10121 (p = 0.001) (***) | R <sup>2</sup> = 0.09676 (p = 0.001) (***) | R <sup>2</sup> = 0.10532 (p = 0.001) (***) |
| S11 | OTU_2165 + OTU_2448 + OTU_33 + OTU_1121 + OTU_2474 + OTU_28 + OTU_15          | 0.746 | R <sup>2</sup> = 0.13173 (p = 0.001) (***) | R <sup>2</sup> = 0.09081 (p = 0.001) (***) | R <sup>2</sup> = 0.09291 (p = 0.001) (***) | R <sup>2</sup> = 0.09023 (p = 0.001) (***) | R <sup>2</sup> = 0.09828 (p = 0.001) (***) |
| S12 | OTU_2165 + OTU_2448 + OTU_33 + OTU_1121 + OTU_2474 + OTU_28                   | 0.723 | R <sup>2</sup> = 0.09574 (p = 0.001) (***) | R <sup>2</sup> = 0.04819 (p = 0.001) (***) | R <sup>2</sup> = 0.04936 (p = 0.001) (***) | R <sup>2</sup> = 0.05663 (p = 0.001) (***) | R <sup>2</sup> = 0.05163 (p = 0.001) (***) |
| S13 | OTU_2165 + OTU_2448 + OTU_33 + OTU_1121 + OTU_2474                            | 0.696 | R <sup>2</sup> = 0.0952 (p = 0.001) (***)  | R <sup>2</sup> = 0.04875 (p = 0.001) (***) | R <sup>2</sup> = 0.05019 (p = 0.001) (***) | R <sup>2</sup> = 0.05606 (p = 0.001) (***) | R <sup>2</sup> = 0.05246 (p = 0.001) (***) |
| S14 | OTU_2165 + OTU_2448 + OTU_1121 + OTU_2474                                     | 0.661 | R <sup>2</sup> = 0.10232 (p = 0.001) (***) | R <sup>2</sup> = 0.05483 (p = 0.001) (***) | R <sup>2</sup> = 0.05623 (p = 0.001) (***) | R <sup>2</sup> = 0.06108 (p = 0.001) (***) | R <sup>2</sup> = 0.05869 (p = 0.001) (***) |
| S15 | OTU_2448 + OTU_33 + OTU_1121 + OTU_2474                                       | 0.655 | R <sup>2</sup> = 0.06994 (p = 0.001) (***) | R <sup>2</sup> = 0.02489 (p = 0.001) (***) | R <sup>2</sup> = 0.02416 (p = 0.001) (***) | R <sup>2</sup> = 0.03155 (p = 0.001) (***) | R <sup>2</sup> = 0.02375 (p = 0.001) (***) |
| S16 | OTU_2448 + OTU_33 + OTU_2474                                                  | 0.604 | R <sup>2</sup> = 0.03489 (p = 0.001) (***) | R <sup>2</sup> = 0.01348 (p = 0.003) (**)  | R <sup>2</sup> = 0.01238 (p = 0.005) (**)  | R <sup>2</sup> = 0.01154 (p = 0.006) (**)  | R <sup>2</sup> = 0.01053 (p = 0.012) (*)   |
| S17 | OTU_33 + OTU_1121 + OTU_2474                                                  | 0.599 | R <sup>2</sup> = 0.06662 (p = 0.001) (***) | R <sup>2</sup> = 0.01995 (p = 0.001) (***) | R <sup>2</sup> = 0.02047 (p = 0.001) (***) | R <sup>2</sup> = 0.03201 (p = 0.001) (***) | R <sup>2</sup> = 0.02183 (p = 0.001) (***) |
| S18 | OTU_1121 + OTU_2474                                                           | 0.538 | R <sup>2</sup> = 0.07 (p = 0.001) (***)    | R <sup>2</sup> = 0.02571 (p = 0.001) (***) | R <sup>2</sup> = 0.02628 (p = 0.001) (***) | R <sup>2</sup> = 0.03796 (p = 0.001) (***) | R <sup>2</sup> = 0.02793 (p = 0.001) (***) |

OTU\_2165: Bacteria; Firmicutes; Clostridia; Clostridiales; Lachnospiraceae  
OTU\_2448: Bacteria; Firmicutes; Clostridia; Clostridiales; Ruminococcaceae; Ruminiclostridium  
OTU\_33: Bacteria; Firmicutes; Clostridia; Clostridiales; Ruminococcaceae; Ruminiclostridium 5  
OTU\_1121: Bacteria; Firmicutes; Clostridia; Clostridiales; Lachnospiraceae; Eisenbergiella  
OTU\_23: Bacteria; Firmicutes; Clostridia; Clostridiales; Ruminococcaceae; Ruminiclostridium 9  
OTU\_2474: Bacteria; Firmicutes; Clostridia; Clostridiales; Ruminococcaceae; Ruminiclostridium 5  
OTU\_6: Bacteria; Firmicutes; Clostridia; Clostridiales; Ruminococcaceae  
OTU\_28: Bacteria; Firmicutes; Clostridia; Clostridiales; Ruminococcaceae  
OTU\_157: Bacteria; Firmicutes; Bacilli; Lactobacillales; Lactobacillaceae; Lactobacillus  
OTU\_15: Bacteria; Firmicutes; Clostridia; Clostridiales; Ruminococcaceae  
OTU\_24: Bacteria; Firmicutes; Clostridia; Clostridiales; Ruminococcaceae; Ruminiclostridium  
OTU\_3028: Bacteria; Firmicutes; Clostridia; Clostridiales; Lachnospiraceae



OTU\_2496: Bacteria; Firmicutes; Clostridia; Clostridiales; Lachnospiraceae; Tyzzerella  
OTU\_1024: Bacteria; Firmicutes; Clostridia; Clostridiales; Ruminococcaceae; Faecalibacterium  
OTU\_10: Bacteria; Firmicutes; Clostridia; Clostridiales; Lachnospiraceae  
OTU\_3: Bacteria; Firmicutes; Clostridia; Clostridiales; Ruminococcaceae; Ruminiclostridium 5  
OTU\_2555: Bacteria; Firmicutes; Clostridia; Clostridiales; Lachnospiraceae

630

631 Supplementary Figure 1: Spatial arrangement of pens. Triangles indicate pens with *Campylobacter*.

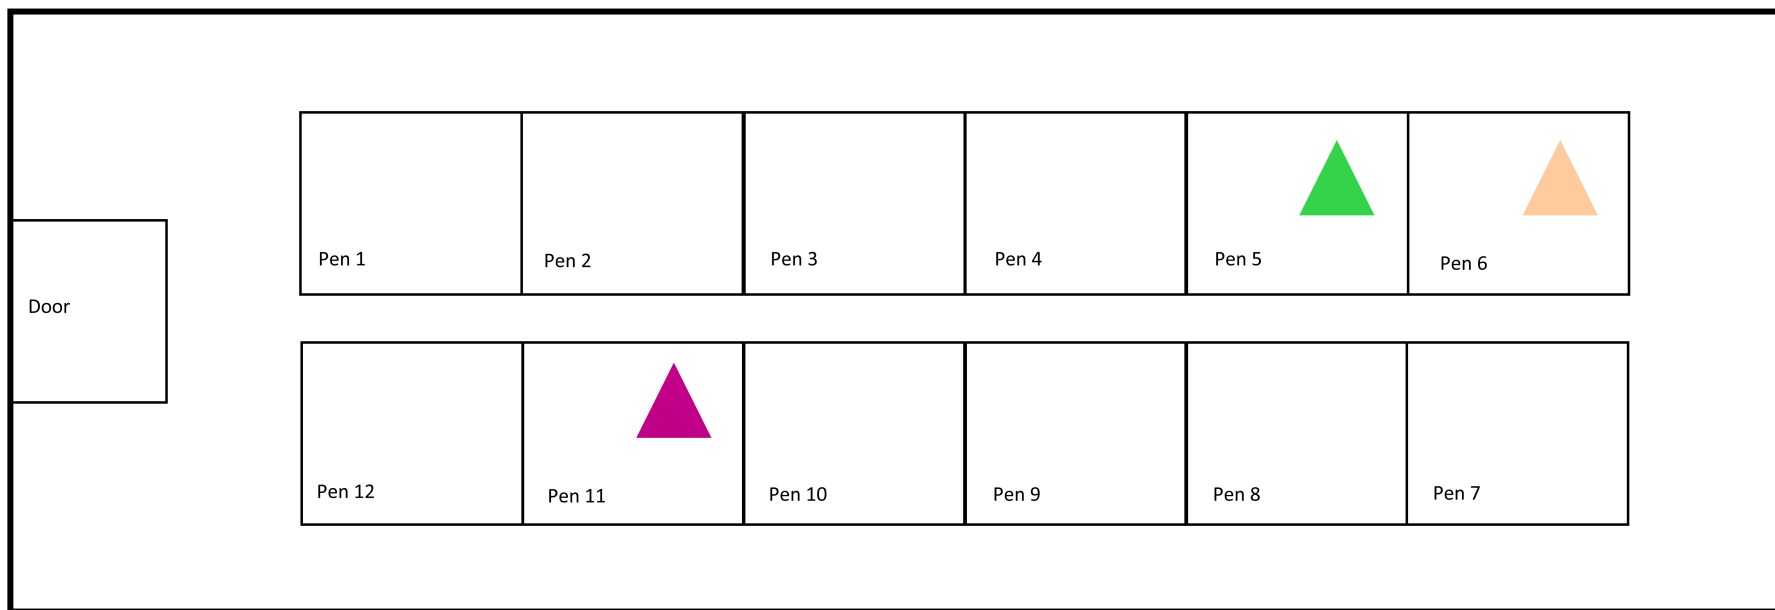

632

633 Supplementary Figure 2: Relative abundance of 50 most abundant genera in this study.

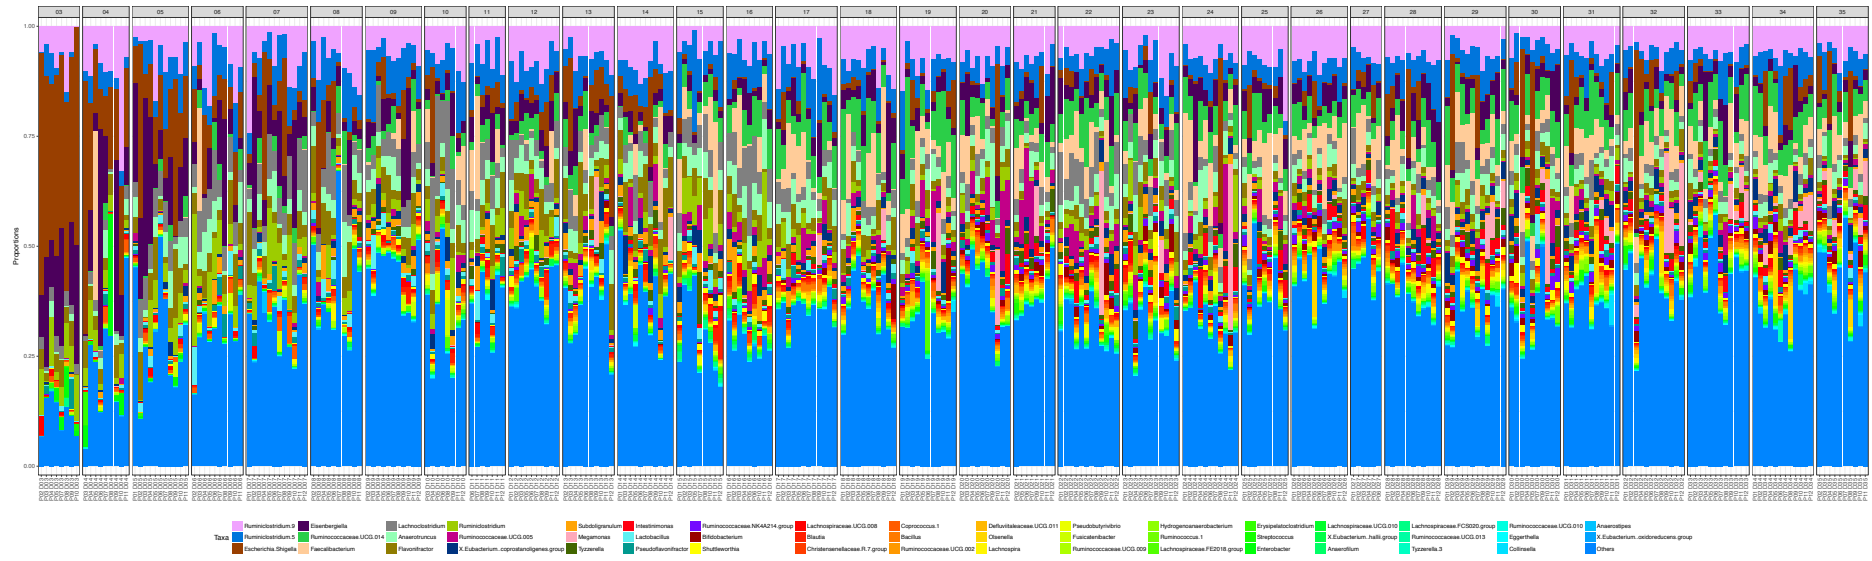

634

635 Supplementary Table 1: Differential analysis of OTUs that are up/down-regulated between different groups (Adjusted P values  $\leq 0.05$ ) where positive log<sub>2</sub> fold  
 636 change represent OTUs becoming abundant as we go forward in time. Here only the significant OTUs are shown for both daily and weekly comparisons.

| OTUs                                                                                               | Base Mean Abundance | Log <sub>2</sub> Fold Change | Group Comparison |
|----------------------------------------------------------------------------------------------------|---------------------|------------------------------|------------------|
| OTU_46 Bacteria;Firmicutes;Clostridia;Clostridiales;Ruminococcaceae;Anaerotruncus                  | 85.84               | 2.11                         | 03-04            |
| OTU_504 No blast hit                                                                               | 10.63               | -2.01                        | 03-04            |
| OTU_50 Bacteria;Firmicutes;Clostridia;Clostridiales;Ruminococcaceae;Ruminococcaceae UCG-014        | 20.53               | -2.24                        | 04-05            |
| OTU_1186 Bacteria;Firmicutes;Clostridia;Clostridiales;Lachnospiraceae;Roseburia                    | 9.07                | 2.40                         | 09-10            |
| OTU_1560 Bacteria;Firmicutes;Clostridia;Clostridiales;Lachnospiraceae;Lachnoclostridium            | 1405.48             | 2.11                         | 09-10            |
| OTU_859 No blast hit                                                                               | 5.11                | 2.22                         | 09-10            |
| OTU_1657 Bacteria;Firmicutes;Clostridia;Clostridiales;Lachnospiraceae;Fusicatenibacter             | 4.98                | 2.12                         | 09-10            |
| OTU_186 Bacteria;Firmicutes;Clostridia;Clostridiales;Ruminococcaceae;Ruminococcaceae UCG-005       | 28.35               | 2.19                         | 09-10            |
| OTU_1092 No blast hit                                                                              | 4.39                | 2.05                         | 09-10            |
| OTU_4034 Bacteria;Firmicutes;Clostridia;Clostridiales;Lachnospiraceae;Fusicatenibacter             | 5.71                | 2.10                         | 09-10            |
| OTU_537 Bacteria;Firmicutes;Clostridia;Clostridiales;Ruminococcaceae;Ruminiclostridium 5           | 4.95                | 2.05                         | 10-11            |
| OTU_196 Bacteria;Firmicutes;Clostridia;Clostridiales;Ruminococcaceae                               | 21.31               | 2.29                         | 10-11            |
| OTU_3453 Bacteria;Firmicutes;Clostridia;Clostridiales;Lachnospiraceae;Tyzzerella                   | 145.35              | 2.32                         | 10-11            |
| OTU_126 Bacteria;Firmicutes;Clostridia;Clostridiales;Ruminococcaceae;Ruminococcaceae NK4A214 group | 7.97                | 2.34                         | 10-11            |
| OTU_178 Bacteria;Firmicutes;Clostridia;Clostridiales;Ruminococcaceae;Anaerotruncus                 | 19.30               | 3.14                         | 10-11            |
| OTU_13945 Bacteria;Firmicutes;Clostridia;Clostridiales;Ruminococcaceae;Ruminiclostridium 9         | 18.09               | -2.92                        | 10-11            |
| OTU_11096 Bacteria;Firmicutes;Clostridia;Clostridiales;Ruminococcaceae                             | 7.83                | -2.30                        | 10-11            |
| OTU_16519 Bacteria;Firmicutes;Clostridia;Clostridiales;Ruminococcaceae                             | 7.75                | -2.29                        | 10-11            |
| OTU_155 Bacteria;Firmicutes;Clostridia;Clostridiales;Ruminococcaceae;Ruminococcaceae UCG-014       | 27.48               | -2.25                        | 10-11            |
| OTU_99 Bacteria;Firmicutes;Clostridia;Clostridiales;Clostridiales vadinBB60 group                  | 46.84               | -2.24                        | 10-11            |
| OTU_4425 Bacteria;Firmicutes;Clostridia;Clostridiales;Clostridiales vadinBB60 group                | 53.73               | -2.24                        | 10-11            |
| OTU_2264 Bacteria;Firmicutes;Clostridia;Clostridiales;Ruminococcaceae;Ruminiclostridium 9          | 12.43               | -2.23                        | 10-11            |
| OTU_4403 Bacteria;Firmicutes;Clostridia;Clostridiales;Lachnospiraceae;Lachnoclostridium            | 7.48                | -2.21                        | 10-11            |
| OTU_273 Bacteria;Tenericutes;Mollicutes;Mollicutes RF9                                             | 9.76                | -2.20                        | 10-11            |
| OTU_81 Bacteria;Firmicutes;Clostridia;Clostridiales;Lachnospiraceae;Fusicatenibacter               | 650.85              | -2.17                        | 10-11            |
| OTU_17303 Bacteria;Firmicutes;Clostridia;Clostridiales;Clostridiales vadinBB60 group               | 23.24               | -2.17                        | 10-11            |
| OTU_38 Bacteria;Firmicutes;Clostridia;Clostridiales;Ruminococcaceae                                | 678.29              | -2.14                        | 10-11            |
| OTU_88 Bacteria;Firmicutes;Clostridia;Clostridiales;Lachnospiraceae;Lachnospiraceae FE2018 group   | 496.93              | -2.11                        | 10-11            |

|           |                                                                                                       |         |       |       |
|-----------|-------------------------------------------------------------------------------------------------------|---------|-------|-------|
| OTU_26    | Bacteria;Firmicutes;Clostridia;Clostridiales;Lachnospiraceae;Lachnoclostridium                        | 5197.77 | -2.06 | 10-11 |
| OTU_1657  | Bacteria;Firmicutes;Clostridia;Clostridiales;Lachnospiraceae;Fusicatenibacter                         | 6.10    | -2.06 | 10-11 |
| OTU_4034  | Bacteria;Firmicutes;Clostridia;Clostridiales;Lachnospiraceae;Fusicatenibacter                         | 7.03    | -2.04 | 10-11 |
| OTU_8773  | Bacteria;Firmicutes;Clostridia;Clostridiales;Ruminococcaceae;[Eubacterium] coprostanoligenes group    | 27.71   | 2.03  | 12-13 |
| OTU_669   | No blast hit                                                                                          | 8.63    | -2.03 | 13-14 |
| OTU_5854  | Bacteria;Firmicutes;Bacilli;Lactobacillales;Lactobacillaceae;Lactobacillus                            | 277.21  | 2.44  | 14-15 |
| OTU_56    | Bacteria;Firmicutes;Bacilli;Lactobacillales;Lactobacillaceae;Lactobacillus                            | 446.98  | 2.41  | 14-15 |
| OTU_157   | Bacteria;Firmicutes;Bacilli;Lactobacillales;Lactobacillaceae;Lactobacillus                            | 225.97  | 2.43  | 14-15 |
| OTU_302   | Bacteria;Firmicutes;Clostridia;Clostridiales;Lachnospiraceae;Lachnospiraceae FCS020 group             | 86.06   | 2.37  | 14-15 |
| OTU_152   | Bacteria;Firmicutes;Clostridia;Clostridiales;Ruminococcaceae;Ruminococcaceae UCG-014                  | 29.02   | 2.38  | 14-15 |
| OTU_149   | Bacteria;Firmicutes;Clostridia;Clostridiales;Lachnospiraceae;Lachnoclostridium                        | 182.29  | 2.34  | 14-15 |
| OTU_258   | No blast hit                                                                                          | 11.99   | 2.28  | 14-15 |
| OTU_3293  | Bacteria;Firmicutes;Clostridia;Clostridiales;Ruminococcaceae;Ruminiclostridium 5                      | 318.03  | 2.20  | 14-15 |
| OTU_33    | Bacteria;Firmicutes;Clostridia;Clostridiales;Ruminococcaceae;Ruminiclostridium 5                      | 815.02  | 2.14  | 14-15 |
| OTU_357   | Bacteria;Firmicutes;Clostridia;Clostridiales;Lachnospiraceae;Blautia                                  | 21.50   | 2.10  | 14-15 |
| OTU_86    | Bacteria;Firmicutes;Bacilli;Lactobacillales;Streptococcaceae;Streptococcus                            | 11.32   | 2.19  | 15-16 |
| OTU_140   | Bacteria;Firmicutes;Clostridia;Clostridiales;Ruminococcaceae;Ruminococcaceae UCG-004                  | 12.64   | 2.17  | 15-16 |
| OTU_94    | Bacteria;Firmicutes;Clostridia;Clostridiales;Ruminococcaceae;Ruminococcaceae UCG-014                  | 277.06  | 2.06  | 15-16 |
| OTU_302   | Bacteria;Firmicutes;Clostridia;Clostridiales;Lachnospiraceae;Lachnospiraceae FCS020 group             | 62.39   | -2.00 | 16-17 |
| OTU_204   | Bacteria;Firmicutes;Clostridia;Clostridiales;Lachnospiraceae;Tyzzerella 3;[Clostridium] colinum       | 29.20   | 2.49  | 17-18 |
| OTU_602   | Bacteria;Firmicutes;Clostridia;Clostridiales;Ruminococcaceae;Ruminococcaceae UCG-014                  | 94.56   | 2.40  | 18-19 |
| OTU_13399 | Bacteria;Firmicutes;Clostridia;Clostridiales;Ruminococcaceae;Ruminococcaceae UCG-002                  | 10.76   | 2.07  | 18-19 |
| OTU_66    | Bacteria;Firmicutes;Clostridia;Clostridiales;Ruminococcaceae                                          | 25.13   | 2.02  | 18-19 |
| OTU_201   | Bacteria;Firmicutes;Clostridia;Clostridiales;Clostridiales vadinBB60 group                            | 17.76   | 2.11  | 19-20 |
| OTU_459   | Bacteria;Firmicutes;Clostridia;Clostridiales;Ruminococcaceae;Ruminococcaceae UCG-004                  | 7.79    | 2.16  | 19-20 |
| OTU_929   | Bacteria;Firmicutes;Clostridia;Clostridiales;Ruminococcaceae;Ruminococcaceae UCG-004                  | 10.94   | 2.40  | 19-20 |
| OTU_630   | Bacteria;Firmicutes;Clostridia;Clostridiales;Ruminococcaceae;Intestinimonas                           | 22.84   | 2.42  | 19-20 |
| OTU_4     | Bacteria;Proteobacteria;Gammaproteobacteria;Enterobacteriales;Enterobacteriaceae;Escherichia-Shigella | 1987.33 | -2.25 | 19-20 |
| OTU_5864  | Bacteria;Firmicutes;Clostridia;Clostridiales;Ruminococcaceae;Ruminococcaceae UCG-014                  | 302.73  | -2.21 | 19-20 |
| OTU_229   | Bacteria;Firmicutes;Clostridia;Clostridiales;Clostridiales vadinBB60 group                            | 13.95   | 2.13  | 20-21 |
| OTU_287   | Bacteria;Firmicutes;Clostridia;Clostridiales;Ruminococcaceae;Ruminococcaceae UCG-014                  | 65.90   | -2.13 | 20-21 |
| OTU_118   | Bacteria;Firmicutes;Clostridia;Clostridiales;Clostridiales vadinBB60 group                            | 195.16  | -2.07 | 20-21 |
| OTU_272   | Bacteria;Firmicutes;Clostridia;Clostridiales;Ruminococcaceae;Ruminococcaceae UCG-013                  | 26.90   | 2.31  | 21-22 |

|           |                                                                                                    |        |       |       |
|-----------|----------------------------------------------------------------------------------------------------|--------|-------|-------|
| OTU_2921  | Bacteria;Firmicutes;Clostridia;Clostridiales;Ruminococcaceae;Ruminococcaceae UCG-005               | 6.80   | -2.17 | 21-22 |
| OTU_743   | Bacteria;Firmicutes;Clostridia;Clostridiales;Ruminococcaceae                                       | 5.46   | -2.03 | 21-22 |
| OTU_476   | No blast hit                                                                                       | 8.71   | -2.01 | 21-22 |
| OTU_293   | Bacteria;Firmicutes;Clostridia;Clostridiales;Clostridiales vadinBB60 group                         | 24.80  | -2.17 | 22-23 |
| OTU_71    | Bacteria;Actinobacteria;Coriobacteriia;Coriobacteriales;Coriobacteriaceae;Olsenella                | 28.83  | 2.26  | 23-24 |
| OTU_3471  | Bacteria;Actinobacteria;Coriobacteriia;Coriobacteriales;Coriobacteriaceae;Olsenella                | 17.11  | 2.30  | 23-24 |
| OTU_165   | Bacteria;Firmicutes;Clostridia;Clostridiales;Ruminococcaceae;Ruminococcaceae UCG-014               | 18.76  | 2.16  | 23-24 |
| OTU_6645  | Bacteria;Firmicutes;Clostridia;Clostridiales;Clostridiales vadinBB60 group                         | 16.81  | 2.14  | 23-24 |
| OTU_240   | Bacteria;Firmicutes;Clostridia;Clostridiales;Ruminococcaceae;Ruminococcaceae UCG-014               | 66.78  | 2.13  | 23-24 |
| OTU_13523 | Bacteria;Firmicutes;Bacilli;Bacillales;Bacillaceae;Bacillus                                        | 137.89 | 2.01  | 23-24 |
| OTU_37    | Bacteria;Firmicutes;Clostridia;Clostridiales;Clostridiales vadinBB60 group                         | 310.22 | 2.12  | 23-24 |
| OTU_341   | Bacteria;Firmicutes;Clostridia;Clostridiales;Ruminococcaceae;Ruminococcaceae UCG-014               | 12.91  | 2.25  | 24-25 |
| OTU_288   | Bacteria;Firmicutes;Clostridia;Clostridiales;Ruminococcaceae;Anaerotruncus                         | 29.58  | 2.07  | 25-26 |
| OTU_552   | Bacteria;Firmicutes;Clostridia;Clostridiales;Ruminococcaceae                                       | 326.78 | 2.10  | 25-26 |
| OTU_2701  | Bacteria;Firmicutes;Clostridia;Clostridiales;Lachnospiraceae;Eisenbergiella                        | 19.60  | 2.12  | 25-26 |
| OTU_204   | Bacteria;Firmicutes;Clostridia;Clostridiales;Lachnospiraceae;Tyzzerella 3;[Clostridium] colinum    | 14.58  | -2.14 | 25-26 |
| OTU_128   | Bacteria;Firmicutes;Clostridia;Clostridiales;Ruminococcaceae;[Eubacterium] coprostanoligenes group | 71.82  | 2.91  | 26-27 |
| OTU_398   | Bacteria;Firmicutes;Clostridia;Clostridiales;Lachnospiraceae;Roseburia                             | 13.92  | 2.79  | 26-27 |
| OTU_85    | Bacteria;Firmicutes;Clostridia;Clostridiales;Clostridiales vadinBB60 group                         | 782.32 | 2.68  | 26-27 |
| OTU_591   | Bacteria;Firmicutes;Clostridia;Clostridiales;Clostridiales vadinBB60 group                         | 10.78  | 2.63  | 26-27 |
| OTU_680   | Bacteria;Firmicutes;Clostridia;Clostridiales;Ruminococcaceae;Ruminococcaceae UCG-014               | 13.73  | 2.63  | 26-27 |
| OTU_1505  | Bacteria;Firmicutes;Clostridia;Clostridiales;Ruminococcaceae;Ruminococcaceae UCG-014               | 9.09   | 2.48  | 26-27 |
| OTU_8121  | Bacteria;Firmicutes;Clostridia;Clostridiales;Clostridiales vadinBB60 group                         | 299.08 | 2.53  | 26-27 |
| OTU_902   | Bacteria;Firmicutes;Clostridia;Clostridiales;Clostridiales vadinBB60 group                         | 9.22   | 2.55  | 26-27 |
| OTU_526   | Bacteria;Firmicutes;Clostridia;Clostridiales;Lachnospiraceae;Lachnoclostridium                     | 34.07  | 2.42  | 26-27 |
| OTU_231   | Bacteria;Firmicutes;Clostridia;Clostridiales;Ruminococcaceae;Flavonifractor                        | 30.02  | 2.46  | 26-27 |
| OTU_1010  | Bacteria;Firmicutes;Clostridia;Clostridiales;Lachnospiraceae                                       | 9.02   | 2.33  | 26-27 |
| OTU_464   | Bacteria;Firmicutes;Clostridia;Clostridiales;Ruminococcaceae;Ruminiclostridium 5                   | 5.89   | 2.28  | 26-27 |
| OTU_332   | Bacteria;Firmicutes;Clostridia;Clostridiales;Ruminococcaceae;Ruminococcaceae UCG-008               | 7.27   | 2.21  | 26-27 |
| OTU_162   | Bacteria;Firmicutes;Clostridia;Clostridiales;Clostridiales vadinBB60 group                         | 8.07   | 2.07  | 26-27 |
| OTU_1098  | Bacteria;Firmicutes;Clostridia;Clostridiales;Lachnospiraceae;Lachnospiraceae UCG-006               | 6.95   | 2.04  | 26-27 |
| OTU_192   | Bacteria;Firmicutes;Clostridia;Clostridiales;Clostridiales vadinBB60 group                         | 35.57  | 2.16  | 27-28 |
| OTU_296   | Bacteria;Firmicutes;Clostridia;Clostridiales;Peptostreptococcaceae;Intestinibacter                 | 24.92  | 2.19  | 27-28 |
| OTU_187   | Bacteria;Firmicutes;Clostridia;Clostridiales;Ruminococcaceae;Ruminococcaceae UCG-014               | 30.56  | -3.16 | 27-28 |
| OTU_64    | Bacteria;Firmicutes;Clostridia;Clostridiales;Ruminococcaceae;Ruminiclostridium 5                   | 710.20 | -3.01 | 27-28 |

|                                                                                                                        |        |       |                   |
|------------------------------------------------------------------------------------------------------------------------|--------|-------|-------------------|
| OTU_591 Bacteria;Firmicutes;Clostridia;Clostridiales;Clostridiales vadinBB60 group                                     | 10.79  | -2.72 | 27-28             |
| OTU_231 Bacteria;Firmicutes;Clostridia;Clostridiales;Ruminococcaceae;Flavonifractor                                    | 29.68  | -2.71 | 27-28             |
| OTU_902 Bacteria;Firmicutes;Clostridia;Clostridiales;Clostridiales vadinBB60 group                                     | 9.22   | -2.63 | 27-28             |
| OTU_1505 Bacteria;Firmicutes;Clostridia;Clostridiales;Ruminococcaceae;Ruminococcaceae UCG-014                          | 9.36   | -2.34 | 27-28             |
| OTU_614 Bacteria;Tenericutes;Mollicutes;Mollicutes RF9                                                                 | 14.55  | -2.34 | 27-28             |
| OTU_1010 Bacteria;Firmicutes;Clostridia;Clostridiales;Lachnospiraceae                                                  | 9.09   | -2.33 | 27-28             |
| OTU_1098 Bacteria;Firmicutes;Clostridia;Clostridiales;Lachnospiraceae;Lachnospiraceae UCG-006                          | 6.77   | -2.23 | 27-28             |
| OTU_6262 Bacteria;Firmicutes;Clostridia;Clostridiales;Ruminococcaceae;Ruminococcaceae UCG-014                          | 431.75 | -2.13 | 27-28             |
| OTU_526 Bacteria;Firmicutes;Clostridia;Clostridiales;Lachnospiraceae;Lachnoclostridium                                 | 35.09  | -2.12 | 27-28             |
| OTU_1399 Bacteria;Firmicutes;Clostridia;Clostridiales;Ruminococcaceae;Ruminococcaceae UCG-014                          | 4.77   | -2.03 | 27-28             |
| OTU_286 Bacteria;Firmicutes;Clostridia;Clostridiales;Ruminococcaceae;[Eubacterium] coprostanoligenes group             | 29.74  | 2.15  | 28-29             |
| OTU_231 Bacteria;Firmicutes;Clostridia;Clostridiales;Ruminococcaceae;Flavonifractor                                    | 41.42  | 2.04  | 30-31             |
| OTU_95 Bacteria;Firmicutes;Clostridia;Clostridiales;Ruminococcaceae;Subdoligranulum                                    | 81.73  | 5.92  | Day03-07-Day08-14 |
| OTU_248 Bacteria;Firmicutes;Clostridia;Clostridiales;Ruminococcaceae;Faecalibacterium                                  | 43.97  | 5.71  | Day03-07-Day08-14 |
| OTU_155 Bacteria;Firmicutes;Clostridia;Clostridiales;Ruminococcaceae;Ruminococcaceae UCG-014                           | 24.39  | 5.05  | Day03-07-Day08-14 |
| OTU_172 Bacteria;Firmicutes;Clostridia;Clostridiales;Ruminococcaceae;Ruminiclostridium 5                               | 25.21  | 4.76  | Day03-07-Day08-14 |
| OTU_136 Bacteria;Proteobacteria;Gammaproteobacteria;Enterobacteriales;Enterobacteriaceae;Enterobacter                  | 217.12 | -5.40 | Day03-07-Day08-14 |
| OTU_195 Bacteria;Firmicutes;Clostridia;Clostridiales;Lachnospiraceae;Pseudobutyriovibrio                               | 72.67  | 4.13  | Day03-07-Day08-14 |
| OTU_1016 Bacteria;Firmicutes;Bacilli;Lactobacillales;Enterococcaceae;Enterococcus;unidentified marine bacterioplankton | 7.52   | -3.91 | Day03-07-Day08-14 |
| OTU_343 Bacteria;Firmicutes;Clostridia;Clostridiales;Ruminococcaceae;Ruminiclostridium 9                               | 13.41  | 4.16  | Day03-07-Day08-14 |
| OTU_6332 Bacteria;Firmicutes;Clostridia;Clostridiales;Ruminococcaceae;Flavonifractor                                   | 92.80  | -4.83 | Day03-07-Day08-14 |
| OTU_293 Bacteria;Firmicutes;Clostridia;Clostridiales;Clostridiales vadinBB60 group                                     | 16.96  | 4.83  | Day03-07-Day08-14 |
| OTU_336 Bacteria;Firmicutes;Bacilli;Lactobacillales;Enterococcaceae;Enterococcus;Enterococcus faecium DO               | 21.88  | -3.91 | Day03-07-Day08-14 |
| OTU_113 Bacteria;Firmicutes;Clostridia;Clostridiales;Ruminococcaceae;Flavonifractor                                    | 299.35 | -5.09 | Day03-07-Day08-14 |



|                                                                                                                                         |        |       |                   |
|-----------------------------------------------------------------------------------------------------------------------------------------|--------|-------|-------------------|
| OTU_4065 Bacteria;Firmicutes;Clostridia;Clostridiales;Ruminococcaceae;Subdoligranulum                                                   | 39.33  | 3.86  | Day03-07-Day08-14 |
| OTU_170 Bacteria;Firmicutes;Clostridia;Clostridiales;Ruminococcaceae;Ruminococcaceae UCG-014                                            | 24.40  | 3.96  | Day03-07-Day08-14 |
| OTU_34 Bacteria;Firmicutes;Clostridia;Clostridiales;Ruminococcaceae;Subdoligranulum                                                     | 158.74 | 4.41  | Day03-07-Day08-14 |
| OTU_275 Bacteria;Firmicutes;Clostridia;Clostridiales;Lachnospiraceae;Acetitomaculum                                                     | 6.90   | 3.30  | Day03-07-Day08-14 |
| OTU_12052 Bacteria;Proteobacteria;Gammaproteobacteria;Enterobacteriales;Enterobacteriaceae;Escherichia-Shigella                         | 21.11  | -2.74 | Day03-07-Day08-14 |
| OTU_11502 Bacteria;Proteobacteria;Gammaproteobacteria;Enterobacteriales;Enterobacteriaceae;Escherichia-Shigella;Shigella flexneri K-671 | 7.52   | -2.24 | Day03-07-Day08-14 |
| OTU_123 Bacteria;Actinobacteria;Coriobacteriia;Coriobacteriales;Coriobacteriaceae;Eggerthella                                           | 104.91 | 3.16  | Day03-07-Day08-14 |
| OTU_3738 Bacteria;Proteobacteria;Gammaproteobacteria;Enterobacteriales;Enterobacteriaceae;Escherichia-Shigella                          | 47.68  | -2.83 | Day03-07-Day08-14 |
| OTU_298 Bacteria;Firmicutes;Clostridia;Clostridiales;Ruminococcaceae;Ruminiclostridium 9                                                | 11.11  | 2.82  | Day03-07-Day08-14 |
| OTU_31 Bacteria;Firmicutes;Clostridia;Clostridiales;Ruminococcaceae;Ruminococcaceae UCG-005                                             | 19.39  | 4.19  | Day03-07-Day08-14 |
| OTU_2587 Bacteria;Proteobacteria;Gammaproteobacteria;Enterobacteriales;Enterobacteriaceae;Escherichia-Shigella                          | 64.83  | -2.78 | Day03-07-Day08-14 |
| OTU_109 Bacteria;Firmicutes;Clostridia;Clostridiales;Ruminococcaceae;Ruminococcaceae UCG-014                                            | 35.09  | 4.06  | Day03-07-Day08-14 |
| OTU_13523 Bacteria;Firmicutes;Bacilli;Bacillales;Bacillaceae;Bacillus                                                                   | 71.97  | 4.09  | Day03-07-Day08-14 |
| OTU_86 Bacteria;Firmicutes;Bacilli;Lactobacillales;Streptococcaceae;Streptococcus                                                       | 8.28   | -3.17 | Day03-07-Day08-14 |
| OTU_466 Bacteria;Firmicutes;Clostridia;Clostridiales;Ruminococcaceae;Anaerotruncus                                                      | 4.88   | 2.56  | Day03-07-Day08-14 |
| OTU_5864 Bacteria;Firmicutes;Clostridia;Clostridiales;Ruminococcaceae;Ruminococcaceae UCG-014                                           | 9.47   | 3.61  | Day03-07-Day08-14 |
| OTU_418 Bacteria;Firmicutes;Bacilli;Lactobacillales;Lactobacillaceae;Lactobacillus;Lactobacillus coleohominis                           | 4.54   | 2.79  | Day03-07-Day08-14 |

|                                                                                                                                                           |       |       |                   |
|-----------------------------------------------------------------------------------------------------------------------------------------------------------|-------|-------|-------------------|
| OTU_179<br>Bacteria;Firmicutes;Clostridia;Clostridiales;Ruminococcaceae;Acetanaerobacterium;Acetanaerobacterium<br>elongatum                              | 5.73  | 3.19  | Day03-07-Day08-14 |
| OTU_266 Bacteria;Firmicutes;Clostridia;Clostridiales;Ruminococcaceae;Ruminococcaceae UCG-002                                                              | 8.23  | 3.20  | Day03-07-Day08-14 |
| OTU_11103 Bacteria;Firmicutes;Clostridia;Clostridiales;Lachnospiraceae;Eisenbergiella                                                                     | 7.31  | -2.19 | Day03-07-Day08-14 |
| OTU_374 Bacteria;Firmicutes;Clostridia;Clostridiales;Ruminococcaceae                                                                                      | 8.76  | 3.61  | Day03-07-Day08-14 |
| OTU_12293 Bacteria;Firmicutes;Clostridia;Clostridiales;Ruminococcaceae;Ruminiclostridium 5                                                                | 8.47  | 3.29  | Day03-07-Day08-14 |
| OTU_2701 Bacteria;Firmicutes;Clostridia;Clostridiales;Lachnospiraceae;Eisenbergiella                                                                      | 39.36 | -4.00 | Day03-07-Day08-14 |
| OTU_327 Bacteria;Firmicutes;Clostridia;Clostridiales;Ruminococcaceae                                                                                      | 7.65  | 2.37  | Day03-07-Day08-14 |
| OTU_290 Bacteria;Firmicutes;Clostridia;Clostridiales;Family XIII;[Eubacterium] nodatum group                                                              | 7.78  | 2.67  | Day03-07-Day08-14 |
| OTU_99 Bacteria;Firmicutes;Clostridia;Clostridiales;Clostridiales vadinBB60 group                                                                         | 39.47 | 3.76  | Day03-07-Day08-14 |
| OTU_16 Bacteria;Firmicutes;Clostridia;Clostridiales;Lachnospiraceae;Eisenbergiella                                                                        | 48.58 | 3.80  | Day03-07-Day08-14 |
| OTU_92 Bacteria;Firmicutes;Clostridia;Clostridiales;Clostridiales vadinBB60 group                                                                         | 17.26 | 3.67  | Day03-07-Day08-14 |
| OTU_198 Bacteria;Firmicutes;Clostridia;Clostridiales;Ruminococcaceae;Faecalibacterium                                                                     | 8.28  | 3.38  | Day03-07-Day08-14 |
| OTU_477 NA;NA;NA;NA;NA;NA;NA                                                                                                                              | 3.91  | -2.94 | Day03-07-Day08-14 |
| OTU_507<br>Bacteria;Proteobacteria;Gammaproteobacteria;Enterobacteriales;Enterobacteriaceae;Cronobacter;Enterobacter<br>sp. enrichment culture clone HSL2 | 3.97  | -2.64 | Day03-07-Day08-14 |
| OTU_1369 Bacteria;Firmicutes;Clostridia;Clostridiales;Lachnospiraceae;Eisenbergiella                                                                      | 11.53 | -2.10 | Day03-07-Day08-14 |
| OTU_230 Bacteria;Firmicutes;Clostridia;Clostridiales;Ruminococcaceae;Ruminiclostridium 5                                                                  | 22.45 | 2.78  | Day03-07-Day08-14 |
| OTU_279 Bacteria;Firmicutes;Clostridia;Clostridiales;Ruminococcaceae;Ruminiclostridium 5                                                                  | 7.50  | 2.16  | Day03-07-Day08-14 |

|                                                                                                                   |        |       |                   |
|-------------------------------------------------------------------------------------------------------------------|--------|-------|-------------------|
| OTU_610 Bacteria;Firmicutes;Clostridia;Clostridiales;Ruminococcaceae;Anaerotruncus                                | 4.11   | 2.31  | Day03-07-Day08-14 |
| OTU_382 Bacteria;Firmicutes;Clostridia;Clostridiales;Christensenellaceae;Christensenellaceae R-7 group            | 3.78   | 2.43  | Day03-07-Day08-14 |
| OTU_54 Bacteria;Firmicutes;Clostridia;Clostridiales;Ruminococcaceae;Ruminococcaceae UCG-014                       | 373.84 | 4.15  | Day03-07-Day08-14 |
| OTU_3453 Bacteria;Firmicutes;Clostridia;Clostridiales;Lachnospiraceae;Tyzzerella                                  | 122.69 | 3.52  | Day03-07-Day08-14 |
| OTU_286 Bacteria;Firmicutes;Clostridia;Clostridiales;Ruminococcaceae;[Eubacterium] coprostanoligenes group        | 6.63   | 3.10  | Day03-07-Day08-14 |
| OTU_12120 Bacteria;Firmicutes;Clostridia;Clostridiales;Clostridiales vadinBB60 group                              | 6.75   | 3.08  | Day03-07-Day08-14 |
| OTU_6707 Bacteria;Firmicutes;Clostridia;Clostridiales;Ruminococcaceae                                             | 21.36  | 3.60  | Day03-07-Day08-14 |
| OTU_305 Bacteria;Firmicutes;Clostridia;Clostridiales;Ruminococcaceae;Ruminococcaceae UCG-014                      | 11.30  | 3.12  | Day03-07-Day08-14 |
| OTU_417 No blast hit                                                                                              | 5.16   | 2.84  | Day03-07-Day08-14 |
| OTU_138 Bacteria;Firmicutes;Bacilli;Lactobacillales;Lactobacillaceae;Lactobacillus;Lactobacillus salivarius GJ-24 | 32.04  | 2.92  | Day03-07-Day08-14 |
| OTU_2496 Bacteria;Firmicutes;Clostridia;Clostridiales;Lachnospiraceae;Tyzzerella                                  | 8.43   | 3.02  | Day03-07-Day08-14 |
| OTU_80 Bacteria;Firmicutes;Clostridia;Clostridiales;Lachnospiraceae;Blautia                                       | 251.36 | 3.23  | Day03-07-Day08-14 |
| OTU_119 Bacteria;Firmicutes;Clostridia;Clostridiales;Lachnospiraceae;Blautia                                      | 138.97 | 2.84  | Day03-07-Day08-14 |
| OTU_180 Bacteria;Firmicutes;Clostridia;Clostridiales;Ruminococcaceae;Ruminococcus 1                               | 8.05   | 2.89  | Day03-07-Day08-14 |
| OTU_105 Bacteria;Firmicutes;Clostridia;Clostridiales;Ruminococcaceae;Ruminococcaceae NK4A214 group                | 5.21   | 2.95  | Day03-07-Day08-14 |
| OTU_686 No blast hit                                                                                              | 2.82   | -2.16 | Day03-07-Day08-14 |
| OTU_117 Bacteria;Firmicutes;Clostridia;Clostridiales;Ruminococcaceae                                              | 83.04  | 2.93  | Day03-07-Day08-14 |
| OTU_178 Bacteria;Firmicutes;Clostridia;Clostridiales;Ruminococcaceae;Anaerotruncus                                | 11.14  | 3.04  | Day03-07-Day08-14 |

|                                                                                                    |        |      |                   |
|----------------------------------------------------------------------------------------------------|--------|------|-------------------|
| OTU_217 Bacteria;Firmicutes;Clostridia;Clostridiales;Family XIII;Family XIII UCG-001               | 3.71   | 2.37 | Day03-07-Day08-14 |
| OTU_235 Bacteria;Firmicutes;Clostridia;Clostridiales;Ruminococcaceae;Anaerotruncus                 | 7.07   | 2.80 | Day03-07-Day08-14 |
| OTU_67 Bacteria;Firmicutes;Clostridia;Clostridiales;Ruminococcaceae;Ruminococcaceae NK4A214 group  | 32.67  | 3.20 | Day03-07-Day08-14 |
| OTU_83 Bacteria;Firmicutes;Clostridia;Clostridiales;Ruminococcaceae;Ruminococcus 1                 | 5.08   | 3.00 | Day03-07-Day08-14 |
| OTU_454 No blast hit                                                                               | 7.13   | 2.29 | Day03-07-Day08-14 |
| OTU_285 Bacteria;Firmicutes;Clostridia;Clostridiales;Lachnospiraceae;Roseburia                     | 3.57   | 2.43 | Day03-07-Day08-14 |
| OTU_15571 Bacteria;Firmicutes;Clostridia;Clostridiales;Ruminococcaceae                             | 5.12   | 2.62 | Day03-07-Day08-14 |
| OTU_1047 Bacteria;Firmicutes;Clostridia;Clostridiales;Ruminococcaceae                              | 3.80   | 2.53 | Day03-07-Day08-14 |
| OTU_73 Bacteria;Firmicutes;Bacilli;Bacillales;Bacillaceae;Bacillus                                 | 108.30 | 3.58 | Day03-07-Day08-14 |
| OTU_59 Bacteria;Firmicutes;Clostridia;Clostridiales;Ruminococcaceae;Ruminococcaceae UCG-005        | 394.86 | 3.73 | Day03-07-Day08-14 |
| OTU_3700 Bacteria;Firmicutes;Clostridia;Clostridiales;Defluviitaleaceae;Defluviitaleaceae UCG-011  | 41.17  | 2.79 | Day03-07-Day08-14 |
| OTU_126 Bacteria;Firmicutes;Clostridia;Clostridiales;Ruminococcaceae;Ruminococcaceae NK4A214 group | 10.01  | 2.81 | Day03-07-Day08-14 |
| OTU_132 Bacteria;Firmicutes;Clostridia;Clostridiales;Ruminococcaceae;Ruminiclostridium 5           | 16.50  | 2.80 | Day03-07-Day08-14 |
| OTU_35 Bacteria;Firmicutes;Clostridia;Clostridiales;Clostridiales vadinBB60 group                  | 529.57 | 3.05 | Day03-07-Day08-14 |
| OTU_370 No blast hit                                                                               | 10.54  | 2.16 | Day03-07-Day08-14 |
| OTU_1 Bacteria;Firmicutes;Clostridia;Clostridiales;Ruminococcaceae;Faecalibacterium                | 526.62 | 3.93 | Day03-07-Day08-14 |
| OTU_3296 Bacteria;Firmicutes;Clostridia;Clostridiales;Ruminococcaceae                              | 7.38   | 2.07 | Day03-07-Day08-14 |
| OTU_13602 Bacteria;Firmicutes;Clostridia;Clostridiales;Clostridiales vadinBB60 group               | 4.85   | 2.72 | Day03-07-Day08-14 |

|                                                                                                                  |        |      |                   |
|------------------------------------------------------------------------------------------------------------------|--------|------|-------------------|
| OTU_13 Bacteria;Firmicutes;Clostridia;Clostridiales;Lachnospiraceae;Tyzzerella                                   | 338.74 | 3.23 | Day03-07-Day08-14 |
| OTU_360 Bacteria;Firmicutes;Clostridia;Clostridiales;Ruminococcaceae;Ruminococcus 2                              | 3.97   | 2.31 | Day03-07-Day08-14 |
| OTU_414 No blast hit                                                                                             | 8.64   | 2.14 | Day03-07-Day08-14 |
| OTU_48 Bacteria;Firmicutes;Clostridia;Clostridiales;Defluviitaleaceae;Defluviitaleaceae UCG-011                  | 101.45 | 2.81 | Day03-07-Day08-14 |
| OTU_218 Bacteria;Firmicutes;Clostridia;Clostridiales;Ruminococcaceae;Butyricoccus;Butyricoccus pullicaecorum 1.2 | 6.60   | 2.63 | Day03-07-Day08-14 |
| OTU_242 Bacteria;Firmicutes;Clostridia;Clostridiales;Ruminococcaceae;Anaerotruncus                               | 2.88   | 2.07 | Day03-07-Day08-14 |
| OTU_127 Bacteria;Firmicutes;Clostridia;Clostridiales;Ruminococcaceae;Ruminiclostridium 9                         | 41.18  | 2.37 | Day03-07-Day08-14 |
| OTU_267 Bacteria;Actinobacteria;Coriobacteriia;Coriobacteriales;Coriobacteriaceae                                | 3.16   | 2.23 | Day03-07-Day08-14 |
| OTU_234 Bacteria;Firmicutes;Erysipelotrichia;Erysipelotrichales;Erysipelotrichaceae                              | 10.21  | 2.00 | Day03-07-Day08-14 |
| OTU_319 No blast hit                                                                                             | 9.23   | 2.24 | Day03-07-Day08-14 |
| OTU_3390 Bacteria;Firmicutes;Clostridia;Clostridiales;Ruminococcaceae;[Eubacterium] coprostanoligenes group      | 212.08 | 3.05 | Day03-07-Day08-14 |
| OTU_37 Bacteria;Firmicutes;Clostridia;Clostridiales;Clostridiales vadinBB60 group                                | 3.76   | 2.51 | Day03-07-Day08-14 |
| OTU_64 Bacteria;Firmicutes;Clostridia;Clostridiales;Ruminococcaceae;Ruminiclostridium 5                          | 7.52   | 2.70 | Day03-07-Day08-14 |
| OTU_3027 Bacteria;Firmicutes;Clostridia;Clostridiales;Ruminococcaceae;Intestinimonas                             | 16.05  | 2.80 | Day03-07-Day08-14 |
| OTU_149 Bacteria;Firmicutes;Clostridia;Clostridiales;Lachnospiraceae;Lachnoclostridium                           | 10.91  | 2.39 | Day03-07-Day08-14 |
| OTU_9 Bacteria;Firmicutes;Negativicutes;Selenomonadales;Veillonellaceae;Megamonas                                | 3.26   | 2.28 | Day03-07-Day08-14 |
| OTU_314 Bacteria;Firmicutes;Clostridia;Clostridiales;Ruminococcaceae                                             | 2.92   | 2.06 | Day03-07-Day08-14 |
| OTU_68 Bacteria;Firmicutes;Clostridia;Clostridiales;Ruminococcaceae;Hydrogenoanaerobacterium                     | 3.48   | 2.39 | Day03-07-Day08-14 |

|                                                                                                           |        |      |                   |
|-----------------------------------------------------------------------------------------------------------|--------|------|-------------------|
| OTU_148 Bacteria;Firmicutes;Clostridia;Clostridiales;Clostridiales vadinBB60 group                        | 48.86  | 2.87 | Day03-07-Day08-14 |
| OTU_301 Bacteria;Firmicutes;Clostridia;Clostridiales;Ruminococcaceae;Ruminiclostridium 5                  | 16.18  | 2.15 | Day03-07-Day08-14 |
| OTU_5053 Bacteria;Firmicutes;Clostridia;Clostridiales;Lachnospiraceae                                     | 21.53  | 2.42 | Day03-07-Day08-14 |
| OTU_541 Bacteria;Firmicutes;Clostridia;Clostridiales;Ruminococcaceae;Ruminococcaceae UCG-013              | 21.29  | 2.06 | Day03-07-Day08-14 |
| OTU_6463 Bacteria;Firmicutes;Clostridia;Clostridiales;Ruminococcaceae;Ruminococcaceae NK4A214 group       | 11.11  | 2.29 | Day03-07-Day08-14 |
| OTU_358 Bacteria;Firmicutes;Clostridia;Clostridiales;Ruminococcaceae                                      | 8.39   | 2.09 | Day03-07-Day08-14 |
| OTU_243 Bacteria;Firmicutes;Clostridia;Clostridiales;Clostridiales vadinBB60 group                        | 38.69  | 2.85 | Day03-07-Day08-14 |
| OTU_220 Bacteria;Firmicutes;Clostridia;Clostridiales;Ruminococcaceae;Ruminococcaceae UCG-005              | 34.91  | 2.23 | Day03-07-Day08-14 |
| OTU_778 Bacteria;Firmicutes;Clostridia;Clostridiales;Ruminococcaceae;Ruminococcaceae UCG-014              | 4.12   | 2.18 | Day03-07-Day08-14 |
| OTU_21 Bacteria;Firmicutes;Clostridia;Clostridiales;Ruminococcaceae                                       | 10.68  | 2.49 | Day03-07-Day08-14 |
| OTU_526 Bacteria;Firmicutes;Clostridia;Clostridiales;Lachnospiraceae;Lachnoclostridium                    | 7.88   | 2.17 | Day03-07-Day08-14 |
| OTU_167 Bacteria;Firmicutes;Clostridia;Clostridiales;Lachnospiraceae;Shuttleworthia                       | 30.99  | 2.31 | Day03-07-Day08-14 |
| OTU_185 Bacteria;Firmicutes;Clostridia;Clostridiales;Ruminococcaceae;Ruminiclostridium 5                  | 5.43   | 2.08 | Day03-07-Day08-14 |
| OTU_42 Bacteria;Firmicutes;Clostridia;Clostridiales;Clostridiales vadinBB60 group                         | 5.73   | 2.42 | Day03-07-Day08-14 |
| OTU_36 Bacteria;Firmicutes;Clostridia;Clostridiales;Ruminococcaceae;[Eubacterium] coprostanoligenes group | 378.13 | 2.82 | Day03-07-Day08-14 |
| OTU_101 Bacteria;Firmicutes;Clostridia;Clostridiales;Ruminococcaceae;Anaerotruncus                        | 2.98   | 2.13 | Day03-07-Day08-14 |
| OTU_130 Bacteria;Firmicutes;Clostridia;Clostridiales;Ruminococcaceae;Ruminococcaceae UCG-005              | 9.26   | 2.24 | Day03-07-Day08-14 |
| OTU_14105 Bacteria;Firmicutes;Clostridia;Clostridiales;Ruminococcaceae;Ruminococcaceae UCG-009            | 250.90 | 2.23 | Day03-07-Day08-14 |

|                                                                                                                                   |         |       |                   |
|-----------------------------------------------------------------------------------------------------------------------------------|---------|-------|-------------------|
| OTU_43<br>Bacteria;Actinobacteria;Actinobacteria;Bifidobacteriales;Bifidobacteriaceae;Bifidobacterium;Bifidobacterium saeculare   | 4.58    | 2.15  | Day03-07-Day08-14 |
| OTU_6238<br>Bacteria;Actinobacteria;Actinobacteria;Bifidobacteriales;Bifidobacteriaceae;Bifidobacterium;Bifidobacterium saeculare | 3.20    | 2.00  | Day03-07-Day08-14 |
| OTU_79 Bacteria;Firmicutes;Clostridia;Clostridiales;Clostridiales vadinBB60 group                                                 | 2.87    | 2.07  | Day03-07-Day08-14 |
| OTU_108 Bacteria;Firmicutes;Clostridia;Clostridiales;Ruminococcaceae;Anaerofilum                                                  | 48.59   | 2.53  | Day03-07-Day08-14 |
| OTU_1190 Bacteria;Firmicutes;Clostridia;Clostridiales;Ruminococcaceae;Ruminiclostridium;Clostridiales bacterium DJF_B152          | 4.01    | 2.06  | Day03-07-Day08-14 |
| OTU_88 Bacteria;Firmicutes;Clostridia;Clostridiales;Lachnospiraceae;Lachnospiraceae FE2018 group                                  | 174.59  | 2.33  | Day03-07-Day08-14 |
| OTU_605 Bacteria;Firmicutes;Clostridia;Clostridiales;Ruminococcaceae;Ruminococcaceae UCG-014                                      | 14.53   | 2.06  | Day03-07-Day08-14 |
| OTU_4425 Bacteria;Firmicutes;Clostridia;Clostridiales;Clostridiales vadinBB60 group                                               | 93.57   | 2.53  | Day03-07-Day08-14 |
| OTU_3463 Bacteria;Firmicutes;Clostridia;Clostridiales;Ruminococcaceae                                                             | 7.95    | 2.06  | Day03-07-Day08-14 |
| OTU_380 Bacteria;Firmicutes;Clostridia;Clostridiales;Clostridiales vadinBB60 group                                                | 35.61   | 2.06  | Day03-07-Day08-14 |
| OTU_315 Bacteria;Firmicutes;Clostridia;Clostridiales;Lachnospiraceae                                                              | 38.25   | -2.20 | Day03-07-Day08-14 |
| OTU_53 Bacteria;Firmicutes;Clostridia;Clostridiales;Ruminococcaceae;Ruminiclostridium 5                                           | 75.08   | 2.03  | Day03-07-Day08-14 |
| OTU_1729 Bacteria;Firmicutes;Clostridia;Clostridiales;Clostridiales vadinBB60 group                                               | 539.18  | 2.68  | Day03-07-Day08-14 |
| OTU_14 Bacteria;Firmicutes;Clostridia;Clostridiales;Clostridiales vadinBB60 group                                                 | 1344.43 | 2.73  | Day03-07-Day08-14 |
| OTU_90 Bacteria;Firmicutes;Clostridia;Clostridiales;Lachnospiraceae                                                               | 310.12  | 2.09  | Day03-07-Day08-14 |
| OTU_1024 Bacteria;Firmicutes;Clostridia;Clostridiales;Ruminococcaceae;Faecalibacterium                                            | 637.20  | 2.02  | Day03-07-Day08-14 |
| OTU_86 Bacteria;Firmicutes;Bacilli;Lactobacillales;Streptococcaceae;Streptococcus                                                 | 146.99  | 6.84  | Day08-14-Day15-24 |

|                                                                                                                                |        |      |                   |
|--------------------------------------------------------------------------------------------------------------------------------|--------|------|-------------------|
| OTU_70 Bacteria;Firmicutes;Clostridia;Clostridiales;Clostridiales vadinBB60 group                                              | 131.80 | 7.61 | Day08-14-Day15-24 |
| OTU_82 Bacteria;Firmicutes;Clostridia;Clostridiales;Ruminococcaceae;[Eubacterium] coprostanoligenes group                      | 204.30 | 8.37 | Day08-14-Day15-24 |
| OTU_75 Bacteria;Firmicutes;Clostridia;Clostridiales;Ruminococcaceae;Ruminococcaceae UCG-014                                    | 213.10 | 8.11 | Day08-14-Day15-24 |
| OTU_3674 Bacteria;Firmicutes;Clostridia;Clostridiales;Clostridiales vadinBB60 group                                            | 96.35  | 7.18 | Day08-14-Day15-24 |
| OTU_94 Bacteria;Firmicutes;Clostridia;Clostridiales;Ruminococcaceae;Ruminococcaceae UCG-014                                    | 65.43  | 6.19 | Day08-14-Day15-24 |
| OTU_97 Bacteria;Firmicutes;Clostridia;Clostridiales;Christensenellaceae;Christensenellaceae R-7 group                          | 67.16  | 6.27 | Day08-14-Day15-24 |
| OTU_7 Bacteria;Firmicutes;Clostridia;Clostridiales;Ruminococcaceae                                                             | 132.53 | 7.44 | Day08-14-Day15-24 |
| OTU_199 Bacteria;Firmicutes;Clostridia;Clostridiales;Christensenellaceae;Christensenellaceae R-7 group                         | 41.01  | 5.24 | Day08-14-Day15-24 |
| OTU_102 Bacteria;Firmicutes;Clostridia;Clostridiales;Ruminococcaceae;Ruminiclostridium 9                                       | 74.23  | 6.48 | Day08-14-Day15-24 |
| OTU_207 Bacteria;Firmicutes;Clostridia;Clostridiales;Ruminococcaceae;Ruminococcaceae UCG-014                                   | 41.70  | 5.76 | Day08-14-Day15-24 |
| OTU_116 Bacteria;Firmicutes;Clostridia;Clostridiales;Clostridiales vadinBB60 group                                             | 140.11 | 5.88 | Day08-14-Day15-24 |
| OTU_137 Bacteria;Firmicutes;Clostridia;Clostridiales;Clostridiales vadinBB60 group                                             | 47.10  | 6.14 | Day08-14-Day15-24 |
| OTU_6238 Bacteria;Actinobacteria;Actinobacteria;Bifidobacteriales;Bifidobacteriaceae;Bifidobacterium;Bifidobacterium saeculare | 160.11 | 5.64 | Day08-14-Day15-24 |
| OTU_101 Bacteria;Firmicutes;Clostridia;Clostridiales;Ruminococcaceae;Anaerotruncus                                             | 159.98 | 5.74 | Day08-14-Day15-24 |
| OTU_114 Bacteria;Tenericutes;Mollicutes;Mollicutes RF9                                                                         | 53.67  | 6.44 | Day08-14-Day15-24 |
| OTU_63 Bacteria;Firmicutes;Clostridia;Clostridiales;Ruminococcaceae;Ruminococcaceae UCG-014                                    | 115.45 | 5.83 | Day08-14-Day15-24 |
| OTU_142 Bacteria;Firmicutes;Clostridia;Clostridiales;Ruminococcaceae;Ruminococcaceae UCG-010                                   | 42.68  | 5.53 | Day08-14-Day15-24 |



|                                                                                                                              |        |      |                   |
|------------------------------------------------------------------------------------------------------------------------------|--------|------|-------------------|
| OTU_214 Bacteria;Firmicutes;Clostridia;Clostridiales;Lachnospiraceae                                                         | 116.69 | 6.62 | Day08-14-Day15-24 |
| OTU_140 Bacteria;Firmicutes;Clostridia;Clostridiales;Ruminococcaceae;Ruminococcaceae UCG-004                                 | 20.32  | 4.52 | Day08-14-Day15-24 |
| OTU_1938 Bacteria;Firmicutes;Clostridia;Clostridiales;Ruminococcaceae                                                        | 78.43  | 6.48 | Day08-14-Day15-24 |
| OTU_154 Bacteria;Firmicutes;Clostridia;Clostridiales;Ruminococcaceae;Ruminiclostridium 5                                     | 95.76  | 5.25 | Day08-14-Day15-24 |
| OTU_43 Bacteria;Actinobacteria;Actinobacteria;Bifidobacteriales;Bifidobacteriaceae;Bifidobacterium;Bifidobacterium saeculare | 410.24 | 5.72 | Day08-14-Day15-24 |
| OTU_111 Bacteria;Firmicutes;Clostridia;Clostridiales;Ruminococcaceae;Ruminococcaceae UCG-014                                 | 37.58  | 5.92 | Day08-14-Day15-24 |
| OTU_6396 Bacteria;Firmicutes;Clostridia;Clostridiales;Clostridiales vadinBB60 group                                          | 64.58  | 5.88 | Day08-14-Day15-24 |
| OTU_55 Bacteria;Firmicutes;Clostridia;Clostridiales;Ruminococcaceae;Ruminococcaceae UCG-014                                  | 438.98 | 6.96 | Day08-14-Day15-24 |
| OTU_173 Bacteria;Firmicutes;Clostridia;Clostridiales;Ruminococcaceae;Anaerotruncus                                           | 47.69  | 4.95 | Day08-14-Day15-24 |
| OTU_151 Bacteria;Firmicutes;Clostridia;Clostridiales;Ruminococcaceae;Anaerotruncus                                           | 32.42  | 5.66 | Day08-14-Day15-24 |
| OTU_84 Bacteria;Firmicutes;Clostridia;Clostridiales;Lachnospiraceae                                                          | 142.18 | 5.44 | Day08-14-Day15-24 |
| OTU_156 Bacteria;Firmicutes;Clostridia;Clostridiales;Ruminococcaceae;Oscillospira                                            | 31.57  | 5.18 | Day08-14-Day15-24 |
| OTU_66 Bacteria;Firmicutes;Clostridia;Clostridiales;Ruminococcaceae                                                          | 43.21  | 5.76 | Day08-14-Day15-24 |
| OTU_6262 Bacteria;Firmicutes;Clostridia;Clostridiales;Ruminococcaceae;Ruminococcaceae UCG-014                                | 268.68 | 5.27 | Day08-14-Day15-24 |
| OTU_87 Bacteria;Firmicutes;Clostridia;Clostridiales;Ruminococcaceae;Ruminococcaceae UCG-014                                  | 128.64 | 5.16 | Day08-14-Day15-24 |
| OTU_118 Bacteria;Firmicutes;Clostridia;Clostridiales;Clostridiales vadinBB60 group                                           | 54.77  | 5.99 | Day08-14-Day15-24 |
| OTU_7674 Bacteria;Tenericutes;Mollicutes;Mollicutes RF9                                                                      | 26.95  | 5.43 | Day08-14-Day15-24 |

|                                                                                                                        |        |      |                   |
|------------------------------------------------------------------------------------------------------------------------|--------|------|-------------------|
| OTU_191 Bacteria;Firmicutes;Clostridia;Clostridiales;Ruminococcaceae;Ruminococcaceae UCG-014                           | 25.65  | 4.22 | Day08-14-Day15-24 |
| OTU_228 Bacteria;Firmicutes;Clostridia;Clostridiales;Ruminococcaceae;Ruminococcaceae UCG-014                           | 20.31  | 5.02 | Day08-14-Day15-24 |
| OTU_233 Bacteria;Firmicutes;Clostridia;Clostridiales;Ruminococcaceae;Ruminiclostridium 1                               | 16.34  | 4.43 | Day08-14-Day15-24 |
| OTU_15527 Bacteria;Firmicutes;Clostridia;Clostridiales;Ruminococcaceae;Ruminococcaceae UCG-014                         | 20.71  | 5.04 | Day08-14-Day15-24 |
| OTU_124 Bacteria;Firmicutes;Clostridia;Clostridiales;Clostridiales vadinBB60 group                                     | 79.40  | 4.90 | Day08-14-Day15-24 |
| OTU_105 Bacteria;Firmicutes;Clostridia;Clostridiales;Ruminococcaceae;Ruminococcaceae NK4A214 group                     | 101.24 | 4.19 | Day08-14-Day15-24 |
| OTU_159 Bacteria;Firmicutes;Clostridia;Clostridiales;Ruminococcaceae;Intestinimonas                                    | 100.19 | 4.93 | Day08-14-Day15-24 |
| OTU_5826 Bacteria;Firmicutes;Clostridia;Clostridiales;Ruminococcaceae                                                  | 22.74  | 5.04 | Day08-14-Day15-24 |
| OTU_8131 Bacteria;Firmicutes;Clostridia;Clostridiales;Ruminococcaceae;Anaerotruncus                                    | 58.18  | 4.54 | Day08-14-Day15-24 |
| OTU_213 Bacteria;Firmicutes;Clostridia;Clostridiales;Clostridiales vadinBB60 group                                     | 19.70  | 4.97 | Day08-14-Day15-24 |
| OTU_6791 Bacteria;Firmicutes;Clostridia;Clostridiales;Ruminococcaceae;Ruminococcaceae UCG-004                          | 8.57   | 3.54 | Day08-14-Day15-24 |
| OTU_169 Bacteria;Firmicutes;Clostridia;Clostridiales;Lachnospiraceae                                                   | 22.49  | 5.08 | Day08-14-Day15-24 |
| OTU_179 Bacteria;Firmicutes;Clostridia;Clostridiales;Ruminococcaceae;Acetanaerobacterium;Acetanaerobacterium elongatum | 52.84  | 3.14 | Day08-14-Day15-24 |
| OTU_254 Bacteria;Firmicutes;Clostridia;Clostridiales;Christensenellaceae;Christensenellaceae R-7 group                 | 19.07  | 3.45 | Day08-14-Day15-24 |
| OTU_438 Bacteria;Firmicutes;Clostridia;Clostridiales;Ruminococcaceae;Ruminiclostridium                                 | 27.85  | 4.88 | Day08-14-Day15-24 |
| OTU_184 Bacteria;Firmicutes;Clostridia;Clostridiales;Ruminococcaceae;Ruminococcaceae UCG-014                           | 16.28  | 4.20 | Day08-14-Day15-24 |
| OTU_263 Bacteria;Firmicutes;Clostridia;Clostridiales;Ruminococcaceae;Anaerotruncus                                     | 14.70  | 4.52 | Day08-14-Day15-24 |

|                                                                                                    |        |      |                   |
|----------------------------------------------------------------------------------------------------|--------|------|-------------------|
| OTU_249 Bacteria;Firmicutes;Clostridia;Clostridiales;Ruminococcaceae;Anaerofilum                   | 9.72   | 3.88 | Day08-14-Day15-24 |
| OTU_7826 Bacteria;Firmicutes;Clostridia;Clostridiales;Ruminococcaceae;Ruminococcaceae UCG-014      | 90.77  | 4.58 | Day08-14-Day15-24 |
| OTU_130 Bacteria;Firmicutes;Clostridia;Clostridiales;Ruminococcaceae;Ruminococcaceae UCG-005       | 96.14  | 3.42 | Day08-14-Day15-24 |
| OTU_14407 Bacteria;Firmicutes;Negativicutes;Selenomonadales;Veillonellaceae;Megamonas;unidentified | 132.33 | 5.81 | Day08-14-Day15-24 |
| OTU_162 Bacteria;Firmicutes;Clostridia;Clostridiales;Clostridiales vadinBB60 group                 | 22.40  | 5.05 | Day08-14-Day15-24 |
| OTU_369 Bacteria;Tenericutes;Mollicutes;Mollicutes RF9                                             | 10.35  | 3.69 | Day08-14-Day15-24 |
| OTU_201 Bacteria;Firmicutes;Clostridia;Clostridiales;Clostridiales vadinBB60 group                 | 14.31  | 4.48 | Day08-14-Day15-24 |
| OTU_74 Bacteria;Firmicutes;Clostridia;Clostridiales;Ruminococcaceae;Ruminococcaceae UCG-014        | 106.89 | 3.98 | Day08-14-Day15-24 |
| OTU_602 Bacteria;Firmicutes;Clostridia;Clostridiales;Ruminococcaceae;Ruminococcaceae UCG-014       | 35.39  | 4.55 | Day08-14-Day15-24 |
| OTU_13399 Bacteria;Firmicutes;Clostridia;Clostridiales;Ruminococcaceae;Ruminococcaceae UCG-002     | 18.11  | 3.79 | Day08-14-Day15-24 |
| OTU_292 Bacteria;Firmicutes;Clostridia;Clostridiales;Peptococcaceae                                | 10.58  | 3.41 | Day08-14-Day15-24 |
| OTU_229 Bacteria;Firmicutes;Clostridia;Clostridiales;Clostridiales vadinBB60 group                 | 13.21  | 4.38 | Day08-14-Day15-24 |
| OTU_283 Bacteria;Firmicutes;Clostridia;Clostridiales;Clostridiales vadinBB60 group                 | 9.75   | 3.86 | Day08-14-Day15-24 |
| OTU_100 Bacteria;Firmicutes;Clostridia;Clostridiales;Clostridiales vadinBB60 group                 | 76.00  | 4.46 | Day08-14-Day15-24 |
| OTU_9 Bacteria;Firmicutes;Negativicutes;Selenomonadales;Veillonellaceae;Megamonas                  | 142.36 | 5.55 | Day08-14-Day15-24 |
| OTU_37 Bacteria;Firmicutes;Clostridia;Clostridiales;Clostridiales vadinBB60 group                  | 124.49 | 5.12 | Day08-14-Day15-24 |
| OTU_312 Bacteria;Firmicutes;Clostridia;Clostridiales;Lachnospiraceae                               | 11.39  | 4.16 | Day08-14-Day15-24 |
| OTU_15345 Bacteria;Firmicutes;Clostridia;Clostridiales;Clostridiales vadinBB60 group               | 10.57  | 4.05 | Day08-14-Day15-24 |

|                                                                                                    |        |       |                   |
|----------------------------------------------------------------------------------------------------|--------|-------|-------------------|
| OTU_250 Bacteria;Firmicutes;Clostridia;Clostridiales;Ruminococcaceae                               | 8.07   | 3.47  | Day08-14-Day15-24 |
| OTU_399 Bacteria;Firmicutes;Clostridia;Clostridiales;Clostridiales vadinBB60 group                 | 12.76  | 3.95  | Day08-14-Day15-24 |
| OTU_552 Bacteria;Firmicutes;Clostridia;Clostridiales;Ruminococcaceae                               | 21.66  | 3.88  | Day08-14-Day15-24 |
| OTU_209 Bacteria;Firmicutes;Clostridia;Clostridiales;Clostridiales vadinBB60 group                 | 13.63  | 3.77  | Day08-14-Day15-24 |
| OTU_630 Bacteria;Firmicutes;Clostridia;Clostridiales;Ruminococcaceae;Intestinimonas                | 12.89  | 3.64  | Day08-14-Day15-24 |
| OTU_242 Bacteria;Firmicutes;Clostridia;Clostridiales;Ruminococcaceae;Anaerotruncus                 | 24.98  | 3.17  | Day08-14-Day15-24 |
| OTU_6645 Bacteria;Firmicutes;Clostridia;Clostridiales;Clostridiales vadinBB60 group                | 11.08  | 4.12  | Day08-14-Day15-24 |
| OTU_241 Bacteria;Firmicutes;Clostridia;Clostridiales;Ruminococcaceae;Ruminococcaceae V9D2013 group | 12.69  | 3.40  | Day08-14-Day15-24 |
| OTU_368 Bacteria;Firmicutes;Clostridia;Clostridiales;Clostridiaceae 1;Candidatus Arthromitus       | 9.66   | -2.54 | Day08-14-Day15-24 |
| OTU_135 Bacteria;Firmicutes;Clostridia;Clostridiales;Ruminococcaceae;Ruminococcaceae NK4A214 group | 9.60   | 3.86  | Day08-14-Day15-24 |
| OTU_208 Bacteria;Firmicutes;Clostridia;Clostridiales;Ruminococcaceae;Ruminococcaceae UCG-014       | 18.06  | 3.22  | Day08-14-Day15-24 |
| OTU_389 Bacteria;Tenericutes;Mollicutes;Mollicutes RF9                                             | 8.64   | 2.93  | Day08-14-Day15-24 |
| OTU_240 Bacteria;Firmicutes;Clostridia;Clostridiales;Ruminococcaceae;Ruminococcaceae UCG-014       | 15.05  | 3.26  | Day08-14-Day15-24 |
| OTU_329 Bacteria;Tenericutes;Mollicutes;Mollicutes RF9                                             | 6.40   | 3.11  | Day08-14-Day15-24 |
| OTU_373 Bacteria;Firmicutes;Clostridia;Clostridiales;Ruminococcaceae;Ruminococcaceae UCG-010       | 6.91   | 3.11  | Day08-14-Day15-24 |
| OTU_328 Bacteria;Firmicutes;Clostridia;Clostridiales;Lachnospiraceae;Blautia                       | 20.30  | -2.76 | Day08-14-Day15-24 |
| OTU_149 Bacteria;Firmicutes;Clostridia;Clostridiales;Lachnospiraceae;Lachnoclostridium             | 137.68 | 3.67  | Day08-14-Day15-24 |
| OTU_346 Bacteria;Firmicutes;Clostridia;Clostridiales;Lachnospiraceae;Lachnospiraceae UCG-010       | 6.55   | 2.35  | Day08-14-Day15-24 |

|                                                                                                                                  |        |       |                   |
|----------------------------------------------------------------------------------------------------------------------------------|--------|-------|-------------------|
| OTU_126 Bacteria;Firmicutes;Clostridia;Clostridiales;Ruminococcaceae;Ruminococcaceae NK4A214 group                               | 81.97  | 2.99  | Day08-14-Day15-24 |
| OTU_359 Bacteria;Firmicutes;Clostridia;Clostridiales;Lachnospiraceae;Marvinbryantia                                              | 7.61   | 3.01  | Day08-14-Day15-24 |
| OTU_113 Bacteria;Firmicutes;Clostridia;Clostridiales;Ruminococcaceae;Flavonifractor                                              | 8.98   | -3.23 | Day08-14-Day15-24 |
| OTU_237 Bacteria;Firmicutes;Clostridia;Clostridiales;Ruminococcaceae;Anaerotruncus                                               | 17.34  | 2.81  | Day08-14-Day15-24 |
| OTU_225 Bacteria;Firmicutes;Clostridia;Clostridiales;Clostridiales vadinBB60 group                                               | 43.80  | 3.44  | Day08-14-Day15-24 |
| OTU_152 Bacteria;Firmicutes;Clostridia;Clostridiales;Ruminococcaceae;Ruminococcaceae UCG-014                                     | 65.87  | 3.73  | Day08-14-Day15-24 |
| OTU_83 Bacteria;Firmicutes;Clostridia;Clostridiales;Ruminococcaceae;Ruminococcus 1                                               | 198.87 | 3.72  | Day08-14-Day15-24 |
| OTU_287 Bacteria;Firmicutes;Clostridia;Clostridiales;Ruminococcaceae;Ruminococcaceae UCG-014                                     | 9.93   | 3.36  | Day08-14-Day15-24 |
| OTU_197 Bacteria;Firmicutes;Erysipelotrichia;Erysipelotrichales;Erysipelotrichaceae;Erysipelatoclostridium;bacterium ic1391      | 63.37  | 2.83  | Day08-14-Day15-24 |
| OTU_622 Bacteria;Actinobacteria;Actinobacteria;Corynebacteriales;Corynebacteriaceae;Corynebacterium 1;Corynebacterium glutamicum | 3.64   | -2.20 | Day08-14-Day15-24 |
| OTU_371 Bacteria;Firmicutes;Clostridia;Clostridiales;Lachnospiraceae;Lachnospiraceae NK4A136 group                               | 5.52   | 2.36  | Day08-14-Day15-24 |
| OTU_76 Bacteria;Firmicutes;Clostridia;Clostridiales;Ruminococcaceae;Ruminococcaceae UCG-014                                      | 7.77   | 3.58  | Day08-14-Day15-24 |
| OTU_386 Bacteria;Firmicutes;Clostridia;Clostridiales;Caldicoprobacteraceae;Caldicoprobacter                                      | 5.64   | 3.09  | Day08-14-Day15-24 |
| OTU_193 Bacteria;Firmicutes;Clostridia;Clostridiales;Clostridiales vadinBB60 group                                               | 7.05   | 3.39  | Day08-14-Day15-24 |
| OTU_16519 Bacteria;Firmicutes;Clostridia;Clostridiales;Ruminococcaceae                                                           | 3.22   | -2.17 | Day08-14-Day15-24 |
| OTU_153 Bacteria;Firmicutes;Clostridia;Clostridiales;Lachnospiraceae;[Eubacterium] oxidoreducens group                           | 9.27   | 3.58  | Day08-14-Day15-24 |
| OTU_222 Bacteria;Firmicutes;Clostridia;Clostridiales;Ruminococcaceae                                                             | 11.37  | 2.94  | Day08-14-Day15-24 |

|                                                                                                                                |        |       |                   |
|--------------------------------------------------------------------------------------------------------------------------------|--------|-------|-------------------|
| OTU_284 Bacteria;Firmicutes;Clostridia;Clostridiales;Ruminococcaceae;Anaerotruncus                                             | 10.44  | 2.70  | Day08-14-Day15-24 |
| OTU_270 Bacteria;Firmicutes;Clostridia;Clostridiales;Ruminococcaceae;Anaerotruncus                                             | 5.73   | 2.82  | Day08-14-Day15-24 |
| OTU_12120 Bacteria;Firmicutes;Clostridia;Clostridiales;Clostridiales vadinBB60 group                                           | 54.10  | 2.92  | Day08-14-Day15-24 |
| OTU_6463 Bacteria;Firmicutes;Clostridia;Clostridiales;Ruminococcaceae;Ruminococcaceae NK4A214 group                            | 66.64  | 2.56  | Day08-14-Day15-24 |
| OTU_180 Bacteria;Firmicutes;Clostridia;Clostridiales;Ruminococcaceae;Ruminococcus 1                                            | 57.87  | 2.77  | Day08-14-Day15-24 |
| OTU_2511 Bacteria;Actinobacteria;Actinobacteria;Bifidobacteriales;Bifidobacteriaceae;Bifidobacterium;Bifidobacterium saeculare | 6.48   | 2.90  | Day08-14-Day15-24 |
| OTU_2496 Bacteria;Firmicutes;Clostridia;Clostridiales;Lachnospiraceae;Tyzzerella                                               | 53.00  | 2.55  | Day08-14-Day15-24 |
| OTU_295 No blast hit                                                                                                           | 9.62   | -2.60 | Day08-14-Day15-24 |
| OTU_388 Bacteria;Firmicutes;Clostridia;Clostridiales;Peptococcaceae                                                            | 4.74   | 2.82  | Day08-14-Day15-24 |
| OTU_204 Bacteria;Firmicutes;Clostridia;Clostridiales;Lachnospiraceae;Tyzzerella 3;[Clostridium] colinum                        | 9.45   | 3.33  | Day08-14-Day15-24 |
| OTU_510 Bacteria;Firmicutes;Clostridia;Clostridiales;Ruminococcaceae;Ruminococcaceae NK4A214 group                             | 12.38  | 2.87  | Day08-14-Day15-24 |
| OTU_364 Bacteria;Firmicutes;Clostridia;Clostridiales;Ruminococcaceae;Candidatus Soleaferrea                                    | 8.15   | 2.80  | Day08-14-Day15-24 |
| OTU_309 Bacteria;Firmicutes;Clostridia;Clostridiales;Peptococcaceae                                                            | 6.77   | 2.57  | Day08-14-Day15-24 |
| OTU_343 Bacteria;Firmicutes;Clostridia;Clostridiales;Ruminococcaceae;Ruminiclostridium 9                                       | 90.41  | 2.58  | Day08-14-Day15-24 |
| OTU_16 Bacteria;Firmicutes;Clostridia;Clostridiales;Lachnospiraceae;Eisenbergiella                                             | 683.60 | 3.70  | Day08-14-Day15-24 |
| OTU_500 Bacteria;Firmicutes;Clostridia;Clostridiales;Ruminococcaceae;Ruminococcaceae UCG-010                                   | 4.57   | 2.71  | Day08-14-Day15-24 |
| OTU_79 Bacteria;Firmicutes;Clostridia;Clostridiales;Clostridiales vadinBB60 group                                              | 180.56 | 4.01  | Day08-14-Day15-24 |

|                                                                                                             |        |       |                   |
|-------------------------------------------------------------------------------------------------------------|--------|-------|-------------------|
| OTU_880 Bacteria;Firmicutes;Clostridia;Clostridiales;Ruminococcaceae                                        | 7.07   | 2.97  | Day08-14-Day15-24 |
| OTU_174 Bacteria;Firmicutes;Erysipelotrichia;Erysipelotrichales;Erysipelotrichaceae;Erysipelatoclostridium  | 46.11  | 2.87  | Day08-14-Day15-24 |
| OTU_6638 Bacteria;Firmicutes;Clostridia;Clostridiales;Ruminococcaceae;[Eubacterium] coprostanoligenes group | 5.68   | 2.93  | Day08-14-Day15-24 |
| OTU_264 Bacteria;Firmicutes;Clostridia;Clostridiales;Ruminococcaceae;Ruminiclostridium 5                    | 8.25   | 2.88  | Day08-14-Day15-24 |
| OTU_2701 Bacteria;Firmicutes;Clostridia;Clostridiales;Lachnospiraceae;Eisenbergiella                        | 45.88  | 3.77  | Day08-14-Day15-24 |
| OTU_746 Bacteria;Firmicutes;Clostridia;Clostridiales;Lachnospiraceae;Lachnospiraceae UCG-010                | 6.32   | 2.88  | Day08-14-Day15-24 |
| OTU_202 Bacteria;Firmicutes;Clostridia;Clostridiales;Ruminococcaceae;Ruminiclostridium 9                    | 35.96  | 2.28  | Day08-14-Day15-24 |
| OTU_646 Bacteria;Firmicutes;Clostridia;Clostridiales;Ruminococcaceae;Ruminococcaceae UCG-014                | 8.52   | 2.51  | Day08-14-Day15-24 |
| OTU_767 Bacteria;Firmicutes;Clostridia;Clostridiales;Ruminococcaceae;Ruminococcaceae UCG-014                | 9.86   | 2.54  | Day08-14-Day15-24 |
| OTU_172 Bacteria;Firmicutes;Clostridia;Clostridiales;Ruminococcaceae;Ruminiclostridium 5                    | 222.20 | 2.98  | Day08-14-Day15-24 |
| OTU_424 Bacteria;Firmicutes;Clostridia;Clostridiales;Ruminococcaceae;Anaerotruncus                          | 12.02  | 2.38  | Day08-14-Day15-24 |
| OTU_92 Bacteria;Firmicutes;Clostridia;Clostridiales;Clostridiales vadinBB60 group                           | 137.86 | 2.88  | Day08-14-Day15-24 |
| OTU_564 Bacteria;Firmicutes;Clostridia;Clostridiales;Ruminococcaceae;Ruminococcaceae UCG-014                | 4.01   | 2.39  | Day08-14-Day15-24 |
| OTU_185 Bacteria;Firmicutes;Clostridia;Clostridiales;Ruminococcaceae;Ruminiclostridium 5                    | 33.33  | 2.63  | Day08-14-Day15-24 |
| OTU_1277 Bacteria;Firmicutes;Clostridia;Clostridiales;Lachnospiraceae;Lachnoclostridium                     | 7.89   | -2.46 | Day08-14-Day15-24 |
| OTU_12336 Bacteria;Firmicutes;Clostridia;Clostridiales;Lachnospiraceae                                      | 4.75   | 2.39  | Day08-14-Day15-24 |
| OTU_3027 Bacteria;Firmicutes;Clostridia;Clostridiales;Ruminococcaceae;Intestinimonas                        | 479.66 | 3.46  | Day08-14-Day15-24 |
| OTU_219 Bacteria;Firmicutes;Clostridia;Clostridiales;Lachnospiraceae                                        | 15.89  | 3.21  | Day08-14-Day15-24 |

|                                                                                                                                 |         |      |                   |
|---------------------------------------------------------------------------------------------------------------------------------|---------|------|-------------------|
| OTU_67 Bacteria;Firmicutes;Clostridia;Clostridiales;Ruminococcaceae;Ruminococcaceae NK4A214 group                               | 209.10  | 2.56 | Day08-14-Day15-24 |
| OTU_5864 Bacteria;Firmicutes;Clostridia;Clostridiales;Ruminococcaceae;Ruminococcaceae UCG-014                                   | 189.15  | 3.27 | Day08-14-Day15-24 |
| OTU_217 Bacteria;Firmicutes;Clostridia;Clostridiales;Family XIII;Family XIII UCG-001                                            | 17.87   | 2.19 | Day08-14-Day15-24 |
| OTU_9820 Bacteria;Firmicutes;Clostridia;Clostridiales;Ruminococcaceae;Ruminiclostridium                                         | 57.03   | 3.14 | Day08-14-Day15-24 |
| OTU_421 Bacteria;Firmicutes;Clostridia;Clostridiales;Clostridiales vadinBB60 group                                              | 7.36    | 2.58 | Day08-14-Day15-24 |
| OTU_305 Bacteria;Firmicutes;Clostridia;Clostridiales;Ruminococcaceae;Ruminococcaceae UCG-014                                    | 72.72   | 2.58 | Day08-14-Day15-24 |
| OTU_17 Bacteria;Firmicutes;Clostridia;Clostridiales;Clostridiales vadinBB60 group                                               | 165.76  | 3.90 | Day08-14-Day15-24 |
| OTU_194 Bacteria;Firmicutes;Clostridia;Clostridiales;Ruminococcaceae;Ruminococcaceae UCG-014                                    | 20.71   | 3.12 | Day08-14-Day15-24 |
| OTU_255 Bacteria;Firmicutes;Clostridia;Clostridiales;Ruminococcaceae;Ruminiclostridium 5                                        | 9.58    | 2.65 | Day08-14-Day15-24 |
| OTU_13320 Bacteria;Actinobacteria;Actinobacteria;Bifidobacteriales;Bifidobacteriaceae;Bifidobacterium;Bifidobacterium saeculare | 4.16    | 2.39 | Day08-14-Day15-24 |
| OTU_763 Bacteria;Firmicutes;Clostridia;Clostridiales;Ruminococcaceae;Ruminococcaceae UCG-005                                    | 10.16   | 2.37 | Day08-14-Day15-24 |
| OTU_146 Bacteria;Firmicutes;Clostridia;Clostridiales;Ruminococcaceae                                                            | 4.25    | 2.65 | Day08-14-Day15-24 |
| OTU_31 Bacteria;Firmicutes;Clostridia;Clostridiales;Ruminococcaceae;Ruminococcaceae UCG-005                                     | 1100.28 | 4.04 | Day08-14-Day15-24 |
| OTU_378 Bacteria;Firmicutes;Clostridia;Clostridiales;Ruminococcaceae;Ruminococcaceae UCG-014                                    | 4.19    | 2.51 | Day08-14-Day15-24 |
| OTU_7809 Bacteria;Firmicutes;Clostridia;Clostridiales;Lachnospiraceae;[Eubacterium] oxidoreducens group                         | 6.94    | 2.84 | Day08-14-Day15-24 |
| OTU_316 Bacteria;Firmicutes;Clostridia;Clostridiales;Ruminococcaceae;Ruminococcaceae UCG-013                                    | 4.43    | 2.64 | Day08-14-Day15-24 |
| OTU_15166 Bacteria;Firmicutes;Clostridia;Clostridiales;Ruminococcaceae;Intestinimonas                                           | 5.87    | 2.41 | Day08-14-Day15-24 |



|                                                                                                            |        |       |                   |
|------------------------------------------------------------------------------------------------------------|--------|-------|-------------------|
| OTU_317 Bacteria;Firmicutes;Clostridia;Clostridiales;Ruminococcaceae                                       | 4.68   | 2.58  | Day08-14-Day15-24 |
| OTU_273 Bacteria;Tenericutes;Mollicutes;Mollicutes RF9                                                     | 30.80  | 2.69  | Day08-14-Day15-24 |
| OTU_750 Bacteria;Firmicutes;Clostridia;Clostridiales;Ruminococcaceae;Ruminococcaceae NK4A214 group         | 8.33   | 2.45  | Day08-14-Day15-24 |
| OTU_6846 Bacteria;Firmicutes;Clostridia;Clostridiales;Ruminococcaceae;Ruminococcaceae UCG-014              | 7.33   | 2.43  | Day08-14-Day15-24 |
| OTU_356 Bacteria;Firmicutes;Erysipelotrichia;Erysipelotrichales;Erysipelotrichaceae;Faecalitalea           | 6.25   | 2.43  | Day08-14-Day15-24 |
| OTU_479 No blast hit                                                                                       | 3.23   | -2.01 | Day08-14-Day15-24 |
| OTU_182 Bacteria;Firmicutes;Clostridia;Clostridiales;Ruminococcaceae;[Eubacterium] coprostanoligenes group | 20.17  | 2.98  | Day08-14-Day15-24 |
| OTU_836 Bacteria;Firmicutes;Clostridia;Clostridiales;Ruminococcaceae;Ruminococcaceae UCG-014               | 5.15   | 2.14  | Day08-14-Day15-24 |
| OTU_107 Bacteria;Firmicutes;Clostridia;Clostridiales;Ruminococcaceae;Ruminiclostridium                     | 148.00 | 3.17  | Day08-14-Day15-24 |
| OTU_577 Bacteria;Firmicutes;Clostridia;Clostridiales;Ruminococcaceae                                       | 3.81   | 2.38  | Day08-14-Day15-24 |
| OTU_166 Bacteria;Firmicutes;Erysipelotrichia;Erysipelotrichales;Erysipelotrichaceae;Erysipelatoclostridium | 65.59  | 2.06  | Day08-14-Day15-24 |
| OTU_6332 Bacteria;Firmicutes;Clostridia;Clostridiales;Ruminococcaceae;Flavonifractor                       | 3.83   | -2.15 | Day08-14-Day15-24 |
| OTU_161 Bacteria;Firmicutes;Clostridia;Clostridiales;Family XII;Fusibacter                                 | 3.99   | 2.55  | Day08-14-Day15-24 |
| OTU_177 Bacteria;Firmicutes;Clostridia;Clostridiales;Ruminococcaceae;Ruminococcaceae UCG-009               | 24.17  | 2.97  | Day08-14-Day15-24 |
| OTU_165 Bacteria;Firmicutes;Clostridia;Clostridiales;Ruminococcaceae;Ruminococcaceae UCG-014               | 4.10   | 2.56  | Day08-14-Day15-24 |
| OTU_315 Bacteria;Firmicutes;Clostridia;Clostridiales;Lachnospiraceae                                       | 7.89   | -2.18 | Day08-14-Day15-24 |
| OTU_210 Bacteria;Firmicutes;Clostridia;Clostridiales;Lachnospiraceae                                       | 23.28  | 2.21  | Day08-14-Day15-24 |
| OTU_497 Bacteria;Tenericutes;Mollicutes;Mollicutes RF9                                                     | 4.96   | 2.09  | Day08-14-Day15-24 |

|                                                                                                        |        |      |                   |
|--------------------------------------------------------------------------------------------------------|--------|------|-------------------|
| OTU_106 Bacteria;Firmicutes;Clostridia;Clostridiales;Ruminococcaceae;Ruminiclostridium 5               | 104.58 | 2.08 | Day08-14-Day15-24 |
| OTU_423 Bacteria;Firmicutes;Clostridia;Clostridiales;Lachnospiraceae;Lachnospiraceae UCG-008           | 7.32   | 2.08 | Day08-14-Day15-24 |
| OTU_13602 Bacteria;Firmicutes;Clostridia;Clostridiales;Clostridiales vadinBB60 group                   | 41.62  | 3.06 | Day08-14-Day15-24 |
| OTU_6277 Bacteria;Firmicutes;Clostridia;Clostridiales;Lachnospiraceae;Pseudobutyrvibrio                | 87.04  | 2.87 | Day08-14-Day15-24 |
| OTU_62 Bacteria;Firmicutes;Clostridia;Clostridiales;Lachnospiraceae;Pseudobutyrvibrio                  | 131.08 | 2.89 | Day08-14-Day15-24 |
| OTU_1549 Bacteria;Firmicutes;Clostridia;Clostridiales;Ruminococcaceae;Ruminococcaceae UCG-014          | 3.94   | 2.10 | Day08-14-Day15-24 |
| OTU_192 Bacteria;Firmicutes;Clostridia;Clostridiales;Clostridiales vadinBB60 group                     | 3.99   | 2.55 | Day08-14-Day15-24 |
| OTU_508 Bacteria;Firmicutes;Clostridia;Clostridiales;Ruminococcaceae;Ruminococcaceae UCG-014           | 49.63  | 2.70 | Day08-14-Day15-24 |
| OTU_203 Bacteria;Firmicutes;Clostridia;Clostridiales;Ruminococcaceae;Ruminococcaceae UCG-002           | 11.94  | 2.47 | Day08-14-Day15-24 |
| OTU_353 Bacteria;Firmicutes;Clostridia;Clostridiales;Christensenellaceae;Christensenellaceae R-7 group | 3.95   | 2.35 | Day08-14-Day15-24 |
| OTU_71 Bacteria;Actinobacteria;Coriobacteriia;Coriobacteriales;Coriobacteriaceae;Olsenella             | 12.89  | 2.88 | Day08-14-Day15-24 |
| OTU_422 Bacteria;Firmicutes;Clostridia;Clostridiales;Christensenellaceae;Christensenellaceae R-7 group | 5.90   | 2.05 | Day08-14-Day15-24 |
| OTU_367 Bacteria;Tenericutes;Mollicutes;Mollicutes RF9                                                 | 3.25   | 2.21 | Day08-14-Day15-24 |
| OTU_291 Bacteria;Firmicutes;Clostridia;Clostridiales;Lachnospiraceae;Lachnospiraceae NK4A136 group     | 3.47   | 2.32 | Day08-14-Day15-24 |
| OTU_68 Bacteria;Firmicutes;Clostridia;Clostridiales;Ruminococcaceae;Hydrogenoanaerobacterium           | 99.81  | 3.08 | Day08-14-Day15-24 |
| OTU_1194 Bacteria;Firmicutes;Clostridia;Clostridiales;Ruminococcaceae;Ruminococcaceae UCG-014          | 14.01  | 2.35 | Day08-14-Day15-24 |
| OTU_132 Bacteria;Firmicutes;Clostridia;Clostridiales;Ruminococcaceae;Ruminiclostridium 5               | 90.58  | 2.35 | Day08-14-Day15-24 |
| OTU_282 Bacteria;Firmicutes;Clostridia;Clostridiales;Ruminococcaceae;Ruminococcaceae UCG-005           | 3.15   | 2.16 | Day08-14-Day15-24 |

|                                                                                                        |        |      |                   |
|--------------------------------------------------------------------------------------------------------|--------|------|-------------------|
| OTU_311 Bacteria;Firmicutes;Clostridia;Clostridiales;Clostridiales vadinBB60 group                     | 3.33   | 2.25 | Day08-14-Day15-24 |
| OTU_285 Bacteria;Firmicutes;Clostridia;Clostridiales;Lachnospiraceae;Roseburia                         | 15.67  | 2.03 | Day08-14-Day15-24 |
| OTU_322 Bacteria;Firmicutes;Clostridia;Clostridiales;Lachnospiraceae;Tyzzerella                        | 3.16   | 2.19 | Day08-14-Day15-24 |
| OTU_390 Bacteria;Firmicutes;Clostridia;Clostridiales;Ruminococcaceae;Ruminococcaceae UCG-014           | 9.20   | 2.18 | Day08-14-Day15-24 |
| OTU_605 Bacteria;Firmicutes;Clostridia;Clostridiales;Ruminococcaceae;Ruminococcaceae UCG-014           | 63.31  | 2.07 | Day08-14-Day15-24 |
| OTU_3471 Bacteria;Actinobacteria;Coriobacteriia;Coriobacteriales;Coriobacteriaceae;Olsenella           | 7.95   | 2.54 | Day08-14-Day15-24 |
| OTU_47 Bacteria;Firmicutes;Clostridia;Clostridiales;Clostridiales vadinBB60 group                      | 53.47  | 2.70 | Day08-14-Day15-24 |
| OTU_2618 Bacteria;Firmicutes;Clostridia;Clostridiales;Ruminococcaceae;Intestinimonas                   | 49.41  | 2.38 | Day08-14-Day15-24 |
| OTU_168 Bacteria;Firmicutes;Clostridia;Clostridiales;Ruminococcaceae;Ruminococcaceae UCG-014           | 226.03 | 2.17 | Day08-14-Day15-24 |
| OTU_296 Bacteria;Firmicutes;Clostridia;Clostridiales;Peptostreptococcaceae;Intestinibacter             | 5.42   | 2.08 | Day08-14-Day15-24 |
| OTU_198 Bacteria;Firmicutes;Clostridia;Clostridiales;Ruminococcaceae;Faecalibacterium                  | 43.74  | 2.23 | Day08-14-Day15-24 |
| OTU_4604 Bacteria;Firmicutes;Clostridia;Clostridiales;Clostridiales vadinBB60 group                    | 12.66  | 2.43 | Day08-14-Day15-24 |
| OTU_89 Bacteria;Firmicutes;Clostridia;Clostridiales;Ruminococcaceae;Ruminococcaceae UCG-014            | 119.98 | 2.03 | Day08-14-Day15-24 |
| OTU_2398 Bacteria;Firmicutes;Clostridia;Clostridiales;Ruminococcaceae                                  | 3.54   | 2.00 | Day08-14-Day15-24 |
| OTU_6012 Bacteria;Firmicutes;Clostridia;Clostridiales;Ruminococcaceae;Hydrogenoanaerobacterium         | 55.27  | 2.67 | Day08-14-Day15-24 |
| OTU_64 Bacteria;Firmicutes;Clostridia;Clostridiales;Ruminococcaceae;Ruminiclostridium 5                | 57.47  | 2.89 | Day08-14-Day15-24 |
| OTU_261 Bacteria;Firmicutes;Clostridia;Clostridiales;Christensenellaceae;Christensenellaceae R-7 group | 2.93   | 2.04 | Day08-14-Day15-24 |
| OTU_271 Bacteria;Firmicutes;Clostridia;Clostridiales;Lachnospiraceae                                   | 5.35   | 2.09 | Day08-14-Day15-24 |

|                                                                                                                      |        |      |                   |
|----------------------------------------------------------------------------------------------------------------------|--------|------|-------------------|
| OTU_12293 Bacteria;Firmicutes;Clostridia;Clostridiales;Ruminococcaceae;Ruminiclostridium 5                           | 44.09  | 2.22 | Day08-14-Day15-24 |
| OTU_178 Bacteria;Firmicutes;Clostridia;Clostridiales;Ruminococcaceae;Anaerotruncus                                   | 53.06  | 2.09 | Day08-14-Day15-24 |
| OTU_109 Bacteria;Firmicutes;Clostridia;Clostridiales;Ruminococcaceae;Ruminococcaceae UCG-014                         | 171.14 | 2.06 | Day08-14-Day15-24 |
| OTU_6707 Bacteria;Firmicutes;Clostridia;Clostridiales;Ruminococcaceae                                                | 196.56 | 2.59 | Day08-14-Day15-24 |
| OTU_3463 Bacteria;Firmicutes;Clostridia;Clostridiales;Ruminococcaceae                                                | 232.87 | 2.24 | Day08-14-Day15-24 |
| OTU_21 Bacteria;Firmicutes;Clostridia;Clostridiales;Ruminococcaceae                                                  | 511.16 | 2.44 | Day08-14-Day15-24 |
| OTU_218 Bacteria;Firmicutes;Clostridia;Clostridiales;Ruminococcaceae;Butyricicoccus;Butyricicoccus pullicaecorum 1.2 | 50.48  | 2.03 | Day08-14-Day15-24 |
| OTU_293 Bacteria;Firmicutes;Clostridia;Clostridiales;Clostridiales vadinBB60 group                                   | 102.58 | 2.38 | Day08-14-Day15-24 |
| OTU_145 Bacteria;Firmicutes;Clostridia;Clostridiales;Clostridiales vadinBB60 group                                   | 139.30 | 7.98 | Day15-24-Day25-35 |
| OTU_58 Bacteria;Cyanobacteria;Melainabacteria;Gastranaerophilales                                                    | 900.13 | 9.81 | Day15-24-Day25-35 |
| OTU_160 Bacteria;Firmicutes;Clostridia;Thermoanaerobacterales;Thermoanaerobacteraceae;Gelria                         | 82.01  | 6.61 | Day15-24-Day25-35 |
| OTU_143 Bacteria;Firmicutes;Clostridia;Clostridiales;Clostridiales vadinBB60 group                                   | 120.12 | 7.06 | Day15-24-Day25-35 |
| OTU_221 Bacteria;Firmicutes;Clostridia;Clostridiales;Lachnospiraceae;Lachnoclostridium                               | 48.19  | 6.25 | Day15-24-Day25-35 |
| OTU_85 Bacteria;Firmicutes;Clostridia;Clostridiales;Clostridiales vadinBB60 group                                    | 73.47  | 7.07 | Day15-24-Day25-35 |
| OTU_288 Bacteria;Firmicutes;Clostridia;Clostridiales;Ruminococcaceae;Anaerotruncus                                   | 28.95  | 4.91 | Day15-24-Day25-35 |
| OTU_120 Bacteria;Firmicutes;Clostridia;Clostridiales;Clostridiales vadinBB60 group                                   | 97.46  | 6.93 | Day15-24-Day25-35 |
| OTU_211 Bacteria;Tenericutes;Mollicutes;NB1-n                                                                        | 55.87  | 6.57 | Day15-24-Day25-35 |
| OTU_308 Bacteria;Firmicutes;Clostridia;Clostridiales;Ruminococcaceae;Ruminococcaceae UCG-014                         | 21.44  | 5.28 | Day15-24-Day25-35 |

|                                                                                                |        |       |                   |
|------------------------------------------------------------------------------------------------|--------|-------|-------------------|
| OTU_343 Bacteria;Firmicutes;Clostridia;Clostridiales;Ruminococcaceae;Ruminiclostridium 9       | 620.73 | 2.98  | Day15-24-Day25-35 |
| OTU_341 Bacteria;Firmicutes;Clostridia;Clostridiales;Ruminococcaceae;Ruminococcaceae UCG-014   | 17.13  | 4.53  | Day15-24-Day25-35 |
| OTU_625 Bacteria;Firmicutes;Clostridia;Clostridiales;Ruminococcaceae                           | 29.50  | 4.00  | Day15-24-Day25-35 |
| OTU_13431 Bacteria;Firmicutes;Clostridia;Thermoanaerobacterales;Thermoanaerobacteraceae;Gelria | 34.18  | 5.11  | Day15-24-Day25-35 |
| OTU_8121 Bacteria;Firmicutes;Clostridia;Clostridiales;Clostridiales vadinBB60 group            | 31.11  | 5.85  | Day15-24-Day25-35 |
| OTU_430 Bacteria;Firmicutes;Clostridia;Clostridiales;Lachnospiraceae                           | 9.34   | 3.40  | Day15-24-Day25-35 |
| OTU_347 Bacteria;Firmicutes;Clostridia;Clostridiales;Ruminococcaceae;Ruminococcaceae UCG-010   | 18.21  | 5.03  | Day15-24-Day25-35 |
| OTU_146 Bacteria;Firmicutes;Clostridia;Clostridiales;Ruminococcaceae                           | 109.29 | 4.96  | Day15-24-Day25-35 |
| OTU_293 Bacteria;Firmicutes;Clostridia;Clostridiales;Clostridiales vadinBB60 group             | 98.26  | -5.68 | Day15-24-Day25-35 |
| OTU_339 Bacteria;Firmicutes;Clostridia;Clostridiales;Ruminococcaceae;Ruminiclostridium 5       | 17.88  | 2.86  | Day15-24-Day25-35 |
| OTU_350 Bacteria;Firmicutes;Clostridia;Clostridiales;Ruminococcaceae                           | 17.76  | 3.21  | Day15-24-Day25-35 |
| OTU_496 Bacteria;Firmicutes;Clostridia;Clostridiales;Ruminococcaceae                           | 8.16   | 2.89  | Day15-24-Day25-35 |
| OTU_671 Bacteria;Firmicutes;Clostridia;Clostridiales;Ruminococcaceae;Ruminococcaceae UCG-014   | 13.18  | 4.04  | Day15-24-Day25-35 |
| OTU_144 Bacteria;Firmicutes;Clostridia;Clostridiales;Clostridiales vadinBB60 group             | 51.35  | -4.37 | Day15-24-Day25-35 |
| OTU_338 Bacteria;Firmicutes;Clostridia;Clostridiales;Ruminococcaceae                           | 18.09  | 3.71  | Day15-24-Day25-35 |
| OTU_298 Bacteria;Firmicutes;Clostridia;Clostridiales;Ruminococcaceae;Ruminiclostridium 9       | 116.07 | 2.55  | Day15-24-Day25-35 |
| OTU_244 Bacteria;Firmicutes;Clostridia;Clostridiales;Clostridiales vadinBB60 group             | 29.45  | 5.01  | Day15-24-Day25-35 |
| OTU_404 Bacteria;Firmicutes;Clostridia;Clostridiales;Ruminococcaceae;Ruminococcaceae UCG-002   | 10.09  | 3.86  | Day15-24-Day25-35 |

|                                                                                                            |        |      |                   |
|------------------------------------------------------------------------------------------------------------|--------|------|-------------------|
| OTU_640 Bacteria;Firmicutes;Clostridia;Clostridiales;Clostridiales vadinBB60 group                         | 12.65  | 4.39 | Day15-24-Day25-35 |
| OTU_1020 Bacteria;Firmicutes;Clostridia;Clostridiales;Ruminococcaceae;Ruminococcaceae UCG-014              | 23.11  | 4.15 | Day15-24-Day25-35 |
| OTU_277 Bacteria;Firmicutes;Clostridia;Clostridiales;Clostridiales vadinBB60 group                         | 24.63  | 4.62 | Day15-24-Day25-35 |
| OTU_697 Bacteria;Firmicutes;Clostridia;Clostridiales;Ruminococcaceae;Ruminococcaceae UCG-014               | 11.56  | 4.11 | Day15-24-Day25-35 |
| OTU_216 Bacteria;Firmicutes;Clostridia;Clostridiales;Clostridiales vadinBB60 group                         | 46.16  | 4.37 | Day15-24-Day25-35 |
| OTU_282 Bacteria;Firmicutes;Clostridia;Clostridiales;Ruminococcaceae;Ruminococcaceae UCG-005               | 31.78  | 3.32 | Day15-24-Day25-35 |
| OTU_161 Bacteria;Firmicutes;Clostridia;Clostridiales;Family XII;Fusibacter                                 | 132.46 | 4.35 | Day15-24-Day25-35 |
| OTU_355 Bacteria;Firmicutes;Clostridia;Clostridiales;Clostridiales vadinBB60 group                         | 12.62  | 4.27 | Day15-24-Day25-35 |
| OTU_410 Bacteria;Firmicutes;Clostridia;Clostridiales;Ruminococcaceae;Subdoligranulum                       | 23.11  | 4.51 | Day15-24-Day25-35 |
| OTU_379 Bacteria;Firmicutes;Clostridia;Clostridiales;Ruminococcaceae;[Eubacterium] coprostanoligenes group | 7.50   | 3.68 | Day15-24-Day25-35 |
| OTU_530 Bacteria;Actinobacteria;Coriobacteriia;Coriobacteriales;Coriobacteriaceae;Gordonibacter            | 4.96   | 2.88 | Day15-24-Day25-35 |
| OTU_141 Bacteria;Firmicutes;Clostridia;Clostridiales;Lachnospiraceae                                       | 194.57 | 4.91 | Day15-24-Day25-35 |
| OTU_542 Bacteria;Firmicutes;Clostridia;Clostridiales;Clostridiaceae 1                                      | 6.06   | 2.87 | Day15-24-Day25-35 |
| OTU_572 Bacteria;Firmicutes;Clostridia;Clostridiales;Ruminococcaceae                                       | 5.30   | 3.18 | Day15-24-Day25-35 |
| OTU_577 Bacteria;Firmicutes;Clostridia;Clostridiales;Ruminococcaceae                                       | 28.51  | 3.14 | Day15-24-Day25-35 |
| OTU_280 Bacteria;Firmicutes;Clostridia;Clostridiales;Ruminococcaceae;Anaerotruncus                         | 21.26  | 3.22 | Day15-24-Day25-35 |
| OTU_6791 Bacteria;Firmicutes;Clostridia;Clostridiales;Ruminococcaceae;Ruminococcaceae UCG-004              | 42.99  | 2.38 | Day15-24-Day25-35 |
| OTU_2200 Bacteria;Firmicutes;Clostridia;Clostridiales;Ruminococcaceae;Ruminococcaceae UCG-014              | 7.14   | 3.14 | Day15-24-Day25-35 |

|                                                                                                                         |        |       |                   |
|-------------------------------------------------------------------------------------------------------------------------|--------|-------|-------------------|
| OTU_278 Bacteria;Firmicutes;Clostridia;Clostridiales;Ruminococcaceae;Anaerotruncus                                      | 16.49  | -3.13 | Day15-24-Day25-35 |
| OTU_115 Bacteria;Actinobacteria;Coriobacteriia;Coriobacteriales;Coriobacteriaceae;Collinsella;Enorma massiliensis pH    | 184.33 | 4.87  | Day15-24-Day25-35 |
| OTU_557 Bacteria;Tenericutes;Mollicutes;Mollicutes RF9                                                                  | 5.43   | 2.82  | Day15-24-Day25-35 |
| OTU_270 Bacteria;Firmicutes;Clostridia;Clostridiales;Ruminococcaceae;Anaerotruncus                                      | 31.95  | 2.62  | Day15-24-Day25-35 |
| OTU_165 Bacteria;Firmicutes;Clostridia;Clostridiales;Ruminococcaceae;Ruminococcaceae UCG-014                            | 149.80 | 4.40  | Day15-24-Day25-35 |
| OTU_549 Bacteria;Firmicutes;Clostridia;Clostridiales;Peptococcaceae                                                     | 5.28   | 3.17  | Day15-24-Day25-35 |
| OTU_481 Bacteria;Firmicutes;Clostridia;Clostridiales;Ruminococcaceae;Hydrogenoanaerobacterium                           | 6.78   | 2.29  | Day15-24-Day25-35 |
| OTU_398 Bacteria;Firmicutes;Clostridia;Clostridiales;Lachnospiraceae;Roseburia                                          | 6.82   | 3.54  | Day15-24-Day25-35 |
| OTU_392 Bacteria;Firmicutes;Clostridia;Clostridiales;Ruminococcaceae;Ruminiclostridium 9                                | 14.64  | 2.21  | Day15-24-Day25-35 |
| OTU_3813 Bacteria;Firmicutes;Clostridia;Clostridiales;Ruminococcaceae;Anaerotruncus                                     | 10.60  | -2.95 | Day15-24-Day25-35 |
| OTU_400 Bacteria;Firmicutes;Clostridia;Clostridiales;Ruminococcaceae;Anaerotruncus                                      | 10.69  | 2.81  | Day15-24-Day25-35 |
| OTU_322 Bacteria;Firmicutes;Clostridia;Clostridiales;Lachnospiraceae;Tyzzerella                                         | 21.49  | 3.01  | Day15-24-Day25-35 |
| OTU_140 Bacteria;Firmicutes;Clostridia;Clostridiales;Ruminococcaceae;Ruminococcaceae UCG-004                            | 107.30 | 2.43  | Day15-24-Day25-35 |
| OTU_365 Bacteria;Firmicutes;Clostridia;Clostridiales;Ruminococcaceae                                                    | 9.73   | 3.25  | Day15-24-Day25-35 |
| OTU_763 Bacteria;Firmicutes;Clostridia;Clostridiales;Ruminococcaceae;Ruminococcaceae UCG-005                            | 47.88  | 2.38  | Day15-24-Day25-35 |
| OTU_520 Bacteria;Firmicutes;Clostridia;Clostridiales;Peptococcaceae                                                     | 6.91   | 2.85  | Day15-24-Day25-35 |
| OTU_276 Bacteria;Proteobacteria;Gammaproteobacteria;Pasteurellales;Pasteurellaceae;Gallibacterium;Gallibacterium anatis | 14.63  | 3.35  | Day15-24-Day25-35 |

|                                                                                                   |        |       |                   |
|---------------------------------------------------------------------------------------------------|--------|-------|-------------------|
| OTU_47 Bacteria;Firmicutes;Clostridia;Clostridiales;Clostridiales vadinBB60 group                 | 531.12 | 3.55  | Day15-24-Day25-35 |
| OTU_585 Bacteria;Firmicutes;Clostridia;Clostridiales;Ruminococcaceae;Ruminococcaceae UCG-010      | 3.94   | 2.29  | Day15-24-Day25-35 |
| OTU_311 Bacteria;Firmicutes;Clostridia;Clostridiales;Clostridiales vadinBB60 group                | 55.18  | 3.47  | Day15-24-Day25-35 |
| OTU_580 Bacteria;Tenericutes;Mollicutes;Mollicutes RF9                                            | 3.86   | 2.55  | Day15-24-Day25-35 |
| OTU_3471 Bacteria;Actinobacteria;Coriobacteriia;Coriobacteriales;Coriobacteriaceae;Olsenella      | 197.09 | 4.30  | Day15-24-Day25-35 |
| OTU_548 Bacteria;Firmicutes;Clostridia;Clostridiales;Peptococcaceae                               | 6.75   | 2.33  | Day15-24-Day25-35 |
| OTU_2760 Bacteria;Firmicutes;Clostridia;Clostridiales;Ruminococcaceae;Anaerotruncus               | 189.84 | -2.95 | Day15-24-Day25-35 |
| OTU_46 Bacteria;Firmicutes;Clostridia;Clostridiales;Ruminococcaceae;Anaerotruncus                 | 359.69 | -2.94 | Day15-24-Day25-35 |
| OTU_200 Bacteria;Firmicutes;Clostridia;Clostridiales;Clostridiales vadinBB60 group                | 6.22   | 3.34  | Day15-24-Day25-35 |
| OTU_302 Bacteria;Firmicutes;Clostridia;Clostridiales;Lachnospiraceae;Lachnospiraceae FCS020 group | 21.20  | -2.37 | Day15-24-Day25-35 |
| OTU_304 Bacteria;Firmicutes;Clostridia;Clostridiales;Ruminococcaceae;Ruminococcaceae UCG-010      | 25.57  | 2.90  | Day15-24-Day25-35 |
| OTU_294 Bacteria;Cyanobacteria;Melainabacteria;Gastranaerophilales                                | 5.32   | 3.14  | Day15-24-Day25-35 |
| OTU_71 Bacteria;Actinobacteria;Coriobacteriia;Coriobacteriales;Coriobacteriaceae;Olsenella        | 321.67 | 4.29  | Day15-24-Day25-35 |
| OTU_203 Bacteria;Firmicutes;Clostridia;Clostridiales;Ruminococcaceae;Ruminococcaceae UCG-002      | 56.27  | 2.37  | Day15-24-Day25-35 |
| OTU_187 Bacteria;Firmicutes;Clostridia;Clostridiales;Ruminococcaceae;Ruminococcaceae UCG-014      | 32.88  | 3.78  | Day15-24-Day25-35 |
| OTU_547 Bacteria;Firmicutes;Clostridia;Clostridiales;Ruminococcaceae;Intestinimonas               | 6.03   | 2.32  | Day15-24-Day25-35 |
| OTU_15166 Bacteria;Firmicutes;Clostridia;Clostridiales;Ruminococcaceae;Intestinimonas             | 33.90  | 2.72  | Day15-24-Day25-35 |
| OTU_425 Bacteria;Firmicutes;Clostridia;Clostridiales;Clostridiales vadinBB60 group                | 4.72   | 2.80  | Day15-24-Day25-35 |



|                                                                                                             |        |       |                   |
|-------------------------------------------------------------------------------------------------------------|--------|-------|-------------------|
| OTU_442 Bacteria;Firmicutes;Clostridia;Clostridiales;Ruminococcaceae;Ruminococcaceae UCG-013                | 9.14   | 2.42  | Day15-24-Day25-35 |
| OTU_281 Bacteria;Firmicutes;Clostridia;Clostridiales;Ruminococcaceae;Ruminococcaceae UCG-014                | 27.93  | 2.94  | Day15-24-Day25-35 |
| OTU_158 Bacteria;Firmicutes;Clostridia;Clostridiales;Ruminococcaceae;Ruminococcaceae UCG-008                | 37.33  | 3.20  | Day15-24-Day25-35 |
| OTU_579 Bacteria;Firmicutes;Clostridia;Clostridiales;Ruminococcaceae;Ruminococcaceae NK4A214 group          | 5.14   | 2.28  | Day15-24-Day25-35 |
| OTU_13511 Bacteria;Firmicutes;Clostridia;Clostridiales;Ruminococcaceae;Ruminococcaceae UCG-005              | 5.65   | 2.37  | Day15-24-Day25-35 |
| OTU_372 Bacteria;Actinobacteria;Coriobacteriia;Coriobacteriales;Coriobacteriaceae;Coriobacteriaceae UCG-002 | 8.28   | 2.73  | Day15-24-Day25-35 |
| OTU_250 Bacteria;Firmicutes;Clostridia;Clostridiales;Ruminococcaceae                                        | 37.27  | 2.25  | Day15-24-Day25-35 |
| OTU_76 Bacteria;Firmicutes;Clostridia;Clostridiales;Ruminococcaceae;Ruminococcaceae UCG-014                 | 415.79 | 3.79  | Day15-24-Day25-35 |
| OTU_630 Bacteria;Firmicutes;Clostridia;Clostridiales;Ruminococcaceae;Intestinimonas                         | 106.71 | 2.89  | Day15-24-Day25-35 |
| OTU_853 Bacteria;Firmicutes;Clostridia;Clostridiales;Peptococcaceae                                         | 2.85   | 2.14  | Day15-24-Day25-35 |
| OTU_128 Bacteria;Firmicutes;Clostridia;Clostridiales;Ruminococcaceae;[Eubacterium] coprostanoligenes group  | 80.82  | -3.70 | Day15-24-Day25-35 |
| OTU_332 Bacteria;Firmicutes;Clostridia;Clostridiales;Ruminococcaceae;Ruminococcaceae UCG-008                | 5.84   | 2.83  | Day15-24-Day25-35 |
| OTU_153 Bacteria;Firmicutes;Clostridia;Clostridiales;Lachnospiraceae;[Eubacterium] oxidoreducens group      | 101.01 | 2.81  | Day15-24-Day25-35 |
| OTU_13399 Bacteria;Firmicutes;Clostridia;Clostridiales;Ruminococcaceae;Ruminococcaceae UCG-002              | 97.82  | 2.49  | Day15-24-Day25-35 |
| OTU_680 Bacteria;Firmicutes;Clostridia;Clostridiales;Ruminococcaceae;Ruminococcaceae UCG-014                | 9.12   | 2.91  | Day15-24-Day25-35 |
| OTU_7809 Bacteria;Firmicutes;Clostridia;Clostridiales;Lachnospiraceae;[Eubacterium] oxidoreducens group     | 54.13  | 2.64  | Day15-24-Day25-35 |
| OTU_1505 Bacteria;Firmicutes;Clostridia;Clostridiales;Ruminococcaceae;Ruminococcaceae UCG-014               | 3.65   | 2.21  | Day15-24-Day25-35 |
| OTU_317 Bacteria;Firmicutes;Clostridia;Clostridiales;Ruminococcaceae                                        | 22.02  | 2.36  | Day15-24-Day25-35 |

|                                                                                                                                        |        |      |                   |
|----------------------------------------------------------------------------------------------------------------------------------------|--------|------|-------------------|
| OTU_436 No blast hit                                                                                                                   | 3.45   | 2.48 | Day15-24-Day25-35 |
| OTU_464 Bacteria;Firmicutes;Clostridia;Clostridiales;Ruminococcaceae;Ruminiclostridium 5                                               | 3.98   | 2.52 | Day15-24-Day25-35 |
| OTU_291 Bacteria;Firmicutes;Clostridia;Clostridiales;Lachnospiraceae;Lachnospiraceae NK4A136 group                                     | 18.43  | 2.58 | Day15-24-Day25-35 |
| OTU_6396 Bacteria;Firmicutes;Clostridia;Clostridiales;Clostridiales vadinBB60 group                                                    | 512.09 | 3.06 | Day15-24-Day25-35 |
| OTU_775 Bacteria;Firmicutes;Clostridia;Clostridiales;Peptococcaceae                                                                    | 2.85   | 2.16 | Day15-24-Day25-35 |
| OTU_381 Bacteria;Firmicutes;Clostridia;Clostridiales;Clostridiales vadinBB60 group                                                     | 46.10  | 2.15 | Day15-24-Day25-35 |
| OTU_503 No blast hit                                                                                                                   | 3.74   | 2.03 | Day15-24-Day25-35 |
| OTU_135 Bacteria;Firmicutes;Clostridia;Clostridiales;Ruminococcaceae;Ruminococcaceae NK4A214 group                                     | 260.87 | 3.08 | Day15-24-Day25-35 |
| OTU_3901 Bacteria;Proteobacteria;Gammaproteobacteria;Enterobacteriales;Enterobacteriaceae;Escherichia-Shigella;Shigella flexneri K-671 | 14.27  | 2.32 | Day15-24-Day25-35 |
| OTU_655 Bacteria;Firmicutes;Clostridia;Clostridiales;Ruminococcaceae;Ruminiclostridium                                                 | 2.77   | 2.10 | Day15-24-Day25-35 |
| OTU_380 Bacteria;Firmicutes;Clostridia;Clostridiales;Clostridiales vadinBB60 group                                                     | 422.96 | 2.15 | Day15-24-Day25-35 |
| OTU_100 Bacteria;Firmicutes;Clostridia;Clostridiales;Clostridiales vadinBB60 group                                                     | 402.31 | 2.43 | Day15-24-Day25-35 |
| OTU_2893 Bacteria;Firmicutes;Clostridia;Clostridiales;Ruminococcaceae;Ruminococcaceae UCG-014                                          | 4.84   | 2.08 | Day15-24-Day25-35 |
| OTU_761 Bacteria;Firmicutes;Clostridia;Clostridiales;Ruminococcaceae;Hydrogenoanaerobacterium                                          | 2.67   | 2.04 | Day15-24-Day25-35 |
| OTU_6645 Bacteria;Firmicutes;Clostridia;Clostridiales;Clostridiales vadinBB60 group                                                    | 179.75 | 3.40 | Day15-24-Day25-35 |
| OTU_534 Bacteria;Firmicutes;Clostridia;Clostridiales;Ruminococcaceae;Ruminiclostridium 5                                               | 8.06   | 2.02 | Day15-24-Day25-35 |
| OTU_555 No blast hit                                                                                                                   | 3.26   | 2.05 | Day15-24-Day25-35 |
| OTU_491 Bacteria;Firmicutes;Clostridia;Clostridiales;Ruminococcaceae;Ruminococcaceae UCG-014                                           | 10.10  | 2.32 | Day15-24-Day25-35 |

|                                                                                                             |         |       |                   |
|-------------------------------------------------------------------------------------------------------------|---------|-------|-------------------|
| OTU_439 Bacteria;Lentisphaerae;Lentisphaeria;Victivallales;Victivallaceae;Victivallis;Victivallis vadensis  | 2.98    | 2.18  | Day15-24-Day25-35 |
| OTU_177 Bacteria;Firmicutes;Clostridia;Clostridiales;Ruminococcaceae;Ruminococcaceae UCG-009                | 114.43  | 2.33  | Day15-24-Day25-35 |
| OTU_169 Bacteria;Firmicutes;Clostridia;Clostridiales;Lachnospiraceae                                        | 158.72  | 2.51  | Day15-24-Day25-35 |
| OTU_252 Bacteria;Firmicutes;Clostridia;Clostridiales;Lachnospiraceae;Coprococcus 1                          | 29.25   | 2.37  | Day15-24-Day25-35 |
| OTU_271 Bacteria;Firmicutes;Clostridia;Clostridiales;Lachnospiraceae                                        | 48.59   | 2.32  | Day15-24-Day25-35 |
| OTU_245 Bacteria;Firmicutes;Clostridia;Clostridiales;Ruminococcaceae                                        | 33.84   | 2.44  | Day15-24-Day25-35 |
| OTU_38 Bacteria;Firmicutes;Clostridia;Clostridiales;Ruminococcaceae                                         | 529.38  | -2.14 | Day15-24-Day25-35 |
| OTU_97 Bacteria;Firmicutes;Clostridia;Clostridiales;Christensenellaceae;Christensenellaceae R-7 group       | 287.01  | 2.03  | Day15-24-Day25-35 |
| OTU_1938 Bacteria;Firmicutes;Clostridia;Clostridiales;Ruminococcaceae                                       | 956.00  | 2.61  | Day15-24-Day25-35 |
| OTU_156 Bacteria;Firmicutes;Clostridia;Clostridiales;Ruminococcaceae;Oscillospira                           | 133.49  | 2.03  | Day15-24-Day25-35 |
| OTU_261 Bacteria;Firmicutes;Clostridia;Clostridiales;Christensenellaceae;Christensenellaceae R-7 group      | 37.88   | 2.33  | Day15-24-Day25-35 |
| OTU_316 Bacteria;Firmicutes;Clostridia;Clostridiales;Ruminococcaceae;Ruminococcaceae UCG-013                | 17.58   | 2.05  | Day15-24-Day25-35 |
| OTU_627 Bacteria;Firmicutes;Clostridia;Clostridiales;Lachnospiraceae;[Eubacterium] hallii group             | 9.47    | 2.01  | Day15-24-Day25-35 |
| OTU_209 Bacteria;Firmicutes;Clostridia;Clostridiales;Clostridiales vadinBB60 group                          | 63.75   | 2.22  | Day15-24-Day25-35 |
| OTU_4604 Bacteria;Firmicutes;Clostridia;Clostridiales;Clostridiales vadinBB60 group                         | 297.46  | 2.37  | Day15-24-Day25-35 |
| OTU_5826 Bacteria;Firmicutes;Clostridia;Clostridiales;Ruminococcaceae                                       | 191.24  | 2.25  | Day15-24-Day25-35 |
| OTU_8773 Bacteria;Firmicutes;Clostridia;Clostridiales;Ruminococcaceae;[Eubacterium] coprostanoligenes group | 264.42  | 2.38  | Day15-24-Day25-35 |
| OTU_7 Bacteria;Firmicutes;Clostridia;Clostridiales;Ruminococcaceae                                          | 1138.83 | 2.43  | Day15-24-Day25-35 |

|                                                                                                           |         |      |                   |
|-----------------------------------------------------------------------------------------------------------|---------|------|-------------------|
| OTU_201 Bacteria;Firmicutes;Clostridia;Clostridiales;Clostridiales vadinBB60 group                        | 93.80   | 2.33 | Day15-24-Day25-35 |
| OTU_102 Bacteria;Firmicutes;Clostridia;Clostridiales;Ruminococcaceae;Ruminiclostridium 9                  | 327.51  | 2.08 | Day15-24-Day25-35 |
| OTU_42 Bacteria;Firmicutes;Clostridia;Clostridiales;Clostridiales vadinBB60 group                         | 503.33  | 2.42 | Day15-24-Day25-35 |
| OTU_17 Bacteria;Firmicutes;Clostridia;Clostridiales;Clostridiales vadinBB60 group                         | 1202.77 | 2.37 | Day15-24-Day25-35 |
| OTU_66 Bacteria;Firmicutes;Clostridia;Clostridiales;Ruminococcaceae                                       | 367.68  | 2.23 | Day15-24-Day25-35 |
| OTU_15345 Bacteria;Firmicutes;Clostridia;Clostridiales;Clostridiales vadinBB60 group                      | 46.80   | 2.14 | Day15-24-Day25-35 |
| OTU_29 Bacteria;Firmicutes;Clostridia;Clostridiales;Ruminococcaceae;[Eubacterium] coprostanoligenes group | 694.79  | 2.37 | Day15-24-Day25-35 |
| OTU_15527 Bacteria;Firmicutes;Clostridia;Clostridiales;Ruminococcaceae;Ruminococcaceae UCG-014            | 114.74  | 2.02 | Day15-24-Day25-35 |
| OTU_192 Bacteria;Firmicutes;Clostridia;Clostridiales;Clostridiales vadinBB60 group                        | 48.17   | 2.23 | Day15-24-Day25-35 |

637

638 Supplementary Table 2: Differential analysis of genera that are up/down regulated between different groups (Adjusted P values  $\leq 0.05$ ) where positive log2  
639 fold change represent genera becoming abundant as we go forward in time. Here only the significant genera are shown for daily comparisons.  
640

| Genus                        | Base Mean | Log2 Fold | Group |
|------------------------------|-----------|-----------|-------|
| Ruminococcaceae UCG-002      | 27.48     | 4.73      | 03-04 |
| Ruminococcaceae UCG-014      | 84.78     | 4.17      | 03-04 |
| Ruminococcaceae UCG-005      | 10.12     | 3.50      | 03-04 |
| Lachnospiraceae;Lachnospira  | 19.72     | 2.71      | 04-05 |
| [Eubacterium] hallii group   | 83.69     | 2.48      | 04-05 |
| Enterobacter                 | 1975.82   | -2.55     | 04-05 |
| Candidatus Arthromitus       | 5.21      | 2.54      | 05-06 |
| Prevotellaceae;Prevotella 7  | 3.27      | 2.13      | 05-06 |
| Tyzzereella                  | 7.12      | 2.56      | 05-06 |
| Anaerofilum                  | 4.03      | 2.25      | 05-06 |
| Enterococcus                 | 65.50     | -3.33     | 05-06 |
| Defluviitaleaceae UCG-011    | 24.57     | -3.43     | 05-06 |
| Lachnospiraceae UCG-010      | 160.54    | 2.97      | 06-07 |
| Coprococcus 1                | 1124.60   | 2.09      | 06-07 |
| Shuttleworthia               | 145.95    | 2.13      | 06-07 |
| Brevibacillus                | 4.21      | -2.27     | 06-07 |
| Prevotella 7                 | 3.12      | -2.06     | 06-07 |
| Tyzzereella                  | 73.83     | 2.90      | 07-08 |
| Faecalibacterium             | 405.59    | 4.04      | 08-09 |
| Enterobacter                 | 35.00     | -3.30     | 08-09 |
| Family XIII UCG-001          | 4.18      | 2.19      | 09-10 |
| Roseburia                    | 10.30     | 2.26      | 09-10 |
| Tyzzereella                  | 488.55    | -2.38     | 09-10 |
| Corynebacterium 1            | 5.29      | 2.10      | 10-11 |
| Ruminococcaceae UCG-008      | 4.46      | 2.17      | 10-11 |
| Tyzzereella                  | 492.04    | 2.76      | 10-11 |
| Fusicatenibacter             | 694.62    | -3.07     | 10-11 |
| Lachnospiraceae FE2018 group | 507.70    | -2.97     | 10-11 |

|                                 |         |       |       |
|---------------------------------|---------|-------|-------|
| Ruminococcus 1                  | 19.47   | -2.54 | 10-11 |
| Defluviitaleaceae UCG-011       | 212.59  | -2.44 | 10-11 |
| Ruminococcaceae UCG-005         | 783.84  | -2.24 | 10-11 |
| Comamonadaceae; Delftia         | 5.50    | 2.03  | 12-13 |
| Ruminococcus 1                  | 50.97   | 3.13  | 12-13 |
| Butyricoccus                    | 26.20   | 3.16  | 12-13 |
| Megamonas                       | 13.32   | -2.73 | 12-13 |
| Faecalitalea                    | 37.63   | 3.47  | 13-14 |
| Enterorhabdus                   | 6.48    | -2.03 | 13-14 |
| Ruminococcus 1                  | 64.03   | 2.17  | 14-15 |
| Acetitomaculum                  | 38.98   | 2.17  | 14-15 |
| Family XIII UCG-001             | 20.64   | 2.39  | 14-15 |
| Bifidobacterium                 | 83.86   | 2.54  | 14-15 |
| Lachnospiraceae FCS020 group    | 303.03  | 2.57  | 14-15 |
| Lactobacillus                   | 1058.97 | 2.80  | 14-15 |
| Butyricoccus                    | 118.45  | 3.01  | 14-15 |
| Faecalitalea                    | 35.59   | -4.53 | 14-15 |
| Escherichia-Shigella            | 3107.38 | -2.08 | 14-15 |
| Enterobacteriaceae;Enterobacter | 3.81    | -2.05 | 14-15 |
| Streptococcus                   | 8.08    | 2.91  | 15-16 |
| Ruminococcaceae UCG-009         | 334.48  | 2.44  | 16-17 |
| Ruminococcaceae V9D2013 group   | 10.84   | 3.39  | 16-17 |
| Erysipelatoclostridium          | 423.97  | -2.09 | 16-17 |
| Marvinbryantia                  | 22.84   | -2.70 | 16-17 |
| Intestinimonas                  | 538.49  | 2.23  | 16-17 |
| Tyzzarella 3                    | 171.81  | -2.19 | 16-17 |
| Campylobacter                   | 3.74    | -2.35 | 16-17 |
| Hydrogenoanaerobacterium        | 21.04   | 2.82  | 17-18 |
| Ruminococcaceae UCG-008         | 10.47   | 2.52  | 18-19 |
| Ruminococcaceae UCG-004         | 40.26   | 2.15  | 18-19 |
| Oscillospira                    | 12.08   | 2.56  | 18-19 |
| Intestinimonas                  | 1028.88 | 2.10  | 19-20 |
| Escherichia-Shigella            | 1946.88 | -2.68 | 19-20 |
| Proteus                         | 4.49    | 2.02  | 20-21 |
| Bacillus                        | 329.21  | 2.52  | 23-24 |

|                            |         |       |       |
|----------------------------|---------|-------|-------|
| Holdemania                 | 11.81   | 2.29  | 23-24 |
| Faecalibacterium           | 8727.64 | 2.15  | 23-24 |
| Oscillibacter              | 11.58   | 2.00  | 25-26 |
| Collinsella                | 11.63   | -2.31 | 25-26 |
| Lachnospiraceae UCG-006    | 6.87    | 2.46  | 26-27 |
| Erysipelotrichaceae;Dielma | 3.46    | 2.17  | 26-27 |
| Intestinibacter            | 22.43   | 2.78  | 27-28 |
| Dielma                     | 3.57    | -2.30 | 27-28 |
| Lachnospiraceae UCG-006    | 7.16    | -2.41 | 27-28 |
| Faecalitalea               | 21.99   | -2.02 | 27-28 |
| Coriobacteriaceae UCG-002  | 25.30   | 3.37  | 28-29 |
| Bacillus                   | 562.14  | 3.18  | 30-31 |

641

642 Supplementary Table 3: Differential analysis of pathways becoming significant based on Kruskal-Wallis test (Adjusted P values  $\leq 0.05$ ). Here results are shown  
 643 for both daily and weekly comparisons.

| KEGG KOs                                                        | P Values    | Adjusted P Values | Upregulated | Group Comparison |
|-----------------------------------------------------------------|-------------|-------------------|-------------|------------------|
| ko00061; Fatty acid biosynthesis                                | 0.007911789 | 0.037310224       | 03          | 03 - 04          |
| ko00240; Pyrimidine metabolism                                  | 0.009374768 | 0.037310224       | 04          | 03 - 04          |
| ko00250; Alanine, aspartate and glutamate metabolism            | 0.006656727 | 0.037310224       | 04          | 03 - 04          |
| ko00290; Valine, leucine and isoleucine biosynthesis            | 0.009374768 | 0.037310224       | 04          | 03 - 04          |
| ko00330; Arginine and proline metabolism                        | 0.009374768 | 0.037310224       | 04          | 03 - 04          |
| ko00350; Tyrosine metabolism                                    | 0.011074438 | 0.037310224       | 04          | 03 - 04          |
| ko00460; Cyanoamino acid metabolism                             | 0.002213692 | 0.037310224       | 03          | 03 - 04          |
| ko00524; Butirosin and neomycin biosynthesis                    | 0.009374768 | 0.037310224       | 03          | 03 - 04          |
| ko00562; Inositol phosphate metabolism                          | 0.006656727 | 0.037310224       | 03          | 03 - 04          |
| ko00624; Polycyclic aromatic hydrocarbon degradation            | 0.01304252  | 0.037310224       | 04          | 03 - 04          |
| ko00730; Thiamine metabolism                                    | 0.011074438 | 0.037310224       | 04          | 03 - 04          |
| ko00740; Riboflavin metabolism                                  | 0.01304252  | 0.037310224       | 03          | 03 - 04          |
| ko00750; Vitamin B6 metabolism                                  | 0.007911789 | 0.037310224       | 04          | 03 - 04          |
| ko00770; Pantothenate and CoA biosynthesis                      | 0.009374768 | 0.037310224       | 04          | 03 - 04          |
| ko00780; Biotin metabolism                                      | 0.01304252  | 0.037310224       | 04          | 03 - 04          |
| ko00906; Carotenoid biosynthesis                                | 0.01304252  | 0.037310224       | 04          | 03 - 04          |
| ko00960; Tropane, piperidine and pyridine alkaloid biosynthesis | 0.007911789 | 0.037310224       | 03          | 03 - 04          |
| ko01051; Biosynthesis of ansamycins                             | 0.009374768 | 0.037310224       | 03          | 03 - 04          |
| ko02010; ABC transporters                                       | 0.009374768 | 0.037310224       | 03          | 03 - 04          |
| ko03008; Ribosome biogenesis in eukaryotes                      | 0.011074438 | 0.037310224       | 03          | 03 - 04          |
| ko03018; RNA degradation                                        | 0.006656727 | 0.037310224       | 03          | 03 - 04          |
| ko03410; Base excision repair                                   | 0.011074438 | 0.037310224       | 03          | 03 - 04          |
| ko04020; Calcium signaling pathway                              | 0.009374768 | 0.037310224       | 04          | 03 - 04          |
| ko04122; Sulfur relay system                                    | 0.009374768 | 0.037310224       | 04          | 03 - 04          |
| ko04141; Protein processing in endoplasmic reticulum            | 0.007911789 | 0.037310224       | 04          | 03 - 04          |
| ko04146; Peroxisome                                             | 0.007911789 | 0.037310224       | 03          | 03 - 04          |
| ko04260; Cardiac muscle contraction                             | 0.011074438 | 0.037310224       | 03          | 03 - 04          |
| ko04370; VEGF signaling pathway                                 | 0.011074438 | 0.037310224       | 04          | 03 - 04          |
| ko04626; Plant-pathogen interaction                             | 0.007911789 | 0.037310224       | 03          | 03 - 04          |
| ko04666; Fc gamma R-mediated phagocytosis                       | 0.009374768 | 0.037310224       | 04          | 03 - 04          |
| ko04728; Dopaminergic synapse                                   | 0.01304252  | 0.037310224       | 03          | 03 - 04          |



|                                                      |             |             |    |         |
|------------------------------------------------------|-------------|-------------|----|---------|
| ko04930; Type II diabetes mellitus                   | 0.011074438 | 0.037310224 | 03 | 03 - 04 |
| ko04974; Protein digestion and absorption            | 0.007911789 | 0.037310224 | 03 | 03 - 04 |
| ko05030; Cocaine addiction                           | 0.005583617 | 0.037310224 | 03 | 03 - 04 |
| ko05031; Amphetamine addiction                       | 0.005583617 | 0.037310224 | 03 | 03 - 04 |
| ko05034; Alcoholism                                  | 0.01304252  | 0.037310224 | 03 | 03 - 04 |
| ko00190; Oxidative phosphorylation                   | 0.015313822 | 0.03909974  | 04 | 03 - 04 |
| ko00561; Glycerolipid metabolism                     | 0.015313822 | 0.03909974  | 03 | 03 - 04 |
| ko04070; Phosphatidylinositol signaling system       | 0.015313822 | 0.03909974  | 03 | 03 - 04 |
| ko04112; Cell cycle - Caulobacter                    | 0.015313822 | 0.03909974  | 04 | 03 - 04 |
| ko04726; Serotonergic synapse                        | 0.015313822 | 0.03909974  | 03 | 03 - 04 |
| ko05032; Morphine addiction                          | 0.015313822 | 0.03909974  | 03 | 03 - 04 |
| ko05203; Viral carcinogenesis                        | 0.015313822 | 0.03909974  | 03 | 03 - 04 |
| ko04144; Endocytosis                                 | 0.000219851 | 0.007285107 | 05 | 05-06   |
| ko04912; GnRH signaling pathway                      | 0.000219851 | 0.007285107 | 05 | 05-06   |
| ko05012; Parkinsons disease                          | 0.000219851 | 0.007285107 | 05 | 05-06   |
| ko00030; Pentose phosphate pathway                   | 0.001822735 | 0.013247142 | 05 | 05-06   |
| ko00053; Ascorbate and aldarate metabolism           | 0.002213692 | 0.013247142 | 05 | 05-06   |
| ko00100; Steroid biosynthesis                        | 0.001822735 | 0.013247142 | 05 | 05-06   |
| ko00196; Photosynthesis - antenna proteins           | 0.002208779 | 0.013247142 | 05 | 05-06   |
| ko00540; Lipopolysaccharide biosynthesis             | 0.000998686 | 0.013247142 | 05 | 05-06   |
| ko00592; alpha-Linolenic acid metabolism             | 0.000275504 | 0.013247142 | 05 | 05-06   |
| ko00623; Toluene degradation                         | 0.000275504 | 0.013247142 | 05 | 05-06   |
| ko00965; Betalain biosynthesis                       | 0.000532006 | 0.013247142 | 05 | 05-06   |
| ko00984; Steroid degradation                         | 0.001496164 | 0.013247142 | 05 | 05-06   |
| ko01057; Biosynthesis of type II polyketide products | 0.000998686 | 0.013247142 | 05 | 05-06   |
| ko02060; Phosphotransferase system (PTS)             | 0.001224283 | 0.013247142 | 05 | 05-06   |
| ko04610; Complement and coagulation cascades         | 0.001221273 | 0.013247142 | 05 | 05-06   |
| ko05014; Amyotrophic lateral sclerosis (ALS)         | 0.000998686 | 0.013247142 | 05 | 05-06   |
| ko05020; Prion diseases                              | 0.000658337 | 0.013247142 | 05 | 05-06   |
| ko05131; Shigellosis                                 | 0.001221273 | 0.013247142 | 05 | 05-06   |
| ko05142; Chagas disease (American trypanosomiasis)   | 0.001822735 | 0.013247142 | 05 | 05-06   |
| ko05204; Chemical carcinogenesis                     | 0.001224283 | 0.013247142 | 05 | 05-06   |
| ko00363; Bisphenol degradation                       | 0.002680172 | 0.036672283 | 05 | 05-06   |
| ko00630; Glyoxylate and dicarboxylate metabolism     | 0.002680172 | 0.036672283 | 05 | 05-06   |
| ko00901; Indole alkaloid biosynthesis                | 0.002680172 | 0.036672283 | 05 | 05-06   |

|                                                                 |             |             |    |         |
|-----------------------------------------------------------------|-------------|-------------|----|---------|
| ko00920; Sulfur metabolism                                      | 0.002680172 | 0.036672283 | 05 | 05-06   |
| ko00945; Stilbenoid, diarylheptanoid and gingerol biosynthesis  | 0.002680172 | 0.036672283 | 05 | 05-06   |
| ko00980; Metabolism of xenobiotics by cytochrome P450           | 0.002680172 | 0.036672283 | 05 | 05-06   |
| ko00982; Drug metabolism - cytochrome P450                      | 0.002680172 | 0.036672283 | 05 | 05-06   |
| ko05111; Vibrio cholerae pathogenic cycle                       | 0.002680172 | 0.036672283 | 05 | 05-06   |
| ko05132; Salmonella infection                                   | 0.002680172 | 0.036672283 | 05 | 05-06   |
| ko04115; p53 signaling pathway                                  | 0.00128048  | 0.028496707 | 10 | 10 -11  |
| ko00909; Sesquiterpenoid and triterpenoid biosynthesis          | 0.001702519 | 0.045759699 | 10 | 10 -11  |
| ko05168; Herpes simplex infection                               | 0.001702519 | 0.045759699 | 10 | 10 -11  |
| ko05210; Colorectal cancer                                      | 0.001702519 | 0.045759699 | 10 | 10 -11  |
| ko05416; Viral myocarditis                                      | 0.001702519 | 0.045759699 | 10 | 10 -11  |
| ko02040; Flagellar assembly                                     | 0.000165522 | 0.012327241 | 14 | 14 - 15 |
| ko05111; Vibrio cholerae pathogenic cycle                       | 0.000219473 | 0.012327241 | 14 | 14 - 15 |
| ko05130; Pathogenic Escherichia coli infection                  | 0.000380365 | 0.012327241 | 14 | 14 - 15 |
| ko00364; Fluorobenzoate degradation                             | 0.001078987 | 0.0146559   | 14 | 14 - 15 |
| ko00592; alpha-Linolenic acid metabolism                        | 0.001078987 | 0.0146559   | 14 | 14 - 15 |
| ko00633; Nitrotoluene degradation                               | 0.000646749 | 0.0146559   | 14 | 14 - 15 |
| ko00710; Carbon fixation in photosynthetic organisms            | 0.000497167 | 0.0146559   | 15 | 14 - 15 |
| ko03070; Bacterial secretion system                             | 0.000497167 | 0.0146559   | 14 | 14 - 15 |
| ko05132; Salmonella infection                                   | 0.000497167 | 0.0146559   | 14 | 14 - 15 |
| ko00240; Pyrimidine metabolism                                  | 0.001766337 | 0.01897042  | 15 | 14 - 15 |
| ko00760; Nicotinate and nicotinamide metabolism                 | 0.001383791 | 0.01897042  | 15 | 14 - 15 |
| ko00920; Sulfur metabolism                                      | 0.001383791 | 0.01897042  | 14 | 14 - 15 |
| ko00960; Tropane, piperidine and pyridine alkaloid biosynthesis | 0.001383791 | 0.01897042  | 14 | 14 - 15 |
| ko02020; Two-component system                                   | 0.001383791 | 0.01897042  | 14 | 14 - 15 |
| ko03440; Homologous recombination                               | 0.001766337 | 0.01897042  | 15 | 14 - 15 |
| ko05032; Morphine addiction                                     | 0.001383791 | 0.01897042  | 14 | 14 - 15 |
| ko05133; Pertussis                                              | 0.001383791 | 0.01897042  | 14 | 14 - 15 |
| ko00020; Citrate cycle (TCA cycle)                              | 0.002837545 | 0.022375931 | 14 | 14 - 15 |
| ko00232; Caffeine metabolism                                    | 0.003571236 | 0.022375931 | 14 | 14 - 15 |
| ko00281; Geraniol degradation                                   | 0.003571236 | 0.022375931 | 14 | 14 - 15 |
| ko00310; Lysine degradation                                     | 0.001766337 | 0.022375931 | 14 | 14 - 15 |
| ko00473; D-Alanine metabolism                                   | 0.002837545 | 0.022375931 | 15 | 14 - 15 |
| ko00511; Other glycan degradation                               | 0.003571236 | 0.022375931 | 15 | 14 - 15 |
| ko00603; Glycosphingolipid biosynthesis - globo series          | 0.003571236 | 0.022375931 | 15 | 14 - 15 |

|                                                                  |             |             |          |                     |
|------------------------------------------------------------------|-------------|-------------|----------|---------------------|
| ko00624; Polycyclic aromatic hydrocarbon degradation             | 0.002837545 | 0.022375931 | 15       | 14 - 15             |
| ko00630; Glyoxylate and dicarboxylate metabolism                 | 0.002837545 | 0.022375931 | 14       | 14 - 15             |
| ko00640; Propanoate metabolism                                   | 0.002244033 | 0.022375931 | 14       | 14 - 15             |
| ko00740; Riboflavin metabolism                                   | 0.003571236 | 0.022375931 | 14       | 14 - 15             |
| ko03030; DNA replication                                         | 0.003571236 | 0.022375931 | 15       | 14 - 15             |
| ko04113; Meiosis - yeast                                         | 0.002244033 | 0.022375931 | 14       | 14 - 15             |
| ko00791; Atrazine degradation                                    | 0.004473649 | 0.041073328 | 14       | 14 - 15             |
| ko00906; Carotenoid biosynthesis                                 | 0.004473649 | 0.041073328 | 15       | 14 - 15             |
| ko00910; Nitrogen metabolism                                     | 0.004473649 | 0.041073328 | 14       | 14 - 15             |
| ko01040; Biosynthesis of unsaturated fatty acids                 | 0.004473649 | 0.041073328 | 14       | 14 - 15             |
| ko03010; Ribosome                                                | 0.004473649 | 0.041073328 | 15       | 14 - 15             |
| ko05150; Staphylococcus aureus infection                         | 0.004473649 | 0.041073328 | 15       | 14 - 15             |
| ko00331; Clavulanic acid biosynthesis                            | 1.16E-09    | 4.38E-09    | Day03-07 | Day03-07 - Day08-14 |
| ko00592; alpha-Linolenic acid metabolism                         | 1.05E-09    | 4.38E-09    | Day03-07 | Day03-07 - Day08-14 |
| ko00920; Sulfur metabolism                                       | 1.07E-09    | 4.38E-09    | Day03-07 | Day03-07 - Day08-14 |
| ko04011; MAPK signaling pathway - yeast                          | 1.13E-09    | 4.38E-09    | Day08-14 | Day03-07 - Day08-14 |
| ko04723; Retrograde endocannabinoid signaling                    | 8.68E-10    | 4.38E-09    | Day03-07 | Day03-07 - Day08-14 |
| ko04726; Serotonergic synapse                                    | 8.91E-10    | 4.38E-09    | Day03-07 | Day03-07 - Day08-14 |
| ko05020; Prion diseases                                          | 4.30E-10    | 4.38E-09    | Day03-07 | Day03-07 - Day08-14 |
| ko05132; Salmonella infection                                    | 2.56E-10    | 4.38E-09    | Day03-07 | Day03-07 - Day08-14 |
| ko05133; Pertussis                                               | 8.01E-10    | 4.38E-09    | Day03-07 | Day03-07 - Day08-14 |
| ko05014; Amyotrophic lateral sclerosis (ALS)                     | 1.19E-09    | 6.19E-09    | Day03-07 | Day03-07 - Day08-14 |
| ko00380; Tryptophan metabolism                                   | 6.45E-09    | 1.99E-08    | Day03-07 | Day03-07 - Day08-14 |
| ko01053; Biosynthesis of siderophore group nonribosomal peptides | 5.26E-09    | 1.99E-08    | Day03-07 | Day03-07 - Day08-14 |
| ko04144; Endocytosis                                             | 5.98E-09    | 1.99E-08    | Day03-07 | Day03-07 - Day08-14 |
| ko04610; Complement and coagulation cascades                     | 5.13E-09    | 1.99E-08    | Day03-07 | Day03-07 - Day08-14 |
| ko04912; GnRH signaling pathway                                  | 5.98E-09    | 1.99E-08    | Day03-07 | Day03-07 - Day08-14 |
| ko05034; Alcoholism                                              | 3.15E-09    | 1.99E-08    | Day03-07 | Day03-07 - Day08-14 |
| ko05110; Vibrio cholerae infection                               | 1.36E-09    | 1.99E-08    | Day03-07 | Day03-07 - Day08-14 |
| ko05111; Vibrio cholerae pathogenic cycle                        | 4.63E-09    | 1.99E-08    | Day03-07 | Day03-07 - Day08-14 |
| ko05131; Shigellosis                                             | 4.40E-09    | 1.99E-08    | Day03-07 | Day03-07 - Day08-14 |
| ko05219; Bladder cancer                                          | 3.32E-09    | 1.99E-08    | Day03-07 | Day03-07 - Day08-14 |
| ko00030; Pentose phosphate pathway                               | 2.42E-08    | 8.26E-08    | Day03-07 | Day03-07 - Day08-14 |
| ko00480; Glutathione metabolism                                  | 1.67E-08    | 8.26E-08    | Day03-07 | Day03-07 - Day08-14 |
| ko00540; Lipopolysaccharide biosynthesis                         | 1.63E-08    | 8.26E-08    | Day03-07 | Day03-07 - Day08-14 |

|                                                                     |          |          |          |                     |
|---------------------------------------------------------------------|----------|----------|----------|---------------------|
| ko00562; Inositol phosphate metabolism                              | 2.73E-08 | 8.26E-08 | Day03-07 | Day03-07 - Day08-14 |
| ko00901; Indole alkaloid biosynthesis                               | 6.79E-09 | 8.26E-08 | Day03-07 | Day03-07 - Day08-14 |
| ko00965; Betalain biosynthesis                                      | 2.04E-08 | 8.26E-08 | Day03-07 | Day03-07 - Day08-14 |
| ko00982; Drug metabolism - cytochrome P450                          | 3.01E-08 | 8.26E-08 | Day03-07 | Day03-07 - Day08-14 |
| ko01040; Biosynthesis of unsaturated fatty acids                    | 1.15E-08 | 8.26E-08 | Day03-07 | Day03-07 - Day08-14 |
| ko05100; Bacterial invasion of epithelial cells                     | 2.94E-08 | 8.26E-08 | Day03-07 | Day03-07 - Day08-14 |
| ko05204; Chemical carcinogenesis                                    | 1.21E-08 | 8.26E-08 | Day03-07 | Day03-07 - Day08-14 |
| ko05340; Primary immunodeficiency                                   | 1.84E-08 | 8.26E-08 | Day03-07 | Day03-07 - Day08-14 |
| ko00564; Glycerophospholipid metabolism                             | 3.16E-08 | 1.95E-07 | Day03-07 | Day03-07 - Day08-14 |
| ko00980; Metabolism of xenobiotics by cytochrome P450               | 4.43E-08 | 1.95E-07 | Day03-07 | Day03-07 - Day08-14 |
| ko03010; Ribosome                                                   | 4.02E-08 | 1.95E-07 | Day08-14 | Day03-07 - Day08-14 |
| ko00196; Photosynthesis - antenna proteins                          | 6.04E-08 | 3.54E-07 | Day03-07 | Day03-07 - Day08-14 |
| ko05142; Chagas disease (American trypanosomiasis)                  | 4.76E-08 | 3.54E-07 | Day03-07 | Day03-07 - Day08-14 |
| ko05030; Cocaine addiction                                          | 7.66E-08 | 6.61E-07 | Day03-07 | Day03-07 - Day08-14 |
| ko05031; Amphetamine addiction                                      | 7.66E-08 | 6.61E-07 | Day03-07 | Day03-07 - Day08-14 |
| ko00310; Lysine degradation                                         | 1.85E-07 | 1.40E-06 | Day03-07 | Day03-07 - Day08-14 |
| ko00660; C5-Branched dibasic acid metabolism                        | 2.73E-07 | 1.40E-06 | Day03-07 | Day03-07 - Day08-14 |
| ko00945; Stilbenoid, diarylheptanoid and gingerol biosynthesis      | 9.46E-08 | 1.40E-06 | Day03-07 | Day03-07 - Day08-14 |
| ko04728; Dopaminergic synapse                                       | 2.03E-07 | 1.40E-06 | Day03-07 | Day03-07 - Day08-14 |
| ko05012; Parkinsons disease                                         | 2.79E-07 | 1.40E-06 | Day03-07 | Day03-07 - Day08-14 |
| ko00071; Fatty acid metabolism                                      | 1.15E-06 | 4.07E-06 | Day03-07 | Day03-07 - Day08-14 |
| ko00232; Caffeine metabolism                                        | 7.11E-07 | 4.07E-06 | Day03-07 | Day03-07 - Day08-14 |
| ko00363; Bisphenol degradation                                      | 1.68E-06 | 4.07E-06 | Day03-07 | Day03-07 - Day08-14 |
| ko00471; D-Glutamine and D-glutamate metabolism                     | 1.51E-06 | 4.07E-06 | Day08-14 | Day03-07 - Day08-14 |
| ko00601; Glycosphingolipid biosynthesis - lacto and neolacto series | 9.04E-07 | 4.07E-06 | Day08-14 | Day03-07 - Day08-14 |
| ko00642; Ethylbenzene degradation                                   | 2.86E-07 | 4.07E-06 | Day08-14 | Day03-07 - Day08-14 |
| ko00680; Methane metabolism                                         | 1.42E-06 | 4.07E-06 | Day08-14 | Day03-07 - Day08-14 |
| ko00830; Retinol metabolism                                         | 1.68E-06 | 4.07E-06 | Day03-07 | Day03-07 - Day08-14 |
| ko04727; GABAergic synapse                                          | 1.15E-06 | 4.07E-06 | Day08-14 | Day03-07 - Day08-14 |
| ko04940; Type I diabetes mellitus                                   | 4.09E-07 | 4.07E-06 | Day08-14 | Day03-07 - Day08-14 |
| ko05032; Morphine addiction                                         | 1.05E-06 | 4.07E-06 | Day03-07 | Day03-07 - Day08-14 |
| ko05130; Pathogenic Escherichia coli infection                      | 9.64E-07 | 4.07E-06 | Day03-07 | Day03-07 - Day08-14 |
| ko05164; Influenza A                                                | 1.76E-06 | 4.07E-06 | Day08-14 | Day03-07 - Day08-14 |
| ko05203; Viral carcinogenesis                                       | 1.83E-06 | 4.07E-06 | Day03-07 | Day03-07 - Day08-14 |
| ko00740; Riboflavin metabolism                                      | 1.95E-06 | 4.65E-06 | Day03-07 | Day03-07 - Day08-14 |

|                                                              |             |             |          |                     |
|--------------------------------------------------------------|-------------|-------------|----------|---------------------|
| ko04724; Glutamatergic synapse                               | 1.95E-06    | 4.65E-06    | Day08-14 | Day03-07 - Day08-14 |
| ko00630; Glyoxylate and dicarboxylate metabolism             | 2.08E-06    | 6.01E-06    | Day03-07 | Day03-07 - Day08-14 |
| ko00640; Propanoate metabolism                               | 2.26E-06    | 6.01E-06    | Day03-07 | Day03-07 - Day08-14 |
| ko04930; Type II diabetes mellitus                           | 2.41E-06    | 1.82E-05    | Day03-07 | Day03-07 - Day08-14 |
| ko00603; Glycosphingolipid biosynthesis - globo series       | 4.56E-06    | 2.31E-05    | Day08-14 | Day03-07 - Day08-14 |
| ko00860; Porphyrin and chlorophyll metabolism                | 5.93E-06    | 2.31E-05    | Day03-07 | Day03-07 - Day08-14 |
| ko04146; Peroxisome                                          | 4.65E-06    | 2.31E-05    | Day03-07 | Day03-07 - Day08-14 |
| ko04910; Insulin signaling pathway                           | 2.90E-06    | 2.31E-05    | Day03-07 | Day03-07 - Day08-14 |
| ko05168; Herpes simplex infection                            | 5.58E-06    | 2.31E-05    | Day08-14 | Day03-07 - Day08-14 |
| ko00130; Ubiquinone and other terpenoid-quinone biosynthesis | 6.05E-06    | 2.46E-05    | Day03-07 | Day03-07 - Day08-14 |
| ko04070; Phosphatidylinositol signaling system               | 6.96E-06    | 2.46E-05    | Day03-07 | Day03-07 - Day08-14 |
| ko00312; beta-Lactam resistance                              | 1.14E-05    | 2.59E-05    | Day08-14 | Day03-07 - Day08-14 |
| ko00350; Tyrosine metabolism                                 | 9.76E-06    | 2.59E-05    | Day08-14 | Day03-07 - Day08-14 |
| ko00400; Phenylalanine, tyrosine and tryptophan biosynthesis | 1.39E-05    | 2.59E-05    | Day08-14 | Day03-07 - Day08-14 |
| ko00623; Toluene degradation                                 | 1.56E-05    | 2.59E-05    | Day03-07 | Day03-07 - Day08-14 |
| ko00710; Carbon fixation in photosynthetic organisms         | 1.44E-05    | 2.59E-05    | Day08-14 | Day03-07 - Day08-14 |
| ko01057; Biosynthesis of type II polyketide products         | 1.33E-05    | 2.59E-05    | Day03-07 | Day03-07 - Day08-14 |
| ko02060; Phosphotransferase system (PTS)                     | 7.39E-06    | 2.59E-05    | Day03-07 | Day03-07 - Day08-14 |
| ko03008; Ribosome biogenesis in eukaryotes                   | 1.47E-05    | 2.59E-05    | Day03-07 | Day03-07 - Day08-14 |
| ko03018; RNA degradation                                     | 1.50E-05    | 2.59E-05    | Day03-07 | Day03-07 - Day08-14 |
| ko03060; Protein export                                      | 1.44E-05    | 2.59E-05    | Day08-14 | Day03-07 - Day08-14 |
| ko05210; Colorectal cancer                                   | 1.16E-05    | 2.59E-05    | Day08-14 | Day03-07 - Day08-14 |
| ko05416; Viral myocarditis                                   | 1.16E-05    | 2.59E-05    | Day08-14 | Day03-07 - Day08-14 |
| ko00061; Fatty acid biosynthesis                             | 1.59E-05    | 3.45E-05    | Day03-07 | Day03-07 - Day08-14 |
| ko00100; Steroid biosynthesis                                | 1.68E-05    | 8.68E-05    | Day03-07 | Day03-07 - Day08-14 |
| ko00340; Histidine metabolism                                | 1.96E-05    | 8.68E-05    | Day08-14 | Day03-07 - Day08-14 |
| ko00401; Novobiocin biosynthesis                             | 2.16E-05    | 0.000109709 | Day08-14 | Day03-07 - Day08-14 |
| ko00621; Dioxin degradation                                  | 2.51E-05    | 0.000109709 | Day08-14 | Day03-07 - Day08-14 |
| ko00010; Glycolysis / Gluconeogenesis                        | 6.52E-05    | 0.000145793 | Day03-07 | Day03-07 - Day08-14 |
| ko00053; Ascorbate and aldarate metabolism                   | 0.000110879 | 0.000145793 | Day03-07 | Day03-07 - Day08-14 |
| ko00140; Steroid hormone biosynthesis                        | 2.75E-05    | 0.000145793 | Day03-07 | Day03-07 - Day08-14 |
| ko00361; Chlorocyclohexane and chlorobenzene degradation     | 7.13E-05    | 0.000145793 | Day03-07 | Day03-07 - Day08-14 |
| ko00430; Taurine and hypotaurine metabolism                  | 0.000120947 | 0.000145793 | Day03-07 | Day03-07 - Day08-14 |
| ko00524; Butirosin and neomycin biosynthesis                 | 9.31E-05    | 0.000145793 | Day03-07 | Day03-07 - Day08-14 |
| ko00565; Ether lipid metabolism                              | 8.52E-05    | 0.000145793 | Day03-07 | Day03-07 - Day08-14 |

|                                                                 |             |             |          |                     |
|-----------------------------------------------------------------|-------------|-------------|----------|---------------------|
| ko00970; Aminoacyl-tRNA biosynthesis                            | 0.000114808 | 0.000145793 | Day08-14 | Day03-07 - Day08-14 |
| ko02040; Flagellar assembly                                     | 3.26E-05    | 0.000145793 | Day03-07 | Day03-07 - Day08-14 |
| ko03030; DNA replication                                        | 0.000107078 | 0.000145793 | Day08-14 | Day03-07 - Day08-14 |
| ko03450; Non-homologous end-joining                             | 7.53E-05    | 0.000145793 | Day03-07 | Day03-07 - Day08-14 |
| ko04310; Wnt signaling pathway                                  | 8.98E-05    | 0.000145793 | Day08-14 | Day03-07 - Day08-14 |
| ko04330; Notch signaling pathway                                | 8.98E-05    | 0.000145793 | Day08-14 | Day03-07 - Day08-14 |
| ko04514; Cell adhesion molecules (CAMs)                         | 6.25E-05    | 0.000145793 | Day08-14 | Day03-07 - Day08-14 |
| ko04640; Hematopoietic cell lineage                             | 6.76E-05    | 0.000145793 | Day08-14 | Day03-07 - Day08-14 |
| ko04721; Synaptic vesicle cycle                                 | 0.000108963 | 0.000145793 | Day08-14 | Day03-07 - Day08-14 |
| ko04725; Cholinergic synapse                                    | 6.41E-05    | 0.000145793 | Day03-07 | Day03-07 - Day08-14 |
| ko04810; Regulation of actin cytoskeleton                       | 0.000118694 | 0.000145793 | Day08-14 | Day03-07 - Day08-14 |
| ko04962; Vasopressin-regulated water reabsorption               | 0.000108963 | 0.000145793 | Day08-14 | Day03-07 - Day08-14 |
| ko04975; Fat digestion and absorption                           | 8.22E-05    | 0.000145793 | Day08-14 | Day03-07 - Day08-14 |
| ko05202; Transcriptional misregulation in cancer                | 9.32E-05    | 0.000145793 | Day08-14 | Day03-07 - Day08-14 |
| ko05220; Chronic myeloid leukemia                               | 8.98E-05    | 0.000145793 | Day08-14 | Day03-07 - Day08-14 |
| ko05412; Arrhythmogenic right ventricular cardiomyopathy (ARVC) | 6.25E-05    | 0.000145793 | Day08-14 | Day03-07 - Day08-14 |
| ko05414; Dilated cardiomyopathy                                 | 6.25E-05    | 0.000145793 | Day08-14 | Day03-07 - Day08-14 |
| ko00450; Selenocompound metabolism                              | 0.000131872 | 0.000236604 | Day03-07 | Day03-07 - Day08-14 |
| ko00604; Glycosphingolipid biosynthesis - ganglio series        | 0.000123061 | 0.000236604 | Day08-14 | Day03-07 - Day08-14 |
| ko00240; Pyrimidine metabolism                                  | 0.000215926 | 0.000470296 | Day08-14 | Day03-07 - Day08-14 |
| ko01055; Biosynthesis of vancomycin group antibiotics           | 0.000219572 | 0.000470296 | Day08-14 | Day03-07 - Day08-14 |
| ko02010; ABC transporters                                       | 0.00017638  | 0.000470296 | Day03-07 | Day03-07 - Day08-14 |
| ko04064; NF-kappa B signaling pathway                           | 0.000233992 | 0.000470296 | Day08-14 | Day03-07 - Day08-14 |
| ko04112; Cell cycle - Caulobacter                               | 0.000191949 | 0.000470296 | Day08-14 | Day03-07 - Day08-14 |
| ko04626; Plant-pathogen interaction                             | 0.000167617 | 0.000470296 | Day03-07 | Day03-07 - Day08-14 |
| ko04916; Melanogenesis                                          | 0.000135979 | 0.000470296 | Day08-14 | Day03-07 - Day08-14 |
| ko05140; Leishmaniasis                                          | 0.000233992 | 0.000470296 | Day08-14 | Day03-07 - Day08-14 |
| ko00253; Tetracycline biosynthesis                              | 0.000277087 | 0.000568971 | Day03-07 | Day03-07 - Day08-14 |
| ko00785; Lipoic acid metabolism                                 | 0.000300849 | 0.000568971 | Day03-07 | Day03-07 - Day08-14 |
| ko03070; Bacterial secretion system                             | 0.000268084 | 0.000568971 | Day03-07 | Day03-07 - Day08-14 |
| ko03440; Homologous recombination                               | 0.000238688 | 0.000568971 | Day08-14 | Day03-07 - Day08-14 |
| ko04080; Neuroactive ligand-receptor interaction                | 0.000292503 | 0.000568971 | Day08-14 | Day03-07 - Day08-14 |
| ko04622; RIG-I-like receptor signaling pathway                  | 0.000321219 | 0.000568971 | Day03-07 | Day03-07 - Day08-14 |
| ko00300; Lysine biosynthesis                                    | 0.000331881 | 0.000834975 | Day08-14 | Day03-07 - Day08-14 |
| ko00364; Fluorobenzoate degradation                             | 0.00038409  | 0.000834975 | Day03-07 | Day03-07 - Day08-14 |

|                                                                     |             |             |          |                     |
|---------------------------------------------------------------------|-------------|-------------|----------|---------------------|
| ko00720; Carbon fixation pathways in prokaryotes                    | 0.000360004 | 0.000834975 | Day08-14 | Day03-07 - Day08-14 |
| ko05169; Epstein-Barr virus infection                               | 0.000419343 | 0.000834975 | Day03-07 | Day03-07 - Day08-14 |
| ko04141; Protein processing in endoplasmic reticulum                | 0.000423057 | 0.002396589 | Day08-14 | Day03-07 - Day08-14 |
| ko00460; Cyanoamino acid metabolism                                 | 0.000590446 | 0.002834065 | Day03-07 | Day03-07 - Day08-14 |
| ko00523; Polyketide sugar unit biosynthesis                         | 0.000700997 | 0.002834065 | Day08-14 | Day03-07 - Day08-14 |
| ko04122; Sulfur relay system                                        | 0.00074576  | 0.002834065 | Day08-14 | Day03-07 - Day08-14 |
| ko05016; Huntingtons disease                                        | 0.000856352 | 0.002834065 | Day03-07 | Day03-07 - Day08-14 |
| ko05134; Legionellosis                                              | 0.000488481 | 0.002834065 | Day08-14 | Day03-07 - Day08-14 |
| ko05200; Pathways in cancer                                         | 0.000896474 | 0.002834065 | Day08-14 | Day03-07 - Day08-14 |
| ko00250; Alanine, aspartate and glutamate metabolism                | 0.001324644 | 0.005498727 | Day08-14 | Day03-07 - Day08-14 |
| ko00730; Thiamine metabolism                                        | 0.001364383 | 0.005498727 | Day08-14 | Day03-07 - Day08-14 |
| ko00940; Phenylpropanoid biosynthesis                               | 0.001826811 | 0.005498727 | Day03-07 | Day03-07 - Day08-14 |
| ko05120; Epithelial cell signaling in Helicobacter pylori infection | 0.001468591 | 0.005498727 | Day03-07 | Day03-07 - Day08-14 |
| ko05211; Renal cell carcinoma                                       | 0.001774802 | 0.005498727 | Day08-14 | Day03-07 - Day08-14 |
| ko05222; Small cell lung cancer                                     | 0.000952682 | 0.005498727 | Day08-14 | Day03-07 - Day08-14 |
| ko00020; Citrate cycle (TCA cycle)                                  | 0.001853337 | 0.005535155 | Day03-07 | Day03-07 - Day08-14 |
| ko00195; Photosynthesis                                             | 0.006251038 | 0.005535155 | Day08-14 | Day03-07 - Day08-14 |
| ko00330; Arginine and proline metabolism                            | 0.002463965 | 0.005535155 | Day08-14 | Day03-07 - Day08-14 |
| ko00351; DDT degradation                                            | 0.00279471  | 0.005535155 | Day08-14 | Day03-07 - Day08-14 |
| ko00472; D-Arginine and D-ornithine metabolism                      | 0.003344319 | 0.005535155 | Day03-07 | Day03-07 - Day08-14 |
| ko00561; Glycerolipid metabolism                                    | 0.002913663 | 0.005535155 | Day03-07 | Day03-07 - Day08-14 |
| ko00591; Linoleic acid metabolism                                   | 0.00481191  | 0.005535155 | Day03-07 | Day03-07 - Day08-14 |
| ko00600; Sphingolipid metabolism                                    | 0.003390427 | 0.005535155 | Day08-14 | Day03-07 - Day08-14 |
| ko00620; Pyruvate metabolism                                        | 0.00415511  | 0.005535155 | Day03-07 | Day03-07 - Day08-14 |
| ko00622; Xylene degradation                                         | 0.00514041  | 0.005535155 | Day08-14 | Day03-07 - Day08-14 |
| ko00624; Polycyclic aromatic hydrocarbon degradation                | 0.003209399 | 0.005535155 | Day08-14 | Day03-07 - Day08-14 |
| ko00633; Nitrotoluene degradation                                   | 0.006581604 | 0.005535155 | Day03-07 | Day03-07 - Day08-14 |
| ko00750; Vitamin B6 metabolism                                      | 0.004268115 | 0.005535155 | Day08-14 | Day03-07 - Day08-14 |
| ko00770; Pantothenate and CoA biosynthesis                          | 0.002395511 | 0.005535155 | Day08-14 | Day03-07 - Day08-14 |
| ko00906; Carotenoid biosynthesis                                    | 0.004211269 | 0.005535155 | Day08-14 | Day03-07 - Day08-14 |
| ko01051; Biosynthesis of ansamycins                                 | 0.002498859 | 0.005535155 | Day03-07 | Day03-07 - Day08-14 |
| ko03015; mRNA surveillance pathway                                  | 0.006251038 | 0.005535155 | Day03-07 | Day03-07 - Day08-14 |
| ko03050; Proteasome                                                 | 0.003580706 | 0.005535155 | Day08-14 | Day03-07 - Day08-14 |
| ko04020; Calcium signaling pathway                                  | 0.004502523 | 0.005535155 | Day08-14 | Day03-07 - Day08-14 |
| ko04114; Oocyte meiosis                                             | 0.006799255 | 0.005535155 | Day08-14 | Day03-07 - Day08-14 |

|                                                                    |             |             |          |                     |
|--------------------------------------------------------------------|-------------|-------------|----------|---------------------|
| ko04270; Vascular smooth muscle contraction                        | 0.006799255 | 0.005535155 | Day08-14 | Day03-07 - Day08-14 |
| ko04370; VEGF signaling pathway                                    | 0.002913663 | 0.005535155 | Day08-14 | Day03-07 - Day08-14 |
| ko04666; Fc gamma R-mediated phagocytosis                          | 0.004099632 | 0.005535155 | Day08-14 | Day03-07 - Day08-14 |
| ko04720; Long-term potentiation                                    | 0.006799255 | 0.005535155 | Day08-14 | Day03-07 - Day08-14 |
| ko04722; Neurotrophin signaling pathway                            | 0.006799255 | 0.005535155 | Day08-14 | Day03-07 - Day08-14 |
| ko04740; Olfactory transduction                                    | 0.006799255 | 0.005535155 | Day08-14 | Day03-07 - Day08-14 |
| ko04744; Phototransduction                                         | 0.006799255 | 0.005535155 | Day08-14 | Day03-07 - Day08-14 |
| ko04745; Phototransduction - fly                                   | 0.006799255 | 0.005535155 | Day08-14 | Day03-07 - Day08-14 |
| ko05150; Staphylococcus aureus infection                           | 0.002078632 | 0.005535155 | Day08-14 | Day03-07 - Day08-14 |
| ko05152; Tuberculosis                                              | 0.006332247 | 0.005535155 | Day08-14 | Day03-07 - Day08-14 |
| ko05160; Hepatitis C                                               | 0.005480406 | 0.005535155 | Day08-14 | Day03-07 - Day08-14 |
| ko05162; Measles                                                   | 0.005480406 | 0.005535155 | Day08-14 | Day03-07 - Day08-14 |
| ko05214; Glioma                                                    | 0.006799255 | 0.005535155 | Day08-14 | Day03-07 - Day08-14 |
| ko00040; Pentose and glucuronate interconversions                  | 0.007965754 | 0.009152701 | Day03-07 | Day03-07 - Day08-14 |
| ko00473; D-Alanine metabolism                                      | 0.007865947 | 0.009152701 | Day08-14 | Day03-07 - Day08-14 |
| ko00960; Tropane, piperidine and pyridine alkaloid biosynthesis    | 0.006839757 | 0.009152701 | Day03-07 | Day03-07 - Day08-14 |
| ko04961; Endocrine and other factor-regulated calcium reabsorption | 0.007965754 | 0.009152701 | Day08-14 | Day03-07 - Day08-14 |
| ko04972; Pancreatic secretion                                      | 0.007290285 | 0.009152701 | Day08-14 | Day03-07 - Day08-14 |
| ko00052; Galactose metabolism                                      | 0.014999488 | 0.030178743 | Day03-07 | Day03-07 - Day08-14 |
| ko00190; Oxidative phosphorylation                                 | 0.012553962 | 0.030178743 | Day08-14 | Day03-07 - Day08-14 |
| ko00670; One carbon pool by folate                                 | 0.016468133 | 0.030178743 | Day08-14 | Day03-07 - Day08-14 |
| ko00780; Biotin metabolism                                         | 0.016660318 | 0.030178743 | Day08-14 | Day03-07 - Day08-14 |
| ko02030; Bacterial chemotaxis                                      | 0.017448893 | 0.030178743 | Day08-14 | Day03-07 - Day08-14 |
| ko03410; Base excision repair                                      | 0.016089595 | 0.030178743 | Day03-07 | Day03-07 - Day08-14 |
| ko04210; Apoptosis                                                 | 0.013486272 | 0.030178743 | Day08-14 | Day03-07 - Day08-14 |
| ko04612; Antigen processing and presentation                       | 0.014309398 | 0.030178743 | Day03-07 | Day03-07 - Day08-14 |
| ko04914; Progesterone-mediated oocyte maturation                   | 0.014309398 | 0.030178743 | Day03-07 | Day03-07 - Day08-14 |
| ko04960; Aldosterone-regulated sodium reabsorption                 | 0.008588768 | 0.030178743 | Day08-14 | Day03-07 - Day08-14 |
| ko04970; Salivary secretion                                        | 0.008588768 | 0.030178743 | Day08-14 | Day03-07 - Day08-14 |
| ko04971; Gastric acid secretion                                    | 0.008588768 | 0.030178743 | Day08-14 | Day03-07 - Day08-14 |
| ko05215; Prostate cancer                                           | 0.014309398 | 0.030178743 | Day03-07 | Day03-07 - Day08-14 |
| ko05014; Amyotrophic lateral sclerosis (ALS)                       | 3.10E-09    | 2.80E-07    | Day08-14 | Day08-14 - Day15-24 |
| ko03050; Proteasome                                                | 4.41E-09    | 3.83E-07    | Day15-24 | Day08-14 - Day15-24 |
| ko00331; Clavulanic acid biosynthesis                              | 7.43E-09    | 4.28E-07    | Day08-14 | Day08-14 - Day15-24 |
| ko00592; alpha-Linolenic acid metabolism                           | 1.77E-08    | 4.28E-07    | Day08-14 | Day08-14 - Day15-24 |



|                                                                  |             |             |          |                     |
|------------------------------------------------------------------|-------------|-------------|----------|---------------------|
| ko04723; Retrograde endocannabinoid signaling                    | 1.34E-08    | 4.28E-07    | Day08-14 | Day08-14 - Day15-24 |
| ko05020; Prion diseases                                          | 1.56E-08    | 4.28E-07    | Day08-14 | Day08-14 - Day15-24 |
| ko04974; Protein digestion and absorption                        | 2.09E-08    | 3.33E-06    | Day15-24 | Day08-14 - Day15-24 |
| ko00380; Tryptophan metabolism                                   | 4.72E-08    | 4.96E-06    | Day08-14 | Day08-14 - Day15-24 |
| ko00400; Phenylalanine, tyrosine and tryptophan biosynthesis     | 5.90E-07    | 1.25E-05    | Day15-24 | Day08-14 - Day15-24 |
| ko03040; Spliceosome                                             | 7.74E-07    | 1.25E-05    | Day08-14 | Day08-14 - Day15-24 |
| ko04514; Cell adhesion molecules (CAMs)                          | 7.77E-07    | 1.25E-05    | Day15-24 | Day08-14 - Day15-24 |
| ko04610; Complement and coagulation cascades                     | 2.49E-07    | 1.25E-05    | Day08-14 | Day08-14 - Day15-24 |
| ko04724; Glutamatergic synapse                                   | 9.61E-07    | 1.25E-05    | Day15-24 | Day08-14 - Day15-24 |
| ko04810; Regulation of actin cytoskeleton                        | 6.82E-07    | 1.25E-05    | Day15-24 | Day08-14 - Day15-24 |
| ko05131; Shigellosis                                             | 8.63E-08    | 1.25E-05    | Day08-14 | Day08-14 - Day15-24 |
| ko05412; Arrhythmogenic right ventricular cardiomyopathy (ARVC)  | 7.77E-07    | 1.25E-05    | Day15-24 | Day08-14 - Day15-24 |
| ko05414; Dilated cardiomyopathy                                  | 7.77E-07    | 1.25E-05    | Day15-24 | Day08-14 - Day15-24 |
| ko00520; Amino sugar and nucleotide sugar metabolism             | 9.74E-07    | 7.45E-05    | Day15-24 | Day08-14 - Day15-24 |
| ko00471; D-Glutamine and D-glutamate metabolism                  | 4.59E-06    | 0.000191679 | Day15-24 | Day08-14 - Day15-24 |
| ko04916; Melanogenesis                                           | 1.56E-06    | 0.000191679 | Day15-24 | Day08-14 - Day15-24 |
| ko05202; Transcriptional misregulation in cancer                 | 4.37E-06    | 0.000191679 | Day15-24 | Day08-14 - Day15-24 |
| ko04080; Neuroactive ligand-receptor interaction                 | 1.26E-05    | 0.000351318 | Day15-24 | Day08-14 - Day15-24 |
| ko04975; Fat digestion and absorption                            | 1.26E-05    | 0.000351318 | Day15-24 | Day08-14 - Day15-24 |
| ko05169; Epstein-Barr virus infection                            | 6.10E-06    | 0.000351318 | Day15-24 | Day08-14 - Day15-24 |
| ko00232; Caffeine metabolism                                     | 7.33E-05    | 0.000771811 | Day08-14 | Day08-14 - Day15-24 |
| ko00253; Tetracycline biosynthesis                               | 4.09E-05    | 0.000771811 | Day08-14 | Day08-14 - Day15-24 |
| ko00401; Novobiocin biosynthesis                                 | 7.75E-05    | 0.000771811 | Day15-24 | Day08-14 - Day15-24 |
| ko00500; Starch and sucrose metabolism                           | 6.78E-05    | 0.000771811 | Day15-24 | Day08-14 - Day15-24 |
| ko00513; Various types of N-glycan biosynthesis                  | 1.44E-05    | 0.000771811 | Day15-24 | Day08-14 - Day15-24 |
| ko00623; Toluene degradation                                     | 7.75E-05    | 0.000771811 | Day08-14 | Day08-14 - Day15-24 |
| ko01053; Biosynthesis of siderophore group nonribosomal peptides | 6.49E-05    | 0.000771811 | Day08-14 | Day08-14 - Day15-24 |
| ko01057; Biosynthesis of type II polyketide products             | 5.80E-05    | 0.000771811 | Day08-14 | Day08-14 - Day15-24 |
| ko03010; Ribosome                                                | 5.13E-05    | 0.000771811 | Day15-24 | Day08-14 - Day15-24 |
| ko04640; Hematopoietic cell lineage                              | 2.40E-05    | 0.000771811 | Day15-24 | Day08-14 - Day15-24 |
| ko05100; Bacterial invasion of epithelial cells                  | 2.93E-05    | 0.000771811 | Day08-14 | Day08-14 - Day15-24 |
| ko00310; Lysine degradation                                      | 0.000145273 | 0.001828317 | Day08-14 | Day08-14 - Day15-24 |
| ko00603; Glycosphingolipid biosynthesis - globo series           | 8.74E-05    | 0.001828317 | Day15-24 | Day08-14 - Day15-24 |
| ko00984; Steroid degradation                                     | 0.000156489 | 0.001828317 | Day08-14 | Day08-14 - Day15-24 |
| ko01055; Biosynthesis of vancomycin group antibiotics            | 8.74E-05    | 0.001828317 | Day15-24 | Day08-14 - Day15-24 |

|                                                                 |             |             |          |                     |
|-----------------------------------------------------------------|-------------|-------------|----------|---------------------|
| ko05130; Pathogenic Escherichia coli infection                  | 0.000136266 | 0.001828317 | Day08-14 | Day08-14 - Day15-24 |
| ko05164; Influenza A                                            | 0.000161541 | 0.001828317 | Day15-24 | Day08-14 - Day15-24 |
| ko05204; Chemical carcinogenesis                                | 0.000163258 | 0.001828317 | Day08-14 | Day08-14 - Day15-24 |
| ko00363; Bisphenol degradation                                  | 0.000173932 | 0.002295258 | Day08-14 | Day08-14 - Day15-24 |
| ko00473; D-Alanine metabolism                                   | 0.000221233 | 0.002295258 | Day15-24 | Day08-14 - Day15-24 |
| ko00901; Indole alkaloid biosynthesis                           | 0.000203556 | 0.002295258 | Day08-14 | Day08-14 - Day15-24 |
| ko00051; Fructose and mannose metabolism                        | 0.000564731 | 0.009251318 | Day15-24 | Day08-14 - Day15-24 |
| ko00531; Glycosaminoglycan degradation                          | 0.000228226 | 0.009251318 | Day15-24 | Day08-14 - Day15-24 |
| ko03015; mRNA surveillance pathway                              | 0.00050698  | 0.009251318 | Day08-14 | Day08-14 - Day15-24 |
| ko04727; GABAergic synapse                                      | 0.000323394 | 0.009251318 | Day15-24 | Day08-14 - Day15-24 |
| ko05111; Vibrio cholerae pathogenic cycle                       | 0.000383863 | 0.009251318 | Day08-14 | Day08-14 - Day15-24 |
| ko04064; NF-kappa B signaling pathway                           | 0.001256247 | 0.017059387 | Day15-24 | Day08-14 - Day15-24 |
| ko04940; Type I diabetes mellitus                               | 0.000887451 | 0.017059387 | Day15-24 | Day08-14 - Day15-24 |
| ko05110; Vibrio cholerae infection                              | 0.001041361 | 0.017059387 | Day08-14 | Day08-14 - Day15-24 |
| ko05140; Leishmaniasis                                          | 0.001256247 | 0.017059387 | Day15-24 | Day08-14 - Day15-24 |
| ko05145; Toxoplasmosis                                          | 0.000592958 | 0.017059387 | Day15-24 | Day08-14 - Day15-24 |
| ko00982; Drug metabolism - cytochrome P450                      | 0.001465349 | 0.017880782 | Day08-14 | Day08-14 - Day15-24 |
| ko05133; Pertussis                                              | 0.001265523 | 0.017880782 | Day08-14 | Day08-14 - Day15-24 |
| ko00590; Arachidonic acid metabolism                            | 0.001547502 | 0.018567059 | Day08-14 | Day08-14 - Day15-24 |
| ko00071; Fatty acid metabolism                                  | 0.001954847 | 0.020888313 | Day08-14 | Day08-14 - Day15-24 |
| ko00600; Sphingolipid metabolism                                | 0.0025238   | 0.020888313 | Day15-24 | Day08-14 - Day15-24 |
| ko00627; Aminobenzoate degradation                              | 0.002501893 | 0.020888313 | Day08-14 | Day08-14 - Day15-24 |
| ko00790; Folate biosynthesis                                    | 0.00248016  | 0.020888313 | Day15-24 | Day08-14 - Day15-24 |
| ko00980; Metabolism of xenobiotics by cytochrome P450           | 0.001693903 | 0.020888313 | Day08-14 | Day08-14 - Day15-24 |
| ko05012; Parkinsons disease                                     | 0.002545882 | 0.020888313 | Day08-14 | Day08-14 - Day15-24 |
| ko00965; Betalain biosynthesis                                  | 0.002682127 | 0.024353449 | Day08-14 | Day08-14 - Day15-24 |
| ko00960; Tropane, piperidine and pyridine alkaloid biosynthesis | 0.003468705 | 0.045274535 | Day08-14 | Day08-14 - Day15-24 |
| ko05132; Salmonella infection                                   | 0.002874153 | 0.045274535 | Day08-14 | Day08-14 - Day15-24 |
| ko00340; Histidine metabolism                                   | 1.31E-09    | 1.21E-07    | Day15-24 | Day15-24 - Day25-35 |
| ko00030; Pentose phosphate pathway                              | 2.08E-08    | 1.16E-06    | Day25-35 | Day15-24 - Day25-35 |
| ko04622; RIG-I-like receptor signaling pathway                  | 2.16E-09    | 1.16E-06    | Day25-35 | Day15-24 - Day25-35 |
| ko05168; Herpes simplex infection                               | 2.35E-08    | 1.16E-06    | Day15-24 | Day15-24 - Day25-35 |
| ko00710; Carbon fixation in photosynthetic organisms            | 3.31E-08    | 1.46E-06    | Day25-35 | Day15-24 - Day25-35 |
| ko00790; Folate biosynthesis                                    | 6.64E-08    | 1.46E-06    | Day25-35 | Day15-24 - Day25-35 |
| ko00010; Glycolysis / Gluconeogenesis                           | 1.08E-07    | 3.74E-06    | Day25-35 | Day15-24 - Day25-35 |

|                                                              |             |             |          |                     |
|--------------------------------------------------------------|-------------|-------------|----------|---------------------|
| ko00521; Streptomycin biosynthesis                           | 2.34E-07    | 3.74E-06    | Day25-35 | Day15-24 - Day25-35 |
| ko04112; Cell cycle - Caulobacter                            | 1.82E-07    | 3.74E-06    | Day15-24 | Day15-24 - Day25-35 |
| ko04115; p53 signaling pathway                               | 1.82E-07    | 3.74E-06    | Day15-24 | Day15-24 - Day25-35 |
| ko05164; Influenza A                                         | 2.56E-07    | 3.74E-06    | Day25-35 | Day15-24 - Day25-35 |
| ko05210; Colorectal cancer                                   | 7.21E-08    | 3.74E-06    | Day15-24 | Day15-24 - Day25-35 |
| ko05416; Viral myocarditis                                   | 7.21E-08    | 3.74E-06    | Day15-24 | Day15-24 - Day25-35 |
| ko02030; Bacterial chemotaxis                                | 2.72E-07    | 1.40E-05    | Day15-24 | Day15-24 - Day25-35 |
| ko04210; Apoptosis                                           | 5.01E-07    | 1.40E-05    | Day15-24 | Day15-24 - Day25-35 |
| ko00472; D-Arginine and D-ornithine metabolism               | 5.21E-07    | 3.11E-05    | Day25-35 | Day15-24 - Day25-35 |
| ko00941; Flavonoid biosynthesis                              | 7.97E-07    | 3.20E-05    | Day15-24 | Day15-24 - Day25-35 |
| ko00312; beta-Lactam resistance                              | 5.76E-06    | 0.000163818 | Day15-24 | Day15-24 - Day25-35 |
| ko00523; Polyketide sugar unit biosynthesis                  | 2.65E-06    | 0.000163818 | Day25-35 | Day15-24 - Day25-35 |
| ko02020; Two-component system                                | 1.25E-05    | 0.000163818 | Day15-24 | Day15-24 - Day25-35 |
| ko02060; Phosphotransferase system (PTS)                     | 1.08E-06    | 0.000163818 | Day25-35 | Day15-24 - Day25-35 |
| ko03010; Ribosome                                            | 1.17E-05    | 0.000163818 | Day25-35 | Day15-24 - Day25-35 |
| ko04940; Type I diabetes mellitus                            | 6.13E-06    | 0.000163818 | Day25-35 | Day15-24 - Day25-35 |
| ko05219; Bladder cancer                                      | 1.06E-05    | 0.000163818 | Day25-35 | Day15-24 - Day25-35 |
| ko05222; Small cell lung cancer                              | 7.00E-06    | 0.000163818 | Day15-24 | Day15-24 - Day25-35 |
| ko00052; Galactose metabolism                                | 2.38E-05    | 0.000392037 | Day25-35 | Day15-24 - Day25-35 |
| ko00130; Ubiquinone and other terpenoid-quinone biosynthesis | 1.27E-05    | 0.000392037 | Day25-35 | Day15-24 - Day25-35 |
| ko00290; Valine, leucine and isoleucine biosynthesis         | 3.03E-05    | 0.000392037 | Day15-24 | Day15-24 - Day25-35 |
| ko03450; Non-homologous end-joining                          | 2.70E-05    | 0.000392037 | Day25-35 | Day15-24 - Day25-35 |
| ko04070; Phosphatidylinositol signaling system               | 1.69E-05    | 0.000392037 | Day25-35 | Day15-24 - Day25-35 |
| ko05146; Amoebiasis                                          | 2.79E-05    | 0.000392037 | Day15-24 | Day15-24 - Day25-35 |
| ko00604; Glycosphingolipid biosynthesis - ganglio series     | 5.21E-05    | 0.001884939 | Day15-24 | Day15-24 - Day25-35 |
| ko04930; Type II diabetes mellitus                           | 3.37E-05    | 0.001884939 | Day25-35 | Day15-24 - Day25-35 |
| ko00053; Ascorbate and aldarate metabolism                   | 0.000196433 | 0.00197874  | Day25-35 | Day15-24 - Day25-35 |
| ko00072; Synthesis and degradation of ketone bodies          | 0.000154622 | 0.00197874  | Day15-24 | Day15-24 - Day25-35 |
| ko00196; Photosynthesis - antenna proteins                   | 0.000150028 | 0.00197874  | Day25-35 | Day15-24 - Day25-35 |
| ko00350; Tyrosine metabolism                                 | 0.000159347 | 0.00197874  | Day15-24 | Day15-24 - Day25-35 |
| ko00450; Selenocompound metabolism                           | 0.000179642 | 0.00197874  | Day25-35 | Day15-24 - Day25-35 |
| ko00471; D-Glutamine and D-glutamate metabolism              | 8.71E-05    | 0.00197874  | Day25-35 | Day15-24 - Day25-35 |
| ko00909; Sesquiterpenoid and triterpenoid biosynthesis       | 0.00021469  | 0.00197874  | Day15-24 | Day15-24 - Day25-35 |
| ko03430; Mismatch repair                                     | 0.000109797 | 0.00197874  | Day15-24 | Day15-24 - Day25-35 |
| ko04974; Protein digestion and absorption                    | 6.72E-05    | 0.00197874  | Day25-35 | Day15-24 - Day25-35 |

|                                                       |             |             |          |                     |
|-------------------------------------------------------|-------------|-------------|----------|---------------------|
| ko05142; Chagas disease (American trypanosomiasis)    | 0.000241519 | 0.00197874  | Day25-35 | Day15-24 - Day25-35 |
| ko00524; Butirosin and neomycin biosynthesis          | 0.000243296 | 0.002969885 | Day25-35 | Day15-24 - Day25-35 |
| ko04310; Wnt signaling pathway                        | 0.000347041 | 0.002969885 | Day15-24 | Day15-24 - Day25-35 |
| ko04330; Notch signaling pathway                      | 0.000347041 | 0.002969885 | Day15-24 | Day15-24 - Day25-35 |
| ko05203; Viral carcinogenesis                         | 0.000367481 | 0.002969885 | Day25-35 | Day15-24 - Day25-35 |
| ko05220; Chronic myeloid leukemia                     | 0.000347041 | 0.002969885 | Day15-24 | Day15-24 - Day25-35 |
| ko00061; Fatty acid biosynthesis                      | 0.000605033 | 0.004279392 | Day15-24 | Day15-24 - Day25-35 |
| ko00195; Photosynthesis                               | 0.000661672 | 0.004279392 | Day25-35 | Day15-24 - Day25-35 |
| ko00253; Tetracycline biosynthesis                    | 0.000375432 | 0.004279392 | Day15-24 | Day15-24 - Day25-35 |
| ko00540; Lipopolysaccharide biosynthesis              | 0.00052298  | 0.004279392 | Day25-35 | Day15-24 - Day25-35 |
| ko00630; Glyoxylate and dicarboxylate metabolism      | 0.000661672 | 0.004279392 | Day25-35 | Day15-24 - Day25-35 |
| ko01051; Biosynthesis of ansamycins                   | 0.000657146 | 0.004279392 | Day25-35 | Day15-24 - Day25-35 |
| ko03060; Protein export                               | 0.000605033 | 0.004279392 | Day25-35 | Day15-24 - Day25-35 |
| ko05322; Systemic lupus erythematosus                 | 0.000541518 | 0.004279392 | Day15-24 | Day15-24 - Day25-35 |
| ko00051; Fructose and mannose metabolism              | 0.001580412 | 0.011322937 | Day25-35 | Day15-24 - Day25-35 |
| ko00230; Purine metabolism                            | 0.001388759 | 0.011322937 | Day25-35 | Day15-24 - Day25-35 |
| ko00281; Geraniol degradation                         | 0.000934912 | 0.011322937 | Day15-24 | Day15-24 - Day25-35 |
| ko00331; Clavulanic acid biosynthesis                 | 0.001663673 | 0.011322937 | Day25-35 | Day15-24 - Day25-35 |
| ko00351; DDT degradation                              | 0.001251127 | 0.011322937 | Day15-24 | Day15-24 - Day25-35 |
| ko00362; Benzoate degradation                         | 0.001962938 | 0.011322937 | Day15-24 | Day15-24 - Day25-35 |
| ko00562; Inositol phosphate metabolism                | 0.001026433 | 0.011322937 | Day25-35 | Day15-24 - Day25-35 |
| ko00623; Toluene degradation                          | 0.002000478 | 0.011322937 | Day25-35 | Day15-24 - Day25-35 |
| ko01055; Biosynthesis of vancomycin group antibiotics | 0.000680068 | 0.011322937 | Day25-35 | Day15-24 - Day25-35 |
| ko01056; Biosynthesis of type II polyketide backbone  | 0.002064511 | 0.011322937 | Day15-24 | Day15-24 - Day25-35 |
| ko02010; ABC transporters                             | 0.001111408 | 0.011322937 | Day25-35 | Day15-24 - Day25-35 |
| ko03008; Ribosome biogenesis in eukaryotes            | 0.001762155 | 0.011322937 | Day25-35 | Day15-24 - Day25-35 |
| ko03020; RNA polymerase                               | 0.001621551 | 0.011322937 | Day25-35 | Day15-24 - Day25-35 |
| ko04975; Fat digestion and absorption                 | 0.001226767 | 0.011322937 | Day15-24 | Day15-24 - Day25-35 |
| ko00300; Lysine biosynthesis                          | 0.002383987 | 0.019852813 | Day15-24 | Day15-24 - Day25-35 |
| ko00643; Styrene degradation                          | 0.002090647 | 0.019852813 | Day15-24 | Day15-24 - Day25-35 |
| ko00270; Cysteine and methionine metabolism           | 0.002443962 | 0.021979557 | Day15-24 | Day15-24 - Day25-35 |
| ko02040; Flagellar assembly                           | 0.002697924 | 0.021979557 | Day15-24 | Day15-24 - Day25-35 |
| ko05010; Alzheimers disease                           | 0.002903976 | 0.021979557 | Day15-24 | Day15-24 - Day25-35 |
| ko00280; Valine, leucine and isoleucine degradation   | 0.003030708 | 0.030943195 | Day15-24 | Day15-24 - Day25-35 |
| ko00360; Phenylalanine metabolism                     | 0.003833813 | 0.030943195 | Day15-24 | Day15-24 - Day25-35 |

644

|                               |             |             |          |                     |
|-------------------------------|-------------|-------------|----------|---------------------|
| ko00473; D-Alanine metabolism | 0.003743341 | 0.030943195 | Day25-35 | Day15-24 - Day25-35 |
|-------------------------------|-------------|-------------|----------|---------------------|
